# Supplementary material for: Feeding state functionally reconfigures a sensory circuit to drive thermosensory behavioral plasticity
Source: eLife. 2020 Oct 19;9:e61167. doi: 10.7554/eLife.61167 (PMC7644224; doi:10.7554/eLife.61167)
Supplement: Figure 1—figure supplement 1—source data 1. [file elife-61167-fig1-figsupp1-data1.xlsx]

## Sheet: Sheet1
Panel A			Panel B				Panel C
Fed	Starved		fed	st	st+Bacteria on lid		Live	Dead
154.39	128.52		0.46909	0.084069	0.049764		0.66866	0.34037
145.97	119.1		0.41856	0.17461	0.065568		0.45831	0.44036
139.17	104.38		0.44415	0.27727	-0.113		0.40156	0.22342
146.79	178.28		0.5857	0.23163	-0.20423		0.4837	0.24595
93.726	96.442		0.49398	0.11078	-0.12669		0.36677	0.40809
164.96	77.51		0.43273	0.11735	0.077729		0.35863	0.2611
137.6	98.1		0.17139	0.034141	0.16393		0.21994	0.47975
			0.37411	0.029665
