# Supplementary material for: Feeding state functionally reconfigures a sensory circuit to drive thermosensory behavioral plasticity
Source: eLife. 2020 Oct 19;9:e61167. doi: 10.7554/eLife.61167 (PMC7644224; doi:10.7554/eLife.61167)
Supplement: Figure 1—figure supplement 2—source data 1. [file elife-61167-fig1-figsupp2-data1.xlsx]

## Sheet: Sheet1
Panel A			Panel B
fed	st		N2 fed	Responding	Total	% responding			N2 starved 3 hrs	Responding	Total	% responding
13	0		101519_1	1	6	16.6667			101519_4	2	6	33.3333
3	6.875		101519_2	0	6	0			101519_5	1	3	33.3333
2.5	0		101519_3	0	5	0			101519_6	1	5	20
2.61538	0		101619_1	2	6	33.3333			101519_7	4	5	80
8.5	9.75		101619_2	2	6	33.3333			101619_4	4	6	66.6667
0.866667	9.8		101619_3	1	3	33.3333			101619_5	1	3	33.3333
11.125	4.45		101619_7	0	3	0			101619_6	2	5	40
43.625	8.4375		101919_1	3	5	60			101619_8	0	6	0
1.75	10.1667		101919_2	3	4	75			101619_9	2	4	50
11.2778	0		101919_5	1	6	16.6667			101919_3	1	6	16.6667
14.6818	11.6429								101919_4	2	4	50
18.5	8.375
1.4	0
0	0
0	13.7143
0	6.23529
0	17.3
0	3
0	10
0	11.5
0	3.5
0	11.7857
0	0
0	0
0	0
4	14.8
4.85714	3.5
0.75	4.875
0	0
5.31818	0
0	0
76	0
0	34
30	55.5
33.375	116
0	21
26	15
0	0
4.8	0
0	0
15.5	3.125
20	53
0	0
0
