# Supplementary material for: Feeding state functionally reconfigures a sensory circuit to drive thermosensory behavioral plasticity
Source: eLife. 2020 Oct 19;9:e61167. doi: 10.7554/eLife.61167 (PMC7644224; doi:10.7554/eLife.61167)
Supplement: Figure 1—source data 1. [file elife-61167-fig1-data1.xlsx]

## Sheet: Fig 1C
fed	1hr	2hr	3hr	re-feed
0.24761	0.25678	0.14517	0.22139	0.308
0.30601	0.22463	0.20307	0.26062	0.33185
0.27192	0.29093	-0.091514	0.02283	0.20423
0.397	0.0888	0.078338	0.23801	0.60676
0.28846	0.24451	0.20939	-0.030695	0.39695
0.33333	0.013216	0.18085	-0.125	0.38329
0.23529	0.33487	0.011876	-0.056285	0.26838
0.15234	0.20768	0.13369	-0.0098731	0.35707
0.279	0.043401	0.01589	0.065124	0.048524
0.025594		0.098529	0.053454
		0.034211

## Sheet: Fig 1D
Fed							Fed	Fed	Fed	Fed	Fed	Fed	Fed	Fed		Stv	Stv	Stv	Stv	Stv	Stv	Stv	Stv
degrees (pi, max)			turn number in each range	fraction	degrees		2.02546	2.87597	-1.4577	-2.87272	-2.92835	2.05359	-1.68814	3.09054		0.0349688	1.56534	-3.0199	-2.84259	-0.0454596	1.3721	2.86898	0.252376
-3.14159	<=-3.14159265358979	0	0	0			-0.858797	1.91465	2.92522	-2.27425	2.83099	1.08161	0.123863	2.53405		1.20377	0.721534	0.731455	3.13887	-0.87	-1.21025	-2.14041	1.53528
-2.35619	<=-2.35619449019234	333	333	0.18459	-180 to -135		2.48963	2.83377	-2.80384	-1.5533	-2.50932	2.84934	-2.37686	-2.35793		2.20475	0.0347673	1.40897	2.79144	0.931431	-1.98313	-1.30107	-2.82106
-1.5708	<=-1.5707963267949	572	239	0.132483	-135 to -90		-0.662794	-1.74161	2.38058	-2.63167	-2.7392	-1.98335	-1.60191	-1.88497		-2.84859	-0.578564	2.66134	2.06895	-1.46841	2.86312	-0.396251	-1.72011
-0.785398	<=-0.785398163397448	735	163	0.0903548	-90 to -45		-0.152741	2.76903	-2.89661	-2.95568	2.77046	-1.31661	-0.626289	-2.29349		-1.90382	-1.27106	-2.48042	1.08817	-0.0652428	2.0238	0.353664	1.55019
0	<=0	867	132	0.0731707	-45 to 0		0.514157	-2.97405	-1.37576	0.0946611	-1.9994	0.232515	2.99031	-1.79002		-1.30043	-2.08766	-1.27917	-0.288511	1.84909	0.827705	1.10518	-1.04883
0.785398	<=0.785398163397448	1022	155	0.0859202	0 to 45		0.089013	-2.30699	-2.19959	2.1185	-1.3453	-2.79877	2.38528	2.33916		-0.352453	-1.51021	-0.523782	2.87193	2.51729	1.86271	-3.13198	-2.37642
1.5708	<=1.5707963267949	1221	199	0.11031	45 to 90		-2.71583	-1.43085	-1.48736	1.5764	-0.261158	1.50126	3.07469	2.80742		0.50508	-2.50245	1.34717	1.76484	1.07738	0.709683	-1.81842	1.37503
2.35619	<=2.35619449019234	1458	237	0.131375	90 to 135		-1.51392	3.13487	-2.46095	2.39068	2.19482	1.05741	-2.83581	-2.72313		1.59856	1.78869	2.03497	0.456057	0.165149	-0.0382715	-1.13266	-2.7291
3.14159	<=3.14159265358979	1804	346	0.191796	135 to 180		-1.24542	2.80027	-2.50648	-0.0627877	-2.70876	0.983899	-2.23614	0.0285353		2.58694	0.414473	2.83057	-0.275846	2.41997	-0.939927	0.360926	-0.209712
			1804				-2.01609	-2.08924	0.978266	1.34946	-1.85141	2.9228	-1.67401	-1.51954		3.12815	-0.73618	-2.82681	-1.49032	2.55424	-1.62556	1.28503	0.272269
							-1.80648	-1.42274	-1.69965	2.77032	1.55234	2.36347	1.61005	-0.520858		-1.76998	-1.84854	-1.98116	-2.12147	-0.622763	1.14204	2.09147	2.57826
							-2.36283	-1.9355	-2.78089	3.08317	-0.510571	-3.133	-2.0388	2.2259		-0.932879	-3.07738	-0.571174	-2.74949	2.95203	0.114809	-2.62158	-1.30163
							-0.709564	-2.99784	0.884409	-3.05746	2.27335	-2.853	0.204666	-1.9153		-0.258157	2.68358	0.324155	3.10392	2.02054	-0.482613	-2.40847	1.40572
							-1.34083	-1.08854	0.894551	1.90458	-2.43132	-2.5989	-1.13683	-2.50483		0.591899	1.89536	1.02342	-3.10468	-2.17688	-1.22729	-1.48622	1.72144
							2.11218	-0.161947	-2.63216	2.77761	-1.60206	-2.0189	-1.75128	-1.82138		1.48255	0.673727	2.16323	-3.00689	-2.69564	0.124355	0.255517	-2.02684
							1.37801	0.900323	2.14511	2.06593	1.01818	-1.33117	2.44025	-1.10715		2.13556	0.014727	2.87627	2.27587	1.26324	1.2338	1.59479	-0.0476959
							0.158162	1.79902	-1.43824	0.229642	-2.83221	0.669543	-1.41412	-1.40533		2.83466	-0.658332	-2.25813	1.59117	2.24831	2.25875	2.82091	1.42609
							-0.616623	2.32317	2.79396	-2.64616	-1.5586	-2.76731	-1.9499	0.915397		1.63066	-1.42436	-0.630699	2.24578	2.84987	-1.27543	-3.00863	-2.91217
							-1.42791	1.29038	2.90789	-2.2583	1.62383	1.9632	1.83309	2.70304		0.309911	-2.31167	1.25009	1.5794	1.51341	-0.445242	-1.68584	2.68481
							2.8456	1.44247	-2.57026	-1.27111	2.66496	0.573708	0.67837	2.72878		-0.422344	-2.95153	3.00154	1.05548	0.637518	0.479774	-0.890691	-1.98216
							1.00594	2.46508	2.75572	-2.64229	-2.35619	0.761442	-0.909912	1.58863		-0.875476	2.77274	-1.73985	1.66066	-1.86001	1.26532	0.0055203	-1.44846
							-0.389397	-2.60361	1.95209	0.582519	2.60468	-2.0975	-2.32994	2.77345		-1.35957	2.05205	-1.01076	-2.35868	-2.26843	2.14422	2.01726	2.08685
							-1.84663	-2.01599	2.29863	-2.69164	-2.8016	1.16351	-2.81275	-2.06644		-1.2916	-0.811366	-0.0370885	-1.6441	-0.877055	-1.69122	2.71413	2.90453
							0.550877	-2.60259	1.08432	-2.2181	3.11934	2.16454	2.67344	-2.30994		-2.09343	-1.82384	1.06004	-0.326688	0.464818	-0.264817	3.04518	-1.19189
Stv							-0.82092	-1.65714	2.41919	2.3902	-3.12744	2.23897	-2.21986	-1.58551		-2.46316	1.68235	2.00512	0.744701	1.5884	2.12317	-2.92158	0.176543
degrees (pi, max)			turn number in each range	fraction	degrees		3.12806	-0.944449	-2.33741	-0.0966368	-1.57514	-1.32398	-2.77667	-2.21581		-2.94381	0.552467	2.84547	1.66429	-2.99841	2.85309	0.429249	-2.36455
-3.14159	<=-3.14159265358979	0	0	0			2.34804	-1.6064	-2.28389	-1.84002	2.11671	2.5728	-2.54775	-2.73058		2.8905	-1.39968	-2.32999	2.4434	-1.29504	-2.78674	1.1501	-1.67046
-2.35619	<=-2.35619449019234	281	281	0.149309	-180 to -135		2.58371	2.4779	0.746374	2.99955	-2.87719	-0.534047	2.76121	0.364981		2.04722	-2.71517	-1.53977	0.93988	-0.315579	-2.12833	1.80308	0.614838
-1.5708	<=-1.5707963267949	511	230	0.12221	-135 to -90		-1.65931	3.12761	-2.40685	-3.04313	-1.85298	2.96893	2.05025	0.819758		2.40596	3.02494	-0.755568	2.04905	1.4409	-0.790982	2.56445	1.88049
-0.785398	<=-0.785398163397448	707	196	0.104145	-90 to -45		1.53739	-2.77167	0.960206	1.76442	-1.37258	-2.47387	1.17812	-1.20122		-2.73832	2.51307	-0.00478377	2.8953	0.638974	-1.76964	-3.02943	-0.5757
0	<=0	916	209	0.111052	-45 to 0		0.760346	2.74454	1.25095	-1.3734	-1.40144	2.85024	3.13401	-0.765795		-1.95484	1.72415	1.26206	-2.2829	-1.98985	-2.51119	-0.462002	-1.88385
0.785398	<=0.785398163397448	1133	217	0.115303	0 to 45		2.88316	-3.04896	-1.86793	-2.23263	-0.83831	3.12574	2.80133	2.41334		-2.85351	0.117157	2.05096	-1.60675	2.67852	-1.15367	-1.06096	2.05136
1.5708	<=1.5707963267949	1329	196	0.104145	45 to 90		-1.1799	2.87389	1.90545	2.1763	2.55388	1.90532	-0.478605	3.01		-2.29147	-2.84957	-2.62141	-1.02479	2.83834	-0.293612	-2.4623	-1.79529
2.35619	<=2.35619449019234	1584	255	0.135494	90 to 135		-2.58997	-3.10913	1.19079	2.60814	1.71292	-2.12486	2.75561	-2.52538		2.0939	-2.18334	-2.16278	3.12901	-2.98045	0.161858	-1.90455	-2.22607
3.14159	<=3.14159265358979	1882	298	0.158342	135 to 180		-2.30845	2.78985	-0.509078	-2.89031	2.80167	1.25658	-2.14845	-1.85213		2.62052	3.10008	-1.79612	-3.06928	-2.66517	1.5082	-1.20065	-0.480184
			1882				1.6741	2.17014	2.11935	2.9519	-2.76833	0.390732	-1.10733	-0.884677		1.95223	-2.6833	-0.75075	3.10962	3.01435	2.27563	-0.720986	1.70546
							0.870897	-1.09012	2.55145	-1.4936	-2.76775	2.64844	-0.620914	-1.50618		2.62524	-0.958387	-0.0391966	1.66148	-1.49464	1.75065	0.530836	0.210812
							-1.54034	1.31105	0.623659	2.477	2.59514	-2.65352	-2.01106	1.12549		-2.66762	-0.102662	1.26575	2.19574	-0.672208	2.15054	0.828449	-2.76669
							2.07378	2.36175	2.46207	-0.171097	1.66687	-1.53252	-0.731739	0.63801		-1.68244	0.729711	1.93367	-2.70805	2.15478	0.73684	1.31782	-0.23161
							0.775078	1.03902	-0.771211	-1.52736	1.38305	-0.538527	-0.16594	2.89573		-0.496029	1.63798	2.57638	-2.01321	1.64685	1.37643	0.802892	-2.14783
							1.12205	1.77743	-1.5575	1.00612	1.78105	-1.60698	-1.35837	0.496883		0.363894	2.53751	-2.6711	-1.35051	-2.55016	1.99099	2.38635	2.7787
							-2.59165	2.60022	-2.22103	-2.86903	1.36	-2.53249	-2.67151	-3.12482		1.05186	3.02652	-1.15379	-0.751064	0.475632	2.67795	-0.3442	-2.65326
							-2.62054	-1.10962	2.23517	-3.12193	-2.24357	2.58598	3.0998	2.56551		0.283765	-2.89009	-0.213304	0.0222574	-0.560641	1.39325	2.19071	-2.09686
							1.61613	-2.71472	1.54148	-2.67916	2.87748	-2.39872	-2.75512	3.0514		-0.493712	-3.13887	0.576695	1.87865	-1.69716	2.31384	-1.19977	-1.5708
							2.20286	2.83437	2.50444	-2.01576	1.90227	2.83772	-3.0997	-2.9835		0.280311	-3.08652	2.20762	-2.8585	-2.3589	-2.67714	2.88246	-0.179959
							-1.99449	2.24513	2.76364	-2.93714	1.37459	-0.852004	-2.77599	2.90595		0.682396	-2.89896	-2.91231	-2.16387	1.83327	-1.86563	-2.72099	-1.09424
							-1.4132	1.06362	-2.81427	-2.56021	-1.68441	1.22635	-1.74924	-1.96286		0.62248	-3.13282	-2.4945	-1.24623	0.298617	-1.60364	-1.91275	-1.77908
							2.21706	1.81746	-1.90927	1.76536	-2.65925	1.62775	0.762806	-1.739		1.65293	-3.13777	3.0977	-0.441033	-0.568144	-1.71657	-0.913288	-2.65176
							-2.31669	-3.14136	2.32039	-2.66331	1.59579	3.10528	1.96609	-2.34234		2.85478	2.99627	3.04078	0.263222	-2.25735	-1.09433	-1.73691	2.89681
							1.11848	1.61363	-2.436	1.78321	-2.59415	2.12687	2.58089	2.90639		-2.80402	-3.00193	-2.73568	1.93651	3.10519	1.25631	-2.2005	2.34333
							0.419472	-1.91382	1.93154	0.314232	0.966809	1.05858	-0.108634	-2.26779		2.69728	-3.11784	-1.64863	2.6711	2.11125	0.127325	-2.86462	1.62527
							2.9151	2.58248	2.76048	-2.67494	1.90462	2.04026	1.08361	-1.77654		2.22912	2.2434	0.934862	1.27717	0.957892	-1.31841	2.83425	-1.92969
							-2.73279	1.97144	3.10734	-2.56863	-2.54539	2.08754	1.82604	0.908081		-3.09624	1.01477	-0.596004	1.91852	-1.03324	-1.84351	1.87942	-2.75903
							0.620482	0.50956	-1.80863	0.379895	-1.83951	-1.97529	-2.99103	-2.63353		-3.12503	2.96802	2.65221	-2.37142	-1.7408	-2.68378	1.17735	3.07624
							-2.47376	-1.63763	1.57826	-1.68927	-0.626287	2.69248	0.699222	-1.9944		2.87375	2.28382	-2.32788	-0.868585	-2.57255	0.800747	0.187841	-3.10745
							1.91308	-1.95122	-3.11877	0.474389	0.350848	-3.08472	1.4617	-2.57926		2.35754	1.54073	-1.53	-0.171797	1.03036	-2.98623	2.04959	2.67976
							-0.495843	2.98309	2.90729	-2.35954	1.04961	-2.42609	1.81703	-3.03667		-2.84606	0.901281	0.366798	1.26742	0.299026	2.55481	1.0325	-2.55579
							-2.42106	-2.74838	2.02402	1.43236	3.08536	-3.13134	3.13382	1.67159		-1.33206	1.91401	1.18724	1.92433	-0.564288	1.88055	0.94327	2.89767
							-3.14108	1.90267	1.46747	-1.43993	-2.6551	-0.357124	-3.13372	0.994672		-0.712423	2.24314	2.11498	2.61857	-1.51434	2.13545	0.308053	-2.85809
							2.62041	0.546983	-1.7195	1.265	-1.55753	-1.74981	-2.72918	-0.416207		-2.16752	1.04697	-2.82715	-2.14384	-2.48158	-2.95546	-1.49137	2.9163
							2.47073	-0.379711	2.13071	-1.0973	-0.847266	2.73081	-2.14915	2.0299		-2.49667	1.01892	-1.7575	-1.38285	2.26921	-1.83583	-1.33669	1.99662
							-2.22709	-0.442143	-0.903551	2.6822	-2.37986	2.38039	-2.7675	-2.61745		-0.750288	0.351967	-2.44894	-0.636096	1.33601	-1.08035	-0.497882	1.39374
							-2.66174	1.71238	-1.60421	1.89437	-1.6554	3.1361	3.06634	2.24556		-2.09259	-1.76739	2.03631	1.30191	2.57048	-0.325829	-1.79461	0.504166
							3.00942	0.968463	-1.2202	0.645953	-0.878781	-2.10271	2.67755	0.901258		1.88271	-0.739861	3.03638	2.13959	1.09411	1.11203	2.27228	-0.545655
							3.12406	1.43025	-2.06988	-0.444221	-1.31004	-1.46566	2.55735	2.04797		-2.92269	0.00686833	2.51579	-2.87333	-1.26109	1.98321	1.43517	-1.28053
							2.81886	-2.48123	1.76382	-0.876264	0.515435	-0.601513	2.85554	0.369765		3.06089	-0.639202	-2.75942	-2.24588	2.35817	2.8698	0.429457	-2.82057
							2.76132	0.0789741	-1.94541	-3.09285	1.63775	-0.754326	-1.5708	-2.17896		3.13105	0.630167	2.88005	-1.56698	-0.266708	-1.95503	-0.318297	2.42658
							2.13766	-2.10303	2.5221	2.69966	2.63237	-0.871411	-1.65443	-1.72773		-2.66612	-0.286801	2.38294	-0.955256	-0.365357	1.28824	-1.22227	1.32749
							-0.301666	3.12737	3.0643	2.12244	-2.57452	-1.72765	1.04397	1.64649		-2.05296	0.574024	3.06331	0.0126126	-1.42157	1.34242	-2.01172	-0.0370865
							0.761938	2.84796	-0.449939	2.78713	-0.53847	-3.01218	-1.11883	-0.620249		-1.88136	1.58479	-2.8193	2.06625	-2.10955	1.73646	-1.35561	-1.3907
							1.4819	-3.05771	-1.05292	-3.10997	0.27882	-3.10379	-0.831875	2.21635		-2.72679	2.4281	2.1745	2.80348	-0.761749	-2.40292	-1.85069	-2.12685
							-2.60687	2.6015	3.13837	2.77905	2.85463	-2.51114	-2.71298	-0.574629		2.51378	-0.134157	1.32109	-2.60668	-2.61492	2.8786	-2.66732	1.79281
							0.868192	-3.04191	-2.09264	2.56739	-2.37417	0.704174	2.40088	-1.49423		2.2366	2.94879	2.04417	-1.79573	2.56632	-1.31216	2.85764	-0.625936
							1.7609	-2.52322	-2.36963	2.30881	0.376684	-2.69888	-0.753895	-3.04332		0.963819	-1.62901	2.70281	-0.660894	-0.0806228	-1.9853	2.05175	2.31489
							2.64773	-1.94015	-2.90955	0.252554	1.1367	-2.01317	2.59855	1.86816		2.61436	-0.158483	3.06891	0.28197	1.70651	-2.28288	1.36066	-0.603835
							1.47559	1.80871	-1.78947	-0.969509	0.105366	-2.30496	2.06813	-2.63865		2.191	0.524071	2.98452	1.45703	-0.567474	-2.99923	0.774051	-3.09307
							2.43984	0.868453		0.399883	-1.41364	2.79022	2.61695	-2.22958		2.65071	-0.660062	2.99929	2.54464	0.704039	2.74552	0.122193	3.09898
							1.92789	1.40159		1.1415	-3.01281	-3.10479	-0.554496	-2.28618		3.1289	2.41186	-2.92569	-3.11859	-1.2244	-2.52499	-0.497262	-2.55359
							-1.79914	2.04306		2.86273	-1.12217	3.01854	-1.33333	1.88697		3.09165	3.10483	-2.55637	-2.91277	-0.524173	3.132	-1.28409	2.76316
							1.78753	2.503		-2.86323	-2.95175	2.73424	-2.74725	0.569313		3.08544	-1.88483	-2.7434	-2.22932	-1.61474	-2.74317	-0.789374	-0.175736
							-1.55888	2.7838		2.78914	-2.12898	-2.93887	0.720776	2.83089		2.93138	-1.27874	-1.97838	0.804052	-2.25816	-1.70558	1.92996	2.65938
							-0.768521	-2.90753		-3.03532	3.07525	0.664371	2.11892	-1.41427		-2.92025	-1.33692	-2.47388	1.71788	-1.7515	-2.38206	2.61601	2.67492
							-1.72253	1.37117		-1.27063	-2.59411	1.65263	1.20321	3.13128		-2.79783	-2.30978	3.12451	2.62247	-2.48279	-3.1024	-2.7946	1.8496
							-0.313185	0.00956786		-1.95647	3.03679	3.08832	1.34795	-3.11953		2.78672	2.48881	2.67042	-2.61548	-1.71843	-0.466649	-1.6531	1.29632
							0.783511	0.935617		0.479741	-1.34523	-2.76089	-0.611502	2.13486		3.13271	1.32554	0.928209	-1.78558	-0.939696	-2.42457	-0.573282	-0.00982103
							3.08125	1.30138		2.10972	2.82151	-2.26349	-2.05338	-1.75501		-2.73573	1.79131	1.68101	-0.942357	1.089	3.14159	3.02418	-2.72702
							-0.544426	0.818772		-2.59667	3.01387	-3.08264	1.99651	-0.367488		3.04021	0.150316	2.32161	0.209761	2.14103	3.01372	2.89905	1.25616
							2.52504	2.59455			2.89371	-3.11829	1.18847	-1.9781		-2.77719	1.05123	3.08051	0.792146	-0.268684	-0.360695	3.13655	0.586773
							1.82153	3.12759			-0.796749	2.81984	0.370017	-1.51302		2.03577	0.591437	2.90645	1.38055	2.72421	-2.10137	2.71083	-1.39668
							2.62148	2.5054			-1.24257	1.7478	-0.445873	-2.99793		2.18084	-1.05289	-2.8433	0.646082	3.05327	1.65329	-2.91538	-2.13876
							2.32675	1.37054			-1.51783	1.2315	-1.47456	1.5006		1.22085	-1.84988	-2.04172	1.34341	-0.96383	-0.61809	-2.04849	1.65384
							1.84322	1.03314			3.01327	0.625409	-2.23071	1.45627		-2.2328	0.753477	-1.20644	0.910795	-0.480452	1.0466	0.394051	0.806521
							-0.752781	1.7588			1.86082	1.23455	2.86588	-1.9482		-1.35758	0.297433	-0.416634	0.985961	-1.7702	-0.574782	1.83171	1.67539
							-2.71402	-2.132			1.29353	2.45718	1.30256	-1.61006		-0.696508	0.729724	0.491341	0.394111	-2.07659	0.496801	-1.80171	0.0977189
							2.54563	-2.31828			-0.321472	0.741247	-2.38063	-2.00478		-2.51455	1.4497	-0.59793	-0.074155	-0.124897	1.17037	1.20581	1.13804
							-1.98466	1.9094			-2.12019	-1.84197	0.368449	-2.86772		2.81709	-0.385194	0.175989	-3.12792	1.28542	2.22649	-2.06628	1.87409
							-1.67914	2.31168			-2.65082	-2.93356	-1.99378	-2.15288		1.05236	1.73059	0.708959	3.12491	-1.29069	2.95573	2.58643	-2.76714
							-0.808627	0.781681			-0.549895	-2.03479	-1.05227	-2.77437		0.397846	2.44476	0.288862	-2.60466	-1.97379	-1.78852	-2.81236	-1.88055
							2.13096	1.93394			0.159704	-2.26553	-1.50779	2.08612		2.8137	3.05208	0.943145	-1.9235	-0.375961	-2.19392	-1.30624	2.70145
							-2.51749	2.6145			-2.58149		-2.63187	2.90623		-2.01284	-2.66688	1.80991	-1.40529	1.0553	-1.21941	-0.603303	-3.02409
							-1.68685	-2.52097			2.91827		-0.0785674	-2.79044		-1.34389	-1.83974	-2.9099	-1.03212	1.74879	0.0325618	0.0620915	2.43686
							0.625713	-1.66631			-1.57956		1.50527	-2.18568		-0.721477	-2.56355	-2.3943	-1.91749	2.97564	-2.92339	2.12524	3.06028
							1.78351	-1.0523			0.335658		2.39899	-2.90058		0.040308	2.69298	2.8613	-1.05812	-2.82175	-1.98092	2.85449	-2.02718
							2.7073	0.100074			2.05642		-2.96333	-2.58839		0.486942	1.72342	2.37972	0.816218	-2.37572	-0.910343	-3.06903	-1.61232
							-2.98686	1.42155			2.20551		-2.23709	-1.62364		0.114676	1.00972	-2.25972	0.104793	0.460992	-0.0821399	-2.56059	-1.8552
							-1.77346	2.62711			2.86332		-1.76907	-2.83897		-0.589747	-0.149858	-1.62674	1.01918	-2.55422	2.24068	-1.3773	-1.42859
							-1.85894	-2.52281			-3.08995		2.31463	-3.14074		-0.46365	-1.02958	-0.902487	1.53478	0.539187	-2.93374	-0.604988	-1.69825
							-1.20679	-1.2581			2.98224		-2.87833	1.90325		0.168132	-0.168005	0.141682	0.616031	-1.57498	2.8643	0.207049	-0.0405184
							1.00645	0.356801			2.9572		-2.49329	1.25054		-0.328989	-1.99108	1.71407	2.53985	-2.43754	-2.87073	0.844613	-0.982794
							-1.21488	-0.256017			2.94066		-2.91479	-0.807617		-1.60586	-1.861	2.46479	2.26074	0.0220376	1.45279	1.8684	-0.800683
							-2.20422	1.51471			-1.06037		-0.117932			-2.39608	-0.401653	-3.11893	3.04019	-0.647684	-1.69093	-1.09052	-1.34929
							1.14513	2.68387			1.13564		-2.55298			-3.02217	0.483616	-1.99529	1.47337	-1.39452	-2.10668	-0.922544	-2.94422
							1.95067	-3.122			-2.08743		-1.90023			2.45982	1.07181	-1.29889	2.41889	-2.85111	-0.976301	0.586194	-1.51413
							-1.91976	2.86836			-1.75437		-2.68718			1.13474	2.72214	-0.552894	1.69616	2.792	0.000538781	-1.04182	-2.61108
							3.09425	-2.82347			-0.79859		3.12958			0.37457	1.80809	2.00144	-2.95757	2.0658	0.686618	-2.19618	1.58305
							-1.50403	2.44346			-2.50553		-3.054			-0.537614	1.83056	2.79783	-1.80618	0.618871	2.2107	-3.13659	2.41467
							-2.5902	-0.540299			2.89133		2.90891			-2.51532	1.94614	3.14123	-2.42193	0.0208303	2.968	2.77105	2.77849
							-0.283318	-2.77127			2.76531		-1.81561			-2.05585	1.63259	-2.85416	-1.98576	-1.03668	2.40992	1.81948	1.49512
							-1.99368	2.44835			-3.07028		-2.84987			-1.59545	2.75729	2.84577	1.44034	-1.49483	-2.61942	0.722897	0.718138
							0.0615119	3.09888			-0.273648		2.92694			-2.40959	2.34674	-2.84459	2.34639	-3.04756	-1.81504	1.93294	-3.04143
							-0.916178	-3.01157			3.04535		-1.73006			-0.585235	1.25981	-2.39227	-3.10449	2.98757	-0.621046	-1.05148	-3.08327
							-1.73804	-2.3841			-2.54997		-2.46565			-1.35129	0.66122	-1.38236	2.7317	2.27433	0.197396	-0.795565	2.59543
							-1.54849	2.18263			-2.13622		2.58225			-1.88755	-1.852	-3.09391	1.16684	1.29658	0.952368	-1.24865	1.99467
							-1.09257	-1.99891			-2.51108		0.207084			-2.4352	-2.65326	-3.0679	1.7863	0.0673125	1.81577	-1.19369	-2.09048
							-1.95149	0.608565			-1.08153		1.06932			0.601388	2.57268	-2.73382	2.91379	-0.758144	2.69079	-1.9156	-2.73389
							2.64567	2.08651			-2.89967		1.62133			1.96813	1.53497	-2.06739	-0.139359	-1.87194	-2.68253	-2.6948	2.97126
							-1.93224	1.03721			0.748632		-0.868689			-2.53957	0.417986	-1.10317	-0.234833	-3.12587	1.76962	3.12895	1.97821
							0.155791	1.85631			3.13861		-1.55757			-1.8027	-0.406857	-0.49056	-0.949558	2.50265	2.38621	1.02019	1.55064
							2.6597	1.28707			3.02761		-2.31597			-0.774153	-1.19531	0.032802	-2.82807	1.48911	1.05635	0.976827	-1.4067
							1.86474	1.80755			-3.04386		0			-2.10917	-2.01102	3.01755	3.10038	0.159958	0.159913	2.95133	-0.947087
							2.80636	2.41144			-3.08909		1.18585			-2.49325	-2.81184	-3.09338	-2.70922	-0.534372	-2.02472	-1.05635	-0.309377
							2.04464	0.236281			2.53194		2.88327			-1.87793	2.7482	2.80895	-2.23822	-2.52868	-2.87977	-2.49438	0.0732228
							1.37128	2.07034			-2.02517		-2.67907			-2.55794	1.86913	-2.94109	-1.64733	1.0175	1.33122	-0.333859	0.6
							2.41485	-2.53758			-1.0748		-1.97644			-1.99431	1.10111	2.89065	-1.06898	-0.684202	2.95612	-1.28717	-0.149815
							1.90776	1.74857			1.32582		3.09564			-2.50607	0.229418	-3.0844	1.39828	-1.98849	0.706324	-2.21416	-0.726375
							2.15303	2.7399			-0.235641		-2.99098			-0.132822	-0.637889	2.84318	-2.40754	2.61831	2.30429	-1.97679	-0.160021
							1.22051	-2.21518			2.46756		-2.14539			2.49111	-1.79387	2.7926	1.33117	0.0148777	3.08284	1.6844	1.255
							-0.674384	-2.87981			3.14159		-2.48782				-2.5592	-3.00154	2.08644	-0.659951	-2.6691	-0.332923	-0.956199
							0.705914	-1.26623			2.66819		-1.92815				2.31768	2.67224	2.72297	-1.39007	-0.707686	-1.93713	-2.76009
							-2.47028	-0.562841			-2.83534		-3.11108				-1.14943	-0.748995	-2.95806	-2.62866	-0.945892	0.759763	-3.08949
							3.08727	-1.6802			-2.30277		3.10681				2.27073	-0.0857801	-3.11869	1.74263	-0.105526	-1.57383	2.07893
							3.09633	0.734122			-1.10852		-2.74593				0.940362	0.986416	-2.9075	1.84435	0.481938	2.35542	1.87808
							3.12308	1.26086			1.0951		2.45447				0.558961	1.76141	-1.9081	2.71573	1.10382	1.70647	2.75791
							3.11165	0.051636			-0.0223634		3.00976				1.53474	2.20338	1.85799	3.03247	-2.86668	-1.76186	2.01528
							-2.22025	1.78863			1.51474		-2.89485				2.03971	2.63802	2.6443	2.88446	-0.341356	-0.97328	-0.777653
							-1.55423	2.51277			1.66982		-2.84843				0.72997	-2.04697	-2.73294	-1.42635	2.29424	-2.8097	-0.227847
							3.137	1.84691			-0.570674		2.75203				2.30993	-1.29521	2.73531	-0.372343	0.548278	2.81294	-1.2181
							2.95877	3.07089			2.61447		-2.74042				1.61502	-0.0340736	0.449942	2.3991	-2.17396	1.93921	-0.134978
							-2.79386	1.58952			-3.13318		-2.76269				-3.0567	0.582821	-0.719189	-0.617393	1.78034	-0.977522	2.62653
							2.0435	-3.00186			-1.88222		-2.09538				2.54296	1.31048	0.96392	-0.120282	2.54801	-2.12175	1.75414
							0.723216	2.60095			1.30104		3.07716				-2.63417	2.13833	0.215995	2.86077	-3.06363	-3.10789	1.14727
							0.309881	-3.11867			1.80447		-2.4646				1.48834	-3.13604	3.02647	1.70163	2.7468	2.75525	0.450746
							1.04989	3.1299			-2.17294		-1.95678				-1.7257	-2.53186	0.392755	2.14102	2.1739	2.03498	2.02322
							-2.06001	-2.02405			1.36915		-1.69204				1.73665	-1.67235	-0.965938	-0.745211	-3.11425	0.769196	1.43943
							1.06646	-1.12263			2.6108		-2.3779				2.31759	-0.949639	-2.34512	-1.27957	1.99312	0.157222	1.84625
							1.23055	-2.76372			-2.41993		-1.41837				1.4926	-1.50655	-2.97544	-1.31163	1.97528	-0.438167	-2.25464
							2.00169	2.85479			2.45459		2.22855				-1.37752	-0.820626	-1.18138	1.16463	1.34871	-0.692997	-2.90976
							2.00563	-2.76366			2.617		2.22966				-2.0334	0.0729513	-1.93301	-0.294672	-0.26791	-1.62185	2.6621
							1.63451	-3.05646			-3.05594		2.98792				-2.8519	0.364929	-2.06651	-0.960799	-1.68159	-2.17179	1.73155
							3.03061	0.819557			2.9836		-3.051				1.70239	-0.237364	-0.616645	-1.51699	-2.26143	-0.311414	1.12359
							1.25419	-2.19883			-2.77204		3.12643				0.752124	-0.748689	-1.72653	0.653245	2.0742	1.83641	-1.2598
							0.265626	0.850293			-2.89562		-2.84486				0.227398	1.60182	-2.77988	1.31203		0.578353	-2.18656
							1.05943	2.64562			-2.36329		-2.49223				-2.23198	-2.77854		-2.81696		-0.973374	-2.70739
							-1.47459	-2.4184			-1.49194		3.00164				-1.51556	-0.289094		1.68712		-1.57218	3.05929
							0.251916	-0.561798			-1.93202		-3.09393				-0.800314	2.77334		-0.159053		-2.41451	2.27607
							-0.371909	0.208949			0.372894		2.39139				0.481221	2.28544		-0.650167		-2.91401	-0.438653
							-2.43672	-0.940436			0.38516		2.23589				1.52872	-2.96624		-2.76261		-2.02096	-1.72857
							2.99097	-1.0837			-1.38382		2.32633				2.68168	-2.05102		2.89744		1.24459	-2.38656
							-2.04687	0.539126			2.39461		3.09444				-2.76222	-1.43875		2.43027		2.88751	-1.7072
							0.742748	-1.587			2.75109		2.2081				-1.78886	-0.792181		-0.38082		-3.12419	-2.21059
							-0.426668	-2.6485			-2.91642		-2.68597				-0.605486	-0.212454		1.6369		2.91067	-3.05919
							-2.11075	-1.6158			2.74213		1.427				0.506706	0.755575		-1.63105		1.9797	2.36829
							-2.88497	2.74211			0.516865		-2.50372				1.06006	1.40941		1.47144		1.31019	2.89661
							2.84749	-2.97988			1.3222		-2.21517				2.68813	1.96283		-0.450543		2.00598	1.93749
							1.62127	-1.7437			1.84599		-1.79989				2.08073	2.86892		2.56272		1.65345	0.298499
							0.884488	-1.10303			-2.51401		-2.45442				3.08469	-2.86641		2.64062		0.415637	2.54187
							1.55132	-2.50502			1.30001		-2.66919				-2.69772	-1.29435		1.54239		1.39552	3.1381
							-0.152604	-2.6467			0.129789		-1.99838				-1.59261	3.08506		-2.90189		0.542601	-3.00847
							-1.07287	-3.02458			1.70944		-1.406				-0.833248	-2.10989		2.57486		1.81031	-2.24044
							-2.27076	2.48941			-3.10363		-1.90093				-0.236469	-1.45485		0.680635		2.74396	-2.53924
							-1.83224	1.37387			-0.182286		0.70636				0.981983	-0.884557		0.552268		-1.55413	-2.60965
							2.52233	0.193938			2.81106		2.5654				1.66585	-1.08843		-1.86821		2.63231	2.92756
							1.55093	0.188709			2.02825		1.4818				2.2039	-0.485556		-1.74411		-1.07746	-2.42621
							0.35621	-2.14523			-1.06278		3.07659				3.07484	0.502486		1.9108		-0.668289	-2.48298
							-2.79304	-1.53449			-0.289194		-2.657				-2.65835	-0.000507094		-0.912282		-0.857014	-1.63829
							2.1339	-0.93249			2.6853		-0.90546				-1.67184	0.790209				-0.661038	0.586475
							1.43789	-2.82615			1.85197		-0.335602				-1.53558	-0.188819				-0.0428126	-1.72153
							2.35187	2.45249			-1.37398		2.63929				-0.863048	0.36473				3.11806	0.745875
							1.93524	2.87207			-2.51343		1.07437				-1.33725	-0.255582				-1.78074	-2.50671
							2.54575	-2.77784			2.5306		1.2925				-0.835909	0.388982				-2.16666
							3.00129	-1.67496			1.91013						-3.13513	-1.89433				-1.67038
							2.15492	-0.571869			-0.390086						2.61309	0.0629601				-2.19099
							-3.11489	-0.0932064			0.909431						1.82813	1.00962				0.59303
							-1.50388	0.725461			2.78749						1.43539	3.0982				3.07717
							3.08562	-1.74984			2.29126						2.08322	-0.0915263				-1.60949
							-2.32697	-2.12518			-2.66626						1.58166	0.364081				-0.00896237
							-1.87705	1.17292			0.42977						0.54532	1.05788				-0.528927
							-1.07202	-1.97113			0.700496						0.117552	1.99498				-0.528074
							-1.56487	2.41814			2.14851						0.665765	1.69096				-0.297064
							0.443707	-2.59176			-1.25121						0.483655	2.63237				1.20075
							2.92229	2.67709			-0.793901						-0.621446	-2.93289				1.93635
							-2.31035	1.68344			-3.04803						-1.26931	-0.894138				-3.07055
							-1.37009	0.563555			1.65063						0.657545	-2.60101				2.67227
							3.10974	1.32297			2.39965						-0.164706	-3.06119				-2.85749
							-0.331082	2.04092			-1.46747						0.79682	-2.67638				-2.15841
							-2.4306	-2.51019			-1.97343						0.451518	2.7228				1.44646
							-1.63875	-1.75797			2.88908						0.904693	2.67423				-2.90567
							-0.97533	0.45989			3.0978						-2.74956	3.14011				1.9513
							1.07712	-0.0599457			2.23695						-1.04064	-2.77051				2.89883
							2.20353	0.629069			2.86413						1.08489	-2.24226				0.531472
							2.04091	1.24633			3.01588						2.46203	2.26986
							1.27591	-0.271855			-2.7174						-2.05418	-3.01765
							2.46827	-2.62257			0.170879						-1.11987	2.27994
							2.88743	2.23948			2.75596						-0.384168	0.640235
							2.06622	3.03967			-2.36918						0.53575	-0.060184
							-2.84328	1.8168			-1.39094						2.61657	0.539325
							2.63476	2.94948			-2.45392						1.83006	-0.285121
							1.98894	-3.04002			2.06325						2.14286	-0.00556975
							-1.58646	-2.75514			2.63652						-2.6281	-0.380907
							-0.702675	-2.136			-2.93077						2.49614	-0.367897
							0.656211	2.99366			-0.129918						1.93633	0.698351
							0.125188	-0.488714			-0.951111						2.803	1.19208
							-0.402865	1.198			0.941197						1.26086	2.12512
							2.06108	1.84192			-2.03444						0.709375	2.81374
							0.532508	0.971563			0.215861						1.49417	-2.90608
							-2.66409	-2.07266			-0.363419						2.57917	-2.37549
							1.70969	3.03362			0.332027						-2.82402	0.977279
							2.45155	0.516675			-0.188903						1.11903	2.12915
							0.0442334	-0.615765			0.235645						2.23917	-0.828814
							-2.61977	2.61022			2.53382						-2.74825	0.527277
							0.529296	2.3759			-1.79791						-1.43001	-1.42313
							2.77041	2.89402			2.13352						0.493006	-0.4667
							-2.80075	-2.93077			-1.9607						2.73242	2.71201
							-0.110815	2.84953			2.34917						1.10283	1.98199
							2.61257	-2.97727			1.34015						1.91075	2.94985
							-2.40456	2.91575			2.71486						2.77124	-2.82278
							-3.08954	2.36881			1.55868						-3.01788	2.70346
							2.60903	2.9576			1.23755						2.8797	-2.6113
							1.46348	1.04105			-2.75243						2.30167	3.03787
							0.869132	1.55717			-2.06894						2.86096	2.13249
							0.0348575	0.885362			-1.33308						1.64111	2.35718
							-0.5887	1.14818			0.777853						1.00747	1.41682
							-1.33131	0.414854			1.38457						1.79239	0.716042
							-2.52902	0.901028			0.152649						2.37908	0.148614
							3.10362	2.02919			1.2925						2.55856	0.401067
							2.5206	2.50142			-2.74399						-2.83659	-2.61937
							1.66481	0.927606			1.29682						-1.19194	-1.91284
							2.20753	0.0823498			-2.85258						2.93806	-1.47506
							-2.68986	2.88554			2.23328						2.57807	-1.46322
							-2.45884	-2.83346			-0.339041						-2.86533	-0.596828
							2.67885	-3.13769			0.714939						-0.708983	-1.24483
							-2.81853	-2.64344			1.22777						0.0989763	-0.360975
							-0.0124485	-2.86982									0.709946	1.83756
							1.05155	2.87882									1.69058	2.73016
							2.62692	-2.32801									0.725761	-2.61188
							-2.98266	-1.93102									1.38066	2.78291
							-0.54686	-2.68692									0.657481	-2.75652
							0.56924	-1.67779									0.0914218	-1.74346
							1.37751	-0.941993									1.86875	-1.33341
							1.56189	-0.0900661									1.41857	2.68543
							-2.82102	0.627361									2.36553	1.85887
							-2.22445	1.28004									3.10671	2.38834
							-2.74409	1.98647									-2.04624	-3.10418
							0.839847	2.53418									-1.43697	-2.4999
							2.62937	-2.67982									-2.55125	-0.332587
							1.83088	-1.81348									-1.94426	0.674566
							1.46033	1.4711									-1.03868	-2.64677
							-2.74421	-1.1471									-1.91996	-1.10183
							3.10047	0.426823									1.24277	-0.203549
							-2.86718	-0.598992									2.83903	0.357326
							2.79041	-1.50544									-2.94133	-0.266069
							1.6384	1.64023									-2.86132	-1.69563
							3.09485	-1.8322									0.925295	-2.48449
							2.47353	-1.53127									-0.125619	2.09804
							1.91764	1.65066									-2.34206	0.280341
							-1.7982	-1.95037									0.209882	2.70351
							3.00613	2.48946									1.2178	-3.11616
							0.342991	-2.40895									-0.670502	-2.79884
							-0.656867	1.56933									0.714965	3.0321
							0.813661	0.999815									-1.54803	-2.50037
							-2.13276	-2.57111									-0.160591	-1.5153
							-2.57844	-2.62183									-1.01188	-2.03901
							0.870349	-1.93333									-1.62334	-0.968996
							-0.964138	2.76214									-2.35262	-1.22407
							2.18829	-0.668427									3.13237	-0.306399
							2.93699	0.827914									2.65455	0.367889
							-2.5854	0.161266									-1.99122	1.23894
							2.91986	-1.15355									-0.831108	2.27196
							1.83125	0.230547									-3.00387	-2.82525
							2.80266	-2.69269									3.12611	2.5996
							2.57479	1.64838									-3.08515	1.88815
							1.2772	0.854715									-3.05308	2.49661
							0.398442	2.48388									3.14062	-2.60876
							-0.556324	1.96336									-3.06737	-2.39737
							-1.57303	2.66331									3.11329	-0.995983
							-2.93774	1.62164									-3.14134	-1.92554
							3.13942	2.66909									2.87336	-0.920439
							-1.48994	-2.99626									-0.0800522	-0.382921
							-1.8225	2.75013									-1.84169	-1.26433
							-1.36042	-2.42182									-1.13096	-0.541984
							-2.6729	-1.77263									0.163601	0.363777
							-1.11612	1.31306									-2.3811	1.04975
							2.99079	2.54429									-3.12186	1.57549
							-0.284455	1.28481									2.77358	2.25495
							2.18016	0.879011									2.04501	-3.06299
							2.19583	1.95726									1.4956	-1.51494
							1.58824	-0.412682									0.781664	-2.28536
							0.853025	-0.611813									2.21789	-2.89093
							1.32196	1.30042									1.40208	2.53894
							2.19307	-2.83355									-2.68073	2.06882
							2.13427	-0.871502									2.84898	2.77014
							1.6095	2.27031									1.64712	2.03607
							2.58947	-2.59724									-1.48823	2.80186
							-2.95509	-0.764806									-2.10542	2.48849
							2.31718	-1.39968									-2.67045	2.78888
							1.46799	-2.18992									0.979082	-2.10659
							1.18038	-2.94496									-1.26897	-1.13702
							0.967831	2.76332									2.35538	-0.434408
							-1.39597	1.77081									1.89505	0.53046
							-1.94183	0.77586									1.26157	0.576095
							2.71451	-0.587998									0.585402	1.23617
							-0.0182142	-1.56031									3.00427	0.440016
							1.43634	1.53722									-2.86945	-0.185502
							2.39659	2.35841									2.81732	1.39833
							-2.14709	1.10837									2.42705	1.85583
							2.7534	-0.406323									1.7574	2.76298
							1.94364	-1.84798									0.448332	2.50254
							-1.74053	-2.48531									1.35738	0.618556
							-2.26671	2.75417									0.521556	1.16869
							-0.284315	-0.555304									1.81072	0.763207
							2.97604	0.197469									-2.69844	1.52256
							-2.65729	-2.01063									-2.0044	1.97632
							-1.98128	1.42706									-0.994952	-2.36883
							-1.02872	2.2172									-1.12801	1.32919
							-2.70061	2.47038									0.70553	2.86387
							3.10673	-2.73271									2.04595	-1.89066
							-2.47768	-2.57818									-0.723867	-1.21745
							-3.05747	-1.84029									1.99268	-0.265714
							2.92141	-0.418908									2.58511	0.255137
							0.111221	-0.057628									-1.48605	-1.22238
							0.833716	1.1563									-0.756986	0.609906
							1.8847	2.43126									0.768275	1.91418
							1.63784	-2.52207									1.98482	-2.21096
							-2.1315	-1.66399									-1.93173	1.79766
							2.27224	-2.01956									1.76572	2.18473
							1.72437	0.671109									2.51147	2.89876
							-2.51917	-1.10181									-2.84221	3.08278
							-1.1803	-1.19774									3.11204	-2.47725
							1.5917	-0.370017									2.03998	-1.89432
							2.12505	-2.67534									-1.57183	-2.70337
							2.83146	2.17212									-1.49492	-2.12484
							1.46516	2.04032									0.13731	-1.61914
							1.99323	-0.108452									-0.348876	-1.75044
							-0.462722	0.349116									0.308552	-2.14039
							-1.63822	-0.0047543										-1.37116
							-3.06232	0.596003										-0.169201
							2.39392	-0.498461										0.38608
							-2.74667	2.70781										-0.673681
							-0.57443	2.81937										-1.84699
							0.303796	-1.64551										1.59165
							-1.68472	-2.08869										0.558693
							1.25492	1.83491										1.02559
							0.476095	-1.02146										2.31333
							0.423691	2.19123										1.98984
							-3.05685	1.78188										-2.83012
							0.0315661	-1.54167										-2.12146
							1.18064	-0.233157										-1.75896
							1.98777	-3.03941										-2.71508
							3.11244	-0.222351										1.93669
							-1.94002	0.417282										1.79192
								1.1252										2.07795
								2.4894										-2.8304
								-0.697335										2.37421
								0.941588										3.04099
								-2.49938										-2.39122
								-2.18769										-0.470122
								-2.47094										-0.00621603
								-2.07904										0.624562
								-2.86755										1.44392
								2.96565										2.63067
								-0.158848										1.46547
								2.19014										2.0398
								-2.89473										-0.614527
								-2.1051										0.161448
								-2.77845										1.1251
								-2.0492										2.59977
								-0.467863										1.29134
								0.923918										0.664682
								1.80869										0.460349
								2.53412										0.932259
								-3.06695										0.538301
								2.44337										0.834723
								2.02003										0.0363668
								-2.60714										1.21483
								2.85018										1.49819
								2.11232										0.246485
								2.17597										2.87609
								0.761029										2.63485
								-2.21494										3.13457
								0.74255										3.09874
								-2.41035										2.80814
								1.19535										2.26152
								2.28131										-0.828073
								1.27126										2.12722
								-0.743212										1.78243
								0.395174										1.09506
								1.85905										2.2864
								-0.725983										0.529037
								0.0526396										-0.241377
								1.62516										0.725958
								0.0254896										1.52373
								0.720253										2.08183
								1.11376										1.11866
								0.175544										0.990425
								-2.4918										0.390494
								-1.78875										0.0357279
								0.385261										0.715953
								2.3617										-0.80625
								3.06912										-2.2934
								-2.76215										-2.99591
								-1.33266										-1.12967
								-2.92707										-0.328132
								-2.72472										1.1018
								-2.72381										-2.28853
								0.245155										-1.40865
								1.76274										-0.658528
								1.63807										-0.113654
								2.76277										-1.60952
								2.42237										-0.711699
								-1.1139										-0.0915131
								0.49001										1.11315
								-0.548345										2.60442
								0.571126										1.71588
								-0.837551										2.38449
								-0.542096										3.10126
								0.508031										-1.99088
								-2.31343										-1.86193
								1.29018										-0.328875
								2.01088										-0.314148
								1.44643										1.53824
								0.80464										2.0885
								1.3638										2.73894
								2.30346										0.659772
								-3.05358										0.0651536
								-2.19562										-0.932398
								0.691824										-1.90109
								-0.275845										-2.75197
								1.32577										-0.858047
								2.11217										-2.30751
								1.41462										-1.33766
								1.10069										-0.713435
								1.84885										1.35472
								2.93899										1.93766
								1.8903										0.243355
								0.389623										2.81055
								-0.481323										-3.02865
								-1.66831										-3.00195
								2.83149										0.553981
								2.09497										2.97379
								0.895108										0.993432
								-0.669974										-0.493435
								1.05921										-0.565813
								2.50842										0.561213
								-2.46583										2.31139
								-1.48744										1.54234
								2.03069										1.34385
								2.63231										0.590547
								3.10125										0.163741
								-1.39102										-1.09179
								-2.50938										-0.459192
								-2.23108										-2.31852
								2.54861										-1.74604
								-2.805										-1.45465
								-2.59705										0.21846
								2.95368										1.09584
								-2.07902										1.1709
								-1.49662
								-0.661537
								-0.406176
								-0.0582882
								-0.98576
								-2.83338
								2.01765
								1.90382
								2.4604
								3.02306
								2.04922
								2.63565
								2.78093
								-2.85169
								-1.54189
								-0.901585
								-2.70874
								-1.0026
								-1.77131
								1.48298
								-1.91805
								-1.486
								-2.78267
								-2.01927
								-2.64902
								-1.27208
								-1.33214
								1.95762
								2.2853
								-0.526233
								-1.9474
								2.73582
								-2.67414
								2.54657
								-2.90644
								-2.1301
								-1.51551
								1.72677
								-0.285638
								3.0545
								-2.7214
								-3.11068
								2.65702
								2.1178
								1.33889
								2.17481
								0.0367889
								1.35077
								1.78762
								-3.08803
								2.84365
								0.72642
								-1.24239
								1.55227
								-0.234202
								0.0260831
								-1.44066
								2.99421
								-2.45408
								-1.79498
								-1.09668
								-0.498871
								-1.16868
								1.58721
								-0.97301
								-2.96209
								3.07902
								2.83238
								-0.0964431
								2.03588
								2.80389
								-2.50632
								-2.44325
								0.6585
								2.236
								1.50974
								2.20635
								-1.14796
								0.798664
								-2.41076
								-3.08993
								2.98982
								-2.84434
								-2.11457
								2.91331
								0.957265
								-2.94075
								0.473385
								-0.0649984
								-0.652618
								2.14418
								0.867141
								1.45465
								0.615275
								-0.247721
								-0.958386
								2.53717
								1.21377
								0.3869
								-2.06805
								0.846769
								1.65112
								2.01951
								1.27972
								0.717169
								0.180108
								0.668876
								2.46721
								1.00783
								2.8145
								-2.59452
								-1.94297
								0.154728
								-2.74259
								1.35374
								-2.03637
								2.19244
								2.86174
								0.252147
								2.1448
								1.1262
								-3.02613
								-1.01836
								2.98027
								0.202492
								0.222999
								2.5182
								-0.45802
								-0.692893
								-2.7427
								3.08178
								0.0702748
								-2.02152
								0.486138
								0.98035
								0.840724

## Sheet: Fig 1E
Fed	Stv
T*	T*
20.36	19.8
20.29	19.34
20.1	19.62
19.99	19.65
19.12	18.96
19.02	18.89
18.96	19.1
18.79	18.76
19.02	18.74
19.51	18.96
19.64	19.05
19.54	18.74
19.42	18.96
19.12	19.26
19.24	19.18
18.79	18.94
19	18.94
19.1	18.8
19.83	19.89
19.89	19.64
19.92	19.81
19.72	19.72
19.81	19.81
19.81	19.78
20.06

## Sheet: Fig 1F
		AIY
frame (2Hz)		wt-fed	wt-stv
1 to 30		0.1136	0.1395
31 to60		0.0909	0.093
61 to 90		0.0909	0.1395
91 to 120		0.0227	0.186
121 to 150		0.0682	0.2326
151 to 180		0.1364	0.2558
181 to 210		0.1591	0.2558
211 to 240		0.2273	0.1628
241 to 270		0.2273	0.2558
271 to 301		0.3182	0.3023
301 to 330		0.3182	0.2791
331 to 360		0.2955	0.3023
361 to 390		0.2727	0.2558
391 to 420		0.2955	0.2326
421 to 450		0.3182	0.2093
451 to 481		0.3409	0.1628

## Sheet: Fig 1G
AIY(16-27)
wtfed	wt-stv		time (s)
0.4545	0.3953		0
0.4545	0.3953		0.5
0.4545	0.3953		1
0.4545	0.3953		1.5
0.4773	0.3953		2
0.4773	0.3953		2.5
0.4773	0.3953		3
0.4773	0.3953		3.5
0.5	0.4419		4
0.5227	0.4419		4.5
0.5227	0.4419		5
0.5455	0.4419		5.5
0.5455	0.4419		6
0.5455	0.4651		6.5
0.5455	0.4651		7
0.5682	0.4651		7.5
0.5682	0.4651		8
0.5682	0.4651		8.5
0.5682	0.4651		9
0.5682	0.4651		9.5
0.5682	0.4651		10
0.5682	0.4884		10.5
0.5682	0.4884		11
0.5682	0.4884		11.5
0.5682	0.4884		12
0.5682	0.4884		12.5
0.5682	0.5116		13
0.5909	0.5116		13.5
0.5909	0.5116		14
0.5909	0.5116		14.5
0.5909	0.5116		15
0.5909	0.5116		15.5
0.6136	0.5116		16
0.6136	0.5116		16.5
0.6136	0.5116		17
0.6136	0.5116		17.5
0.6136	0.5116		18
0.6136	0.5116		18.5
0.6136	0.5116		19
0.6136	0.5116		19.5
0.6136	0.5581		20
0.6364	0.5581		20.5
0.6364	0.5581		21
0.6364	0.5581		21.5
0.6364	0.5581		22
0.6364	0.5581		22.5
0.6364	0.5581		23
0.6364	0.5814		23.5
0.6364	0.5814		24
0.6364	0.5814		24.5
0.6364	0.5814		25
0.6364	0.5814		25.5
0.6364	0.5814		26
0.6591	0.5814		26.5
0.6591	0.5814		27
0.6591	0.5814		27.5
0.6591	0.6047		28
0.6591	0.6047		28.5
0.6591	0.6047		29
0.6591	0.6047		29.5
0.6591	0.6047		30
0.6591	0.6047		30.5
0.6591	0.6047		31
0.6591	0.6047		31.5
0.6591	0.6047		32
0.6591	0.6047		32.5
0.6591	0.6047		33
0.6591	0.6047		33.5
0.6591	0.6047		34
0.7045	0.6047		34.5
0.7045	0.6047		35
0.7045	0.6047		35.5
0.7045	0.6047		36
0.7273	0.6047		36.5
0.7273	0.6047		37
0.7273	0.6047		37.5
0.7273	0.6047		38
0.7273	0.6047		38.5
0.7273	0.6047		39
0.7273	0.6047		39.5
0.7273	0.6047		40
0.7273	0.6047		40.5
0.7273	0.6047		41
0.7273	0.6047		41.5
0.7273	0.6047		42
0.7273	0.6279		42.5
0.75	0.6279		43
0.75	0.6279		43.5
0.75	0.6279		44
0.75	0.6279		44.5
0.75	0.6512		45
0.75	0.6512		45.5
0.75	0.6512		46
0.75	0.6512		46.5
0.75	0.6512		47
0.75	0.6512		47.5
0.75	0.6512		48
0.7727	0.6512		48.5
0.7727	0.6512		49
0.7727	0.6744		49.5
0.7727	0.6744		50
0.7727	0.6744		50.5
0.7727	0.6744		51
0.7727	0.6744		51.5
0.7727	0.6744		52
0.7955	0.6744		52.5
0.7955	0.6744		53
0.7955	0.6977		53.5
0.7955	0.6977		54
0.7955	0.6977		54.5
0.7955	0.6977		55
0.7955	0.6977		55.5
0.8182	0.7209		56
0.8182	0.7209		56.5
0.8182	0.7209		57
0.8182	0.7209		57.5
0.8182	0.7209		58
0.8182	0.7209		58.5
0.8409	0.7209		59
0.8409	0.7209		59.5
0.8409	0.7209		60
0.8409	0.7442		60.5
0.8409	0.7442		61
0.8409	0.7674		61.5
0.8409	0.7674		62
0.8409	0.7674		62.5
0.8409	0.7674		63
0.8409	0.7674		63.5
0.8409	0.7674		64
0.8409	0.7674		64.5
0.8409	0.7674		65
0.8409	0.7674		65.5
0.8409	0.7674		66
0.8409	0.7674		66.5
0.8409	0.7674		67
0.8409	0.7907		67.5
0.8409	0.814		68
0.8409	0.8372		68.5
0.8409	0.8372		69
0.8409	0.8372		69.5
0.8409	0.8372		70
0.8409	0.8372		70.5
0.8409	0.8372		71
0.8409	0.8372		71.5
0.8409	0.8372		72
0.8409	0.8372		72.5
0.8409	0.8372		73
0.8409	0.8372		73.5
0.8409	0.8372		74
0.8409	0.8605		74.5
0.8409	0.8605		75
0.8409	0.8605		75.5
0.8409	0.8605		76
0.8636	0.8605		76.5
0.8636	0.8605		77
0.8636	0.8605		77.5
0.8636	0.8605		78
0.8636	0.8605		78.5
0.8636	0.8605		79
0.8636	0.8605		79.5
0.8636	0.8605		80
0.8636	0.8605		80.5
0.8636	0.8605		81
0.8636	0.8605		81.5
0.8636	0.8837		82
0.8636	0.8837		82.5
0.8636	0.907		83
0.8636	0.907		83.5
0.8636	0.907		84
0.8636	0.907		84.5
0.8636	0.907		85
0.8636	0.907		85.5
0.8636	0.907		86
0.8636	0.907		86.5
0.8636	0.9302		87
0.8636	0.9302		87.5
0.8636	0.9302		88
0.8636	0.9302		88.5
0.8636	0.9302		89
0.8636	0.9302		89.5
0.8636	0.9302		90
0.8636	0.9302		90.5
0.8636	0.9302		91
0.8636	0.9302		91.5
0.8636	0.9302		92
0.8636	0.9302		92.5
0.8636	0.9302		93
0.8636	0.9302		93.5
0.8636	0.9302		94
0.8636	0.9302		94.5
0.8636	0.9302		95
0.8636	0.9302		95.5
0.8636	0.9302		96
0.8636	0.9535		96.5
0.8636	0.9535		97
0.8636	0.9535		97.5
0.8636	0.9535		98
0.8636	0.9535		98.5
0.8636	0.9535		99
0.8636	0.9535		99.5
0.8636	0.9535		100
0.8636	0.9535		100.5
0.8636	0.9535		101
0.8636	0.9535		101.5
0.8864	0.9535		102
0.8864	0.9535		102.5
0.8864	0.9535		103
0.8864	0.9535		103.5
0.8864	0.9535		104
0.8864	0.9535		104.5
0.8864	0.9535		105
0.8864	0.9535		105.5
0.8864	0.9535		106
0.8864	0.9767		106.5
0.8864	0.9767		107
0.8864	0.9767		107.5
0.8864	0.9767		108
0.8864	0.9767		108.5
0.8864	0.9767		109
0.8864	0.9767		109.5
0.8864	0.9767		110
0.8864	0.9767		110.5
0.8864	0.9767		111
0.8864	0.9767		111.5
0.8864	0.9767		112
0.8864	0.9767		112.5
0.8864	0.9767		113
0.8864	0.9767		113.5
0.8864	0.9767		114
0.8864	0.9767		114.5
0.8864	0.9767		115
0.8864	0.9767		115.5
0.8864	0.9767		116
0.8864	1		116.5
0.8864	1		117
0.8864	1		117.5
0.8864	1		118
0.8864	1		118.5
0.8864	1		119
0.8864	1		119.5
0.8864	1		120
0.8864	1		120.5
0.8864	1		121
0.8864	1		121.5
0.8864	1		122
0.8864	1		122.5
0.8864	1		123
0.8864	1		123.5
0.8864	1		124
0.8864	1		124.5
0.8864	1		125
0.8864	1		125.5
0.8864	1		126
0.8864	1		126.5
0.8864	1		127
0.8864	1		127.5
0.8864	1		128
0.8864	1		128.5
0.8864	1		129
0.8864	1		129.5
0.8864	1		130
0.8864	1		130.5
0.8864	1		131
0.8864	1		131.5
0.8864	1		132
0.8864	1		132.5
0.8864	1		133
0.8864	1		133.5
0.9318	1		134
0.9318	1		134.5
0.9318	1		135
0.9318	1		135.5
0.9318	1		136
0.9318	1		136.5
0.9318	1		137
0.9318	1		137.5
0.9318	1		138
0.9318	1		138.5
0.9318	1		139
0.9318	1		139.5
0.9318	1		140
0.9318	1		140.5
0.9318	1		141
0.9318	1		141.5
0.9318	1		142
0.9318	1		142.5
0.9318	1		143
0.9318	1		143.5
0.9318	1		144
0.9318	1		144.5
0.9318	1		145
0.9318	1		145.5
0.9318	1		146
0.9318	1		146.5
0.9318	1		147
0.9318	1		147.5
0.9318	1		148
0.9318	1		148.5
0.9318	1		149
0.9318	1		149.5
0.9318	1		150
0.9545	1		150.5
0.9545	1		151
0.9545	1		151.5
0.9545	1		152
0.9545	1		152.5
0.9545	1		153
0.9545	1		153.5
0.9545	1		154
0.9545	1		154.5
0.9545	1		155
0.9545	1		155.5
0.9545	1		156
0.9545	1		156.5
0.9545	1		157
0.9545	1		157.5
0.9545	1		158
0.9545	1		158.5
0.9545	1		159
0.9545	1		159.5
0.9545	1		160
0.9545	1		160.5
0.9545	1		161
0.9545	1		161.5
0.9773	1		162
0.9773	1		162.5
0.9773	1		163
0.9773	1		163.5
0.9773	1		164
0.9773	1		164.5
0.9773	1		165
0.9773	1		165.5
0.9773	1		166
0.9773	1		166.5
0.9773	1		167
0.9773	1		167.5
0.9773	1		168
0.9773	1		168.5
0.9773	1		169
0.9773	1		169.5
0.9773	1		170
0.9773	1		170.5
0.9773	1		171
0.9773	1		171.5
0.9773	1		172
0.9773	1		172.5
0.9773	1		173
0.9773	1		173.5
0.9773	1		174
0.9773	1		174.5
1	1		175
1	1		175.5
1	1		176
1	1		176.5
1	1		177
1	1		177.5
1	1		178
1	1		178.5
1	1		179
1	1		179.5
1	1		180
