# Supplementary material for: Feeding state functionally reconfigures a sensory circuit to drive thermosensory behavioral plasticity
Source: eLife. 2020 Oct 19;9:e61167. doi: 10.7554/eLife.61167 (PMC7644224; doi:10.7554/eLife.61167)
Supplement: Figure 2—figure supplement 1—source data 1. [file elife-61167-fig2-figsupp1-data1.xlsx]

## Sheet: Sheet1
Panel A																																														Panel B
Fed (-His)							Fed (-His)	Fed (-His)	Fed (-His)	Fed (-His)	Fed (-His)	Fed (-His)	Fed (-His)		Stv (-His)	Stv (-His)	Stv (-His)	Stv (-His)	Stv (-His)	Stv (-His)	Stv (-His)	Stv (-His)		Fed (+His)	Fed (+His)	Fed (+His)	Fed (+His)	Fed (+His)	Fed (+His)	Fed (+His)	Fed (+His)	Fed (+His)	Fed (+His)		Stv (+His)	Stv (+His)	Stv (+His)	Stv (+His)	Stv (+His)	Stv (+His)	Stv (+His)	Stv (+His)	Stv (+His)	Stv (+His)		WT_NGM-IAA	WT_Histamine-IAA		odr-1p_hiscl1_NGM_IAA
degrees (pi, max)			turn number in each range	fraction	degrees		0.922426	-1.04175	-2.65452	2.4603	2.81868	-1.30243	1.64477		0.735357	-1.10846	-0.128539	-2.88025	-2.0839	-0.159207	2.79958	1.5904		0.922426	-0.902716	-2.37548	2.81868	1.79089	-2.99304	2.55547	-2.30672	-2.50662	3.05798		3.08966	-2.90425	2.53008	-2.7951	-1.17138	1.89688	-2.82421	1.92365	2.59616	1.94293		0.64	0.7247		0.54945
-3.14159	<=-3.14159265358979	0	0	0			-2.40495	-0.434254	0.379648	-2.88767	-2.74011	-1.9389	2.40216		-0.261774	-2.02959	1.4822	1.91734	-2.54321	2.70797	1.39603	2.64106		-2.40495	2.55219	0.100214	-2.74011	0.808902	2.88956	-2.16207	2.53843	-1.55017	3.11911		1.74994	-1.97063	1.77966	0.677279	1.89615	1.013	-1.87923	2.50628	2.02124	-2.95028		0.82873	0.68		0.70811
-2.35619	<=-2.35619449019234	282	282	0.180077	-180 to -135		0.826852	0.771877	-0.133215	2.96189	-1.94454	0.470033	-1.33775		-1.63327	-2.59627	-1.40359	-2.90858	-1.95778	-1.79043	0.568936	1.47878		0.826852	1.59346	0.697226	-1.94454	0.0979152	-3.00489	-0.625979	-2.78965	-0.581699	2.88537		0.278991	2.26603	0.796809	1.36928	2.56755	-1.57746	-1.14507	-2.30588	-1.37623	0.540572		0.94629	0.65833		0.56897
-1.5708	<=-1.5707963267949	465	183	0.116858	-135 to -90		2.65305	1.74483	-2.24513	2.1165	-2.74378	-2.50237	1.45437		-2.30828	-1.24965	-0.105289	1.81341	-1.11449	-0.200072	2.37721	2.11111		2.65305	-2.11367	2.30753	-2.74378	2.97767	1.84548	0.650422	-1.93256	0.0565299	2.00986		0.77506	2.1518	0.150256	-1.55396	-2.46498	-1.0541	-0.68735	-1.14165	-1.02889	-1.65949		0.10976	0.96667		0.4918
-0.785398	<=-0.785398163397448	631	166	0.106003	-90 to -45		-1.39732	2.77116	2.04874	2.72776	2.9376	2.17691	1.0354		2.45048	-2.35225	0.558134	2.70731	-0.197175	0.855248	0.911575	-0.349252		-1.39732	-1.42189	-3.05877	2.9376	-2.91974	0.980092	1.27675	-0.762478	-0.399548	2.85889		3.05507	0.807063	0.218677	1.83818	-0.0324455	-2.0309	-0.0426778	-0.470888	0.752185	2.7315		0.26147	0.63968		0.43103
0	<=0	762	131	0.0836526	-45 to 0		2.97686	-2.94542	2.18365	2.04509	-2.71383	2.83561	-2.08949		1.71886	-2.74641	-2.1997	-2.90955	0.480368	1.7898	0.10936	-2.01479		2.97686	0.500835	-1.89348	-2.71383	2.15316	1.61328	-2.67274	0.030052	2.13752	-3.03095		2.56146	-0.00158242	-1.50698	-1.09884	0.500623	1.21827	0.823713	0.786365	2.68918	1.40999		0.608	0.26147		0.328
0.785398	<=0.785398163397448	899	137	0.087484	0 to 45		-2.28541	-2.31616	2.54883	-0.683809	-0.144641	1.86501	-2.45108		0.717442	-1.23962	-1.61645	-0.37515	1.22222	-0.63249	-0.056278	-2.78356		-2.28541	0.980878	-2.6781	-0.144641	2.58411	2.19724	2.00721	-2.78685	-0.795738	2.83798		2.515	1.94606	-2.36569	-1.80294	1.87163	1.41706	1.96425	-2.75957	-2.99043	-2.73841		0.89121	0.23		0.81928
1.5708	<=1.5707963267949	1074	175	0.11175	45 to 90		-0.481339	-1.70255	1.89223	-2.80237	1.89027	-1.87211	-1.77919		-0.570033	-1.85316	-2.01566	1.73749	2.09724	1.54991	-0.497384	2.74304		-0.481339	0.00563352	-0.262517	1.89027	1.76438	2.59847	-2.13047	-0.889262	0.237003	-0.820913		2.71528	0.0622834	0.314794	2.66035	0.832086	0.641663	-3.11914	-2.13657	2.54706	-2.16489		0.7821	0.93413		0.91892
2.35619	<=2.35619449019234	1276	202	0.128991	90 to 135		2.72204	-0.820267	0.178549	2.79816	-1.30877	0.996151	-2.56417		2.73238	2.86022	-1.04619	-1.82933	2.73252	-0.757046	-1.9834	-2.42796		2.72204	-0.46979	0.601859	-1.30877	-3.02993	2.61209	1.09028	2.73536	0.159429	3.06517		-1.1932	-0.763181	2.1227	-2.99605	2.89012	-2.16365	2.62054	-1.55908	0.70412	1.83807		0.84746	0.98944		0.71765
3.14159	<=3.14159265358979	1566	290	0.185185	135 to 180		-0.042394	0.0763639	3.05674	0.448889	-2.47356	-1.61584	-1.78524		-2.74207	1.35155	1.47364	-1.1796	-2.6633	-0.141632	2.18351	-1.41156		-0.042394	-0.458174	1.41455	-2.47356	-0.520923	-3.13611	1.89129	-1.42772	-1.22928	-2.31254		-0.648038	-1.65868	-1.57222	2.02824	-3.01486	-1.50186	1.33911	2.55894	2.00382	-2.59286		0.97887	0.93023		0.8
			1566				2.89273	1.80486	2.72117	-1.65587	-0.800737	1.64969	-1.36167		3.13581	-2.21865	2.78928	-0.771849	-1.25676	0.658038	0.990079	-0.979553		2.89273	0.950475	1.47891	-0.800737	-0.764338	2.50532	2.54035	-0.532968	0.175844	-0.424627		-0.147531	-0.00918978	-3.06269	-2.39116	-2.40915	-3.131	3.00336	-3.09229	2.60742	-2.13114		0.82081	0.92708
							-2.84343	1.4237	-0.477541	-3.00297	0.368429	0.933165	-0.687782		-0.657811	1.83138	-2.71751	0.0938085	-0.628745	1.76258	-0.0344667	-2.04092		-2.84343	1.88103	2.79159	0.368429	-0.138546	-1.79653	1.84692	0.238032	-1.34995	-1.27484		1.78503	-0.810161	-2.74037	2.26599	-1.6275	-0.150201	-2.77523	-3.1044	-1.38832	2.85385			0.94595
							0.273641	1.16695	-1.12763	-2.55165	-2.8471	-0.079877	-1.44884		0.608852	-2.61385	-1.37606	0.694209	0.220041	2.84234	-0.747208	-0.494909		0.273641	2.37001	-2.88483	-2.8471	-1.52034	-2.4271	-2.82246	-3.10266	2.23103	-2.76022		0.922858	-1.67778	2.99734	-0.563815	0.31747	-1.04515	-2.0828	-2.53058	-3.07444	-2.51441
							1.08132	1.93425	2.24967	0.781569	3.06575	-1.69438	-2.456		1.18338	2.86753	3.06556	0.180376	0.997978	-0.57324	-2.72414	0.165604		1.08132	2.26834	-1.69877	3.06575	1.30523	-2.40955	-0.281456	-2.69471	2.93476	2.74657		1.88567	-2.38438	-2.17263	-1.74182	2.30106	-1.2518	2.65984	-1.25728	2.80667	-1.57249
							0.974661	1.04257	1.47136	1.90929	-2.2677	-2.39641	-1.93659		-2.76161	1.68735	-2.65785	0.506262	1.63322	-3.08351	2.74913	2.54779		0.974661	-2.29744	2.44993	-2.2677	2.05792	-2.53005	-0.372073	3.11462	-1.22496	1.6196		2.69223	2.18533	-1.72253	-1.19713	-2.818	-1.94667	-1.68935	2.70989	3.06394	-0.805293
							1.81137	0.408331	0.289102	3.07794	-1.70958	1.54713	-1.49633		2.70487	1.2161	-0.882366	2.06419	2.4324	3.0691	2.37088	2.7073		1.81137	-1.23708	-2.96568	-1.70958	2.41332	-1.64667	0.237007	-2.18121	-2.2696	-2.58121		2.20396	1.17036	-2.04785	-0.539306	-2.17315	-2.75133	0.179157	-2.73586	2.5995	0.449521
							-0.825566	1.12945	2.46545	0.123051	2.81371	0.713754	-2.79889		-0.712428	-2.85658	0.349833	2.81121	3.10051	-2.21384	2.8647	0.278529		-0.825566	2.52419	1.97756	2.81371	-2.9452	2.13982	-3.11329	-0.759671	-2.86922	2.9229		1.51461	0.310578	-1.99459	-1.01961	-0.483443	-2.22231	0.949517	-2.57529	-3.12127	-2.2807
							-0.311121	1.81868	2.56262	2.98444	2.05193	0.0937828	2.08838		0.332696	1.62712	1.8507	-2.44488	-2.64664	-0.746559	2.54309	-0.440616		-0.311121	1.6759	3.13368	2.05193	2.26582	2.82573	-2.57059	2.99777	3.09888	-2.84668		-0.750969	-0.500425	-2.07805	-0.778249	0.425048	-2.44033	2.01837	3.08587	-2.77215	2.321
							2.44886	1.75746	-2.64906	-2.1616	2.14319	-0.542273	-0.365199		0.758063	0.757807	-2.05838	-0.105063	-1.88522	0.331165	1.6905	-2.37862		2.44886	-1.81299	-2.82563	2.14319	-2.85366	-2.40024	-1.84687	-2.90511	-1.04659	2.64304		-2.49586	-1.50999	-1.81749	-2.32322	2.02487	1.98137	-2.31496	2.61249	-1.91695	3.09817
							1.8216	3.08043	-2.24771	-2.84498	-1.86568	-1.30284	-1.8669		1.76135	2.57467	-2.65947	1.44006	-1.12939	1.04178	2.15787	0.891091		1.8216	1.50252	2.81291	-1.86568	-0.463348	-2.93522	-1.02431	2.12825	-1.81383	0.873221		-3.00215	-2.17921	-1.0814	-1.63527	2.60659	2.32467	-0.926415	1.82111	-2.58626	-2.52438
							2.24962	-0.713158	1.74499	-0.968523	3.13426	1.60783	1.37518		-1.54583	-2.90572	-1.93792	-2.0736	-0.0561068	2.5652	1.51217	-1.93411		2.24962	0.172189	-2.84775	3.13426	-2.06462	2.57394	-0.692209	1.37855	-3.0588	1.68959		0.370859	0.585897	0.982204	-1.03369	3.13352	2.14289	-0.0893686	0.586831	-3.12218	-1.91644
							3.05997	0.193608	0.875011	-2.57694	2.59046	2.07166	-0.27287		-2.84658	2.70429	1.5295	0.148947	0.893417	-1.85094	-1.31856	-1.35011		3.05997	-1.13988	-0.0775016	2.59046	-2.06501	2.09242	-1.49035	1.22631	-3.07015	1.0157		-0.774728	-2.1418	3.00666	-1.69052	-3.07343	2.5126	-2.80324	-0.341061	-2.9523	-1.24546
							-1.09349	-0.400918	-1.6046	3.08284	2.04438	1.03652	0.472407		3.07902	1.81214	2.68085	0.681732	1.96428	-0.849887	-0.694067	-0.125211		-1.09349	1.04833	-2.87102	2.04438	-2.92795	2.78494	2.06374	0.200122	-1.32602	0.0374612		1.33123	-2.73754	0.0881697	-2.06547	3.0854	2.7682	-2.06453	-1.14256	0.0196751	-0.372479
Stv (-His)							-1.39729	0.18653	0.864053	-2.12955	1.14248	0.300423	-1.34642		2.49338	0.719515	-3.02194	1.89448	2.9756	-0.0409873	0.323862	0.547617		-1.39729	1.99915	-2.3402	1.14248	2.61128	-1.61164	0.819252	-0.840498	1.68164	-0.734414		0.932384	2.8682	0.862711	-3.00522	-2.92199	-0.289006	2.90825	-2.01048	-0.563657	-0.800429
degrees (pi, max)			turn number in each range	fraction	degrees		1.61448	1.11313	0.190157	-2.75052	0.486758	-1.15451	1.89053		-2.97851	-0.170728	-1.88903	-2.02165	-2.46957	0.92743	1.66382	0.421113		1.61448	2.59157	-2.30324	0.486758	1.59619	-2.55563	3.02441	-0.286887	-1.77037	-1.39888		0.0919065	-3.06608	2.60807	-3.07337	2.46817	-2.4031	2.01712	-2.82116	-0.971058	2.02107
-3.14159	<=-3.14159265358979	0	0	0			-2.59684	1.71604	2.86253	1.99549	-2.1104	0.984837	-0.926037		-2.08165	2.5017	-2.42735	2.01799	1.04712	1.50549	1.06509	2.23441		-2.59684	-1.93796	0.410666	-2.1104	0.872402	2.33044	-1.22658	-1.03589	-1.20671	2.26283		-2.89968	2.72531	-2.36481	-0.632358	-2.11119	2.77552	1.05007	2.02389	-1.56865	2.69667
-2.35619	<=-2.35619449019234	447	447	0.143638	-180 to -135		-2.82005	2.94365	3.13148	0.978896	-2.86905	-0.26287	-0.0993599		-1.40763	-2.6354	-3.08804	-2.36455	0.31487	1.21441	2.5005	-2.14998		-2.82005	-1.02483	1.10711	-2.86905	-1.36288	-2.35926	-0.943003	2.85303	1.68323	3.06452		2.82619	2.17239	-1.70201	0.509914	1.13956	-1.1809	-0.0385609	1.29721	-2.72623	-1.19401
-1.5708	<=-1.5707963267949	779	332	0.106684	-135 to -90		2.60426	-2.72322	-2.7134	0.915718	3.01333	-1.10373	2.58678		0.163677	-2.10102	-2.69352	2.62131	0.967864	0.33366	2.3761	0.746652		2.60426	-0.21238	0.296804	3.01333	0.782828	-2.06886	-1.44876	2.95421	-1.80743	2.77508		-1.11555	1.11186	3.11883	-2.50008	-2.16476	1.53052	-1.26045	0.312543	0.0754338	2.73041
-0.785398	<=-0.785398163397448	1096	317	0.101864	-90 to -45		-1.55935	-2.19503	-2.32417	1.83429	-2.05789	-2.29985	0.793079		0.708264	-2.68979	-1.01569	1.3562	1.66853	0.732889	2.09671	1.5867		-1.55935	0.2176	0.967708	-2.05789	0.134313	-1.1152	0.074884	2.12009	1.5377	1.88593		-2.49558	-0.580034	0.210718	-2.23876	0.331037	0.731806	-1.92421	-0.978979	-0.408867	-2.89066
0	<=0	1470	374	0.12018	-45 to 0		-1.81314	-1.08496	0.383596	-1.04689	2.28095	2.66884	2.3493		-2.79978	2.72346	-0.142903	-2.03883	1.27431	0.130334	2.44373	0.797429		-1.81314	-1.69136	1.30894	2.28095	-2.60973	-3.13251	2.06466	-0.154025	-2.41469	1.22587		2.42145	-1.28892	2.64842	-2.74243	2.50177	-2.83616	1.43016	-1.99351	2.63538	-1.89
0.785398	<=0.785398163397448	1866	396	0.127249	0 to 45		-1.22353	2.73699	-0.300896	-0.380201	-2.39043	1.74904	0.0669885		2.3807	-2.76513	1.14482	-3.07458	2.59701	0.899367	-1.23104	-3.12357		-1.22353	2.02918	2.63133	-2.39043	1.39937	-2.40249	2.06024	-1.1966	-1.58049	0.681796		1.59703	0.702297	2.05727	1.03806	-1.51356	2.32778	2.094	-3.13834	1.5689	-0.461168
1.5708	<=1.5707963267949	2222	356	0.114396	45 to 90		0.656908	2.02134	-1.41337	-0.824544	-0.498386	2.56712	-1.02354		1.81978	2.83784	-2.14423	1.75565	-2.76076	2.7619	-1.81707	0.021632		0.656908	2.29331	2.20921	-0.498386	0.711633	1.36521	0.154186	2.68087	-0.789357	-2.01711		2.19717	2.83837	-3.02452	-0.034416	1.85394	-2.74573	2.85433	1.89044	2.25107	0.0925027
2.35619	<=2.35619449019234	2619	397	0.127571	90 to 135		-0.198487	2.83701	-1.36214	1.2758	-0.7614	-2.94447	2.80769		1.63338	1.89737	-1.72373	-0.540719	2.9458	-1.33871	2.95466	-2.35858		-0.198487	2.79323	3.11142	-0.7614	-0.00203758	1.87015	-0.780224	0.977614	-1.53982	-1.21179		-1.05634	2.14088	-2.08561	-0.426065	2.74911	1.17243	-2.69735	0.893527	-0.412131	0.78321
3.14159	<=3.14159265358979	3112	493	0.158419	135 to 180		-1.06898	0.10873	-1.91429	2.2973	-1.06912	-2.71156	-2.70619		0.447781	1.00786	1.50621	2.52877	2.48387	-0.421523	-1.60764	2.68919		-1.06898	-2.83549	-2.87425	-1.06912	-0.533126	2.18371	-1.47969	-0.0295607	-0.76475	-0.863653		-1.88623	0.852597	-0.947313	2.72136	-2.40647	-0.733268	-1.72403	0.12673	1.69381	2.1999
			3112				2.53141	1.12399	-1.37609	2.13785	-1.48711	-1.82783	-2.3033		2.04853	-0.152018	2.43753	-0.0129803	3.07295	0.367059	-0.963567	2.02167		2.53141	-1.27971	-2.04268	-1.48711	-1.53792	1.54138	-1.59863	-0.695381	0.125062	2.33353		3.0567	0.102712	-0.0975229	-0.813801	-2.97612	-1.45473	-0.879673	-0.890746	-0.307052	-2.26038
							2.60092	2.90018	-1.69433	-2.89494	-2.81675	2.72665	-1.45707		1.13254	0.287974	-2.97498	1.61035	-2.65701	1.93494	2.24115	0.942979		2.60092	3.07673	-0.887843	-2.81675	-0.578943	0.901092	-2.50484	-2.49153	-0.569823	3.07924		-2.76632	-1.29948	-2.41961	1.38609	2.13057	3.09027	-0.225789	-1.77857	-1.39788	-2.16418
							-2.93029	2.4326	-0.880148	3.06958	2.64197	0.548515	-0.828213		2.60101	-0.785685	-2.15145	1.64644	2.4131	1.17082	2.90766	0.185255		-2.93029	1.62743	-3.07415	2.64197	2.71759	1.6919	0.830391	3.09038	0.536961	-2.88484		3.01835	-2.34872	-1.50167	0.81581	-1.50318	2.72809	1.40196	-3.12438	-2.44427	-1.62878
							-0.544621	2.8985	-2.85708	-1.97211	-2.61427	1.68217	-1.71368		1.47572	-2.51524	-0.957857	2.09241	1.82242	1.23359	-1.34353	-0.355667		-0.544621	-2.2073	-1.83248	-2.61427	-2.96443	-3.08408	-0.929192	2.36171	-2.83711	-2.92103		-3.07429	-2.98267	-1.06352	0.0189193	-0.904202	1.33603	2.78081	2.48713	-3.10649	-0.0376607
							2.93926	-2.55719	2.68154	-1.37981	-1.52257	-2.60477	1.87659		2.2913	3.07506	0.522239	0.0806188	2.73795	-0.859923	-0.308886	0.410693		2.93926	0.1047	-2.29726	-1.52257	-2.55169	-2.31532	1.30356	2.56883	-1.79288	-2.48544		-3.06859	-2.09315	2.32573	-0.743051	2.91303	1.21788	-2.92275	1.35666	0.21423	-0.992837
							-2.07325	-1.39461	-3.08677	-0.672633	-0.139731	-2.52188	1.06926		0.115957	3.08242	1.32245	1.41621	-1.84092	-0.0213213	0.193187	-1.6336		-2.07325	-0.704262	1.05288	-0.139731	-2.67995	3.06383	0.51319	-1.96001	-0.907275	-1.87976		-2.86107	-2.70552	3.09936	1.65393	2.23578	1.64824	-1.80502	0.508243	2.51946	-1.5471
							0.993592	-0.362176	-3.13687	-1.64061	2.01066	3.06457	0.266067		0.618121	2.47837	2.3843	0.982284	-1.4133	-2.94753	1.05718	-0.255226		0.993592	-1.57128	1.66042	2.01066	-1.62908	0.30322	-0.148203	2.37119	0.0386952	-1.49854		1.38407	-2.96803	-2.16003	-0.141499	2.91618	0.806081	-1.05943	2.90737	-1.54095	-2.58596
							-1.83656	1.39662	-2.67311	0.237216	-2.30876	2.85072	-1.15021		2.31521	1.65496	2.65441	-0.217476	-0.942887	0.224031	1.79782	0.952952		-1.83656	-2.24382	-1.66275	-2.30876	-0.146728	-1.6623	0.613116	0.822713	0.733288	-1.35554		-2.81468	2.80111	0.253742	0.450453	-2.92174	-0.253926	-1.56042	-0.0830388	0.495698	3.00134
							0.571376	2.0079	-3.08565	-1.18798	-1.53032	-1.26186	2.83277		3.11118	2.44176	-3.00214	-1.38935	2.03258	1.77506	-1.64825	0.336541		0.571376	-3.10859	-0.851707	-1.53032	2.47905	-2.56006	-2.72533	0.280322	2.39821	2.7596		-0.810533	-0.493738	-2.68172	2.50247	-2.04215	-1.19592	-2.05536	-0.920352	-0.261846	1.82887
							-0.554943	-1.88828	-2.98523	-2.00512	-0.701807	-2.12599	1.60555		-2.44437	1.59972	-2.54917	-2.499	1.23378	0.0608244	2.56427	-0.440955		-0.554943	2.72999	2.88822	-0.701807	-3.04975	-2.64449	2.94485	-2.7976	-2.98835	-2.98679		0.188393	0.4687	1.71012	0.388167	-2.52878	-1.84531	-2.26232	-1.62701	2.93938	0.526534
							2.42367	-2.81926	-1.75256	-1.46702	-0.170937	-1.58717	0.373719		1.60737	-0.609949	-1.74638	2.99686	0.615748	1.30949	3.07628	-1.26722		2.42367	1.9107	-2.95004	-0.170937	-2.68829	1.74437	2.05658	3.11463	2.61902	-0.00845917		1.57386	1.19425	-2.19008	-2.24582	2.764	-2.60107	2.01626	3.01134	2.21141	-1.1507
							-2.06348	2.40582	-2.12208	0.557313	-3.01095	-0.116648	-0.332805		0.595854	-1.78025	-2.47914	1.88897	1.33913	1.89685	2.56583	-0.745673		-2.06348	1.26172	-1.88632	-3.01095	-2.02084	2.05509	1.18874	-3.02559	-0.212688	0.984898		-1.33141	1.66811	2.19741	-0.680297	1.95489	-1.94903	1.21401	2.58056	2.90161	-1.77956
							1.60988	3.12421	-1.25145	1.40272	2.26944	-0.977964	0.819451		0.114049	-2.0674	1.03741	1.08521	0.163593	2.78332	-1.46505	2.94225		1.60988	-1.69217	0.800463	2.26944	1.68998		1.6404	2.27998	1.14993	-1.10897		-0.323896	2.26214	-1.49119	-2.50735	-3.03118	-1.43955	-2.70641	-2.85917	-3.11456	0.279306
							-2.56064	-2.61786	-0.429455	0.339814	2.4267	-1.5426	1.5168		-1.59961	2.79072	1.58	-0.441486	1.85266	-2.73636	0.500152	-2.62483		-2.56064	-2.24552	1.84206	2.4267	1.28669		1.38442	1.43847	0.425078	0.364277		-2.43343	-0.33452	-0.645069	-2.91346	3.09364	-2.39279	-2.15168	-2.23593	2.83758	-1.6288
Fed (+His)							2.22516	2.20097	2.31664	-0.287706	1.65184	-1.77768	0.935302		-0.642122	1.42567	2.03024	-2.20655	0.376155	-2.00127	2.02179	-3.12581		2.22516	-1.18505	2.9852	1.65184	2.71995		1.46599	0.600848	-0.106432	1.17561		-1.61494	-1.05259	1.40306	1.17236	2.48382	3.11993	-2.64718	-0.451538	-3.12247	2.37745
degrees (pi, max)			turn number in each range	fraction	degrees		1.49583	2.61892	-1.2652	0.519342	2.57434	-1.08674	0.976814		0.213487	0.920271	2.14024	2.34678	0.201237	2.76129	2.41654	2.88226		1.49583	-1.2414	-2.9332	2.57434	-0.52948		2.20563	-0.0315054	-2.37385	2.17924		0.63087	-2.21355	2.0608	-1.03724	1.70168	2.30361	-1.16735	0.709241	-3.09686	1.85611
-3.14159	<=-3.14159265358979	0	0	0			2.71139	-2.87292	-0.936782	2.0646	3.04988	-2.09851	-1.65839		-0.0284724	0.240113	-1.55068	0.398074	-0.0724712	-2.86647	3.0855	-3.08091		2.71139	-2.35339	1.0034	3.04988	-1.22026		2.81426	1.83951	-1.64204	-0.843275		2.07142	-1.53533	2.77924	-2.30505	0.936886	0.301151	-1.23212	1.74277	2.83647	1.0452
-2.35619	<=-2.35619449019234	529	529	0.175923	-180 to -135		-2.58204	1.6125	-2.95463	2.63277	-3.00125	-3.06857	0.683658		0.684401	-0.524796	2.75714	-0.185415	-0.578791	-1.9586	-2.46715	2.55715		-2.58204	0.147263	-2.24186	-3.00125	-1.84039		1.96418	2.51722	-0.561946	-0.252552		-2.63639	-2.10983	-2.50235	-2.90286	1.84273	-0.076593	2.47286	2.43702	-1.61111	0.176777
-1.5708	<=-1.5707963267949	884	355	0.118058	-135 to -90		-1.78818	-2.41462	-1.6029	1.43905	1.91171	2.50377	3.12381		-0.397802	-1.31122	-2.90276	-0.335411	-1.54205	1.61094	2.78931	-3.08203		-1.78818	2.84832	1.92911	1.91171	-1.22371		2.77767	-3.04949	0.18299	0.611765		-2.49515	-1.43293	-1.73836	0.0191681	-0.0797224	-2.43073	-3.04463	-2.07815	1.08359	-0.83318
-0.785398	<=-0.785398163397448	1201	317	0.105421	-90 to -45		-2.5523	0.855664	1.16889	0.591266	-2.49928	1.66657	-2.8415		0.305785	-2.11986	-2.20849	2.59834	-1.69793	2.27776	0.422969	2.69045		-2.5523	1.65966	1.17367	-2.49928	-2.52628		3.1185	-2.52336	1.61673	-3.0287		0.660736	2.7296	-1.01183	1.37474	1.49072	-3.06647	3.06547	-1.19324	1.66073	-1.44384
0	<=0	1487	286	0.0951114	-45 to 0		2.45166	-1.11141	1.99234	-0.174011	0.861634	2.16948	3.10971		0.285798	-2.7335	2.9257	1.78188	-2.52107	2.85077	2.29478	-1.94781		2.45166	-0.0652263	0.443454	0.861634	-0.31286		2.19042	-1.36527	2.45321	2.51025		-0.677002	2.07474	-2.59378	2.44406	-2.94705	2.45633	1.55941	-0.309585	0.14271	0.892979
0.785398	<=0.785398163397448	1750	263	0.0874626	0 to 45		1.33058	-2.47999	-2.5193	-2.04982	2.8516	3.10797	-2.78533		-0.449079	2.61148	-3.08366	1.67892	-3.00498	-2.93572	-0.335633	-1.36195		1.33058	-0.980363	1.93385	2.8516	-2.77059		1.00343	0.082727	0.0917793	1.60997		-0.998893	-0.756214	-1.74254	-3.09195	2.90455	1.92943	0.703564	0.347327	-0.407228	-1.07511
1.5708	<=1.5707963267949	2067	317	0.105421	45 to 90		1.52771	3.03815	2.59069	-2.6762	-2.66599	3.11867	-1.84915		-1.99121	0.711909	2.69567	1.20367	2.58508	-2.369	-1.39671	2.65827		1.52771	-1.8333	3.04364	-2.66599	0.539729		2.4801	0.529489	1.20295	0.796504		0.686968	2.57469	-0.2198	2.36476	1.95566	2.34097	-1.59974	1.36514	-2.59191	3.02713
2.35619	<=2.35619449019234	2483	416	0.138344	90 to 135		2.80797	2.86998	0.42636	-2.14342	2.78854	2.70167	-2.5351		-3.0056	-0.0260981	2.59684	1.06025	-3.05152	2.84859	0.380022	-1.88905		2.80797	0.0503345	-2.51556	2.78854	1.04116		-0.817507	-2.90128	-1.57459	-0.362327		2.2093	3.02761	1.05419	1.42425	1.21344	1.92783	2.07696	0.948734	2.79076	0.10984
3.14159	<=3.14159265358979	3007	524	0.17426	135 to 180		-1.48185	1.47228	-0.0283082	-1.51175	-2.9026	1.99025	-1.94323		-2.62726	-0.894016	-2.45673	1.36057	3.07403	-2.81863	-0.251777	3.10202		-1.48185	-1.20103	2.85258	-2.9026	0.956786		-2.07575	-0.480418	0.345995	0.382797		-1.99604	-2.65649	2.9833	2.84293	1.7579	2.91934	1.03657	1.7343	2.25268	2.42463
			3007				-2.78117	1.85555	-2.78143	-2.20765	1.48958	-2.43645	-0.999019		2.01642	-1.75578	-3.01097	-3.08281	-2.96972	-2.16141	0.455385	3.0811		-2.78117	-1.78849	-2.05359	1.48958	-2.8906		2.7375	1.89769	0.208037	-0.0791097		0.490746	1.71116	0.148642	-1.3114	0.875605	-2.77071	-0.828521	2.69101	-0.871602	1.68573
							-0.428997	2.04071	2.73413	-1.56089	2.1265	-3.12684	-0.266192		0.796971	-2.77292	2.7806	3.09882	-2.79652	-1.24193	-0.311705	2.00356		-0.428997	-2.64888	-1.14797	2.1265	-1.9259		-0.710702	-2.9293	-2.61648	-2.8865		1.66469	-1.09794	0.432303	2.37989	2.87046	3.04605	-1.14592	-2.72047	1.81061	0.680419
							-2.19838	2.85173	2.88693	-1.03784	-3.04062	2.87447	2.77662		-1.45364	2.70572	2.00048	2.31349	-2.1756	0.296791	-0.055588	-0.709472		-2.19838	1.65623	-2.46601	-3.04062	-1.60056		-0.146542	-2.26484	0.8594	1.78274		2.44577	3.11489	1.87155	2.15731	-2.59514	1.7579	0.288288	-2.05555	1.12741	-2.69321
							-0.231757	-3.10671	-2.80586	-1.65738	2.61094	-0.915125	-2.88482		-0.535972	1.9083	-2.89106	2.96924	-1.6407	0.621319	-0.724624	-1.51934		-0.231757	-1.93689	2.39601	2.61094	-0.541739		3.09158	-1.40029	-0.205965	1.13032		-2.74038	2.76606	-1.49769	-2.57673	-2.53496	-1.04306	1.42964	-1.20869	1.67147	2.58394
							1.52086	3.02635	2.99221	-1.63172	1.47614	-1.68441	-0.580568		0.55845	1.14653	1.41954	-2.09329	-2.85369	1.12679	3.04143	-0.351549		1.52086	-2.82974	1.27856	1.47614	0.155699		2.43933	3.0063	-1.46643	2.0595		-2.33994	-2.84659	-0.592086	2.24756	-3.1087	-2.67406	2.78239	0.186745	-3.13642	0.538596
							1.60077	2.77979	-3.07523	-2.74004	2.50053	-2.60596	-1.39346		2.90194	0.325514	1.8281	-1.6876	3.14131	2.08549	-3.12295	-1.07878		1.60077	-1.34517	1.87803	2.50053	1.50035		-1.07567	2.55578	-1.9683	-1.23883		0.498611	-1.83605	-1.86412	2.82702	2.87421	0.584839	-0.651447	1.06816	-2.95138	-0.0468999
							2.13719	2.65889	2.60951	3.03433	-1.55081	3.12314	-1.903		1.70457	-0.428758	0.913571	2.36573	3.03876	2.85933	-3.07843	-2.44086		2.13719	1.84984	-2.30434	-1.55081	2.49868		-2.0685	-3.03522	3.10265	-2.40013		-1.22395	-1.06001	-1.12385	1.59914	1.99654	-1.85268	0.252965	1.59256	2.89564	-1.00204
							-3.04409	-0.002408	-2.84153	-2.44988	-0.810451	-2.81462	-2.6693		0.792063	-0.713297	1.76749	-2.68649	-3.07832	1.32813	3.12477	0.189871		-3.04409	1.10419	1.63597	-0.810451	3.13065		3.08497	0.0393341	-2.59256	1.60843		-1.95451	1.5469	2.28193	0.927781	2.33625	2.24665	0.95368	2.58868	2.73773	-1.28497
							-1.94391	-2.24013	2.80838	-1.63013	-0.230815	2.98288	-2.01828		0.0452708	0.00466831	2.66587	1.66091	2.57901	2.21476	2.78	-0.608881		-1.94391	0.227903	0.0375875	-0.230815	-2.83674		-1.28558	-1.02865	-1.17179	1.16776		-2.90671	0.0113027	2.66492	1.46214	2.03252	-0.175217	-2.97846	1.6668	1.20002	-0.715674
							-2.45881	2.96697	-3.07201	-0.546484	1.35779	-3.04143	0.260166		0.380886	0.262848	-3.0487	0.857115	-2.67587	1.87274	-0.316012	-1.69205		-2.45881	-2.80661	0.496574	1.35779	-2.21289		2.66675	-2.75014	2.57468	0.218282		-0.916463	-2.13656	-2.00215	-2.41781	1.08275	0.981362	-2.62763	-2.47941	0.019314	-1.93618
							-1.1189	-2.52408	-2.38711	0.793156	-2.78129	2.43789	-2.77172		-0.196163	-0.664613	-1.21278	-0.398343	-2.10918	2.66576	-1.08757	2.47153		-1.1189	-1.96036	2.43779	-2.78129	-1.2278		2.5228	2.87894	-2.74559	-2.55902		2.38212	0.550427	2.83415	0.31248	-0.0831432	-3.13126	-3.09764	-1.77371	-1.99454	0.639106
							-0.676752	-2.29766	3.10612	1.76472	1.31764	1.44562	-1.91839		1.73952	-1.46645	-1.65727	2.46944	-1.61032	-2.75693	2.86574	1.619		-0.676752	-2.07206	0.307973	1.31764	-1.5618		1.16945	-1.49212	2.28083	-0.392135		-2.13068	-2.47596	-2.14156	-2.32945	-2.74898	-2.21049	-2.47683	-1.06574	0.442978	3.01975
							2.7529	-2.74259	-2.72797	-2.98562	0.851085	0.615714	-0.812474		-0.372223	0.365831	2.83622	2.79297	-1.02718	-1.55405	-2.13573	0.871917		2.7529	2.25619	-0.712583	0.851085	-2.34361		0.511286	-2.55074	-0.195643	1.21012		-3.03138	-1.68724	-1.794	-2.35563	2.62317	-1.23081	0.337766	-0.0995251	-0.256768	-1.15449
Stv (+His)							2.0286	-1.81075	2.99885	2.82938	0.5661	-0.114218	-1.43062		-2.80487	-2.1998	1.20023	1.8442	-0.119701	-0.0364492	-1.39284	0.149297		2.0286	0.0994492	-1.37586	0.5661	2.62808		-1.8763	-3.02945	0.464561	-1.77456		-2.43861	-0.21142	2.37984	-1.50689	1.78878	0.0206783	2.75753	0.72049	-3.10671	-2.16882
degrees (pi, max)			turn number in each range	fraction	degrees		2.57915	2.21826	2.53012	-2.02012	1.14239	-0.710484	-1.79197		-2.37597	2.88229	-2.87019	0.72256	0.601953	0.866564	-0.481883	-0.890332		2.57915	-2.04735	-3.08997	1.14239	-2.75065		-2.65464	0.119589	-1.03134	2.49849		-0.175576	1.63144	-2.4972	-0.790205	0.704495	2.8811	2.86525	1.72604	2.83242	-1.57937
-3.14159	<=-3.14159265358979	0	0	0			-2.0891	2.86577	2.91075	-0.764423	1.7888	-1.68289	-0.384996		-2.16061	2.15009	-1.48886	-0.111931	2.0466	1.75459	0.0787114	-1.74861		-2.0891	1.53629	2.49853	1.7888	-2.20841		-1.87228	1.99672	2.6184	2.85612		-1.47299	-1.38425	-2.89761	2.71421	-0.391248	0.11418	1.96194	-1.57982	-2.51317	1.2206
-2.35619	<=-2.35619449019234	349	349	0.16278	-180 to -135		1.92779	-2.55001	1.92252	1.14262	2.70067	-2.64561	1.1989		-0.665735	1.19539	2.15727	-1.31706	2.78439	2.0404	1.09037	-2.54593		1.92779	3.11174	2.05222	2.70067	2.86473		-2.89147	1.43692	2.21942	-0.884456		2.98714	2.72437	-2.26192	-0.989865	1.40785	0.79996	-2.72052	1.65537	-2.17631	2.23359
-1.5708	<=-1.5707963267949	620	271	0.126399	-135 to -90		2.41341	-1.86949	2.68018	2.05872	2.00391	2.9953	1.88605		1.75865	-0.765955	0.699315	-0.850283	-1.97495	1.90221	0.0677728	-1.74177		2.41341	1.59514	-2.29209	2.00391	-2.54971		2.74422	2.23432	-2.79439	-1.69699		-2.87751	-3.12532	2.19326	-1.68319	-2.78826	-0.94422	0.281721	2.16258	1.81653	-2.75677
-0.785398	<=-0.785398163397448	873	253	0.118004	-90 to -45		-0.723884	-2.84268	1.40995	-2.51852	2.53256	2.33951	3.09831		2.98854	0.60193	1.83213	2.55681	-0.859308	2.62759	-0.243645	-2.97394		-0.723884	-0.389777	-2.74726	2.53256	-1.94081		-2.66429	1.33376	-0.452178	-1.18659		-0.908631	-2.34888	-2.59339	1.4845	2.86798	2.99208	-0.599627	2.80616	0.548229	-2.34317
0	<=0	1060	187	0.0872201	-45 to 0		0.00512578	-0.0247801	2.54653	-2.26538	1.76349	0.790412	1.26212		-2.19384	-1.89162	1.24114	1.9024	0.233372	-3.07273	0.593441	2.65295		0.00512578	-2.21057	-0.0230365	1.76349	0.163799		0.198855	0.61703	0.869626	-2.05989		0.422762	-1.2216	-2.18731	1.32606	-3.08143	-2.64056	0.716616	-3.08843	-2.52175	-2.63357
0.785398	<=0.785398163397448	1287	227	0.105877	0 to 45		1.81855	-1.76602	1.88041	-3.04513	-1.44806	-0.271092	1.55611		-2.98623	-2.71932	1.91761	-0.0151149	1.3965	-1.87821	0.522571	0.388931		1.81855	3.06384	2.77159	-1.44806	-1.99981		3.07932	1.70437	-0.235621	-2.71693		1.5272	-0.353707	-2.68788	0.428338	2.82617	-0.188264	2.03881	-2.60661	2.49789	0.49601
1.5708	<=1.5707963267949	1494	207	0.0965485	45 to 90		0.622879	-2.68518	2.22923	-0.323071	-1.99758	-1.68404	1.94324		-0.968491	2.85669	2.64696	0.407845	-2.75109	-1.74472	2.15282	-0.853662		0.622879	-1.91687	-2.86066	-1.99758	3.09799		1.50331	1.20157	0.888293	2.17513		2.46978	0.716444	-2.0668	-1.88192	2.29242	-2.73318	2.36613	2.86092	-3.13999	1.51617
2.35619	<=2.35619449019234	1778	284	0.132463	90 to 135		1.11651	2.93892	1.29998	-3.05208	0.249258	2.47008	1.53321		0.532455	2.09897	-2.77312	-2.41259	-0.619987	2.77647	2.82857	-1.75461		1.11651	2.60478	2.44778	0.249258	1.87442		0.619308	-2.02598	-0.111976	1.43643		1.81108	3.12128	-1.13666	-2.40616	1.87805	-0.414631	3.00866	2.05017	3.06705	-1.78
3.14159	<=3.14159265358979	2144	366	0.170709	135 to 180		2.30924	1.66342	2.01776	2.6929	-0.0962819	0.449577	2.09736		1.57689	1.13558	3.03191	3.1205	0.54987	2.21784	-2.89778	-2.76536		2.30924	0.871412	1.86279	-0.0962819	1.37195		2.64844	-2.78521	-1.09982	0.81522		0.255503	-2.9132	0.235391	-1.44873	2.93466	-1.12473	-0.574273	0.397723	3.08556	-0.711225
			2144				-0.192836	2.67792	1.17614	-3.00079	-1.09523	-0.552952	-0.344085		-0.908291	0.312441	-2.99203	2.64986	-0.231889	1.44323	0.601478	2.70769		-0.192836	-0.439783	2.26713	-1.09523	0.459063		-1.16213	2.66926	-2.62093	-2.82701		-1.86583	-2.0453	1.55018	-3.06281	-2.28814	-1.71541	-3.12353	-0.837829	-2.12873	-1.25772
							-0.13847	2.26814	2.36958	2.81879	-0.172947	-1.32228	-3.00292		1.52707	-0.514023	2.74652	-0.0594844	0.0584405	2.84415	-2.51631	2.21849		-0.13847	-2.18393	1.7105	-0.172947	-0.312747		-2.96155	1.83	-2.01717	2.38942		1.07932	-1.62165	2.48302	0.222459	0.817821	1.73204	-0.910421	-1.79458	-0.971374	1.66736
							0.535431	1.15618	-2.88496	-2.98545	-2.83473	-2.40468	-1.43236		-1.06105	1.98744	-2.96973	-0.731085	1.75727	1.95011	-1.90208	1.25314		0.535431	2.59486	2.54564	-2.83473	-1.843		2.73652	0.715659	-2.88213	-1.34939		0.947881	-1.01367	-1.55837	1.11603	2.05944	2.42251	-1.73435	-2.46596	-0.674507	-1.6678
							-1.72294	0.641354	-2.23372	2.69638	2.10851	-2.71241	-1.65542		2.46154	0.619669	2.86092	2.94644	-2.08306	2.56204	-2.77398	2.16193		-1.72294	-2.9862	-2.73996	2.10851	-2.73193		-2.95463	-1.91756	3.01307	-2.30709		-1.11381	2.05861	-0.874312	1.6827	-0.152519	-2.49617	0.684163	2.33223	-2.5859	-0.885786
							0.89848	1.0094	-0.694624	-1.41466	2.28304	2.79205	-3.03077		-3.02963	-0.137557	2.5529	-2.40871	-2.89387	-2.46235	-1.39111	1.34495		0.89848	0.844356	0.349936	2.28304	2.74386		0.735773	-2.78908	-2.88063	-0.416486		0.504044	-1.45996	-0.159931	0.926003	2.75486	-0.768714	-0.185255	1.3071		-1.37412
							-3.12175	-0.804991	-3.13176	-1.91885	1.37506	2.15593	-2.2898		2.74717	2.83143	-0.888621	-1.68749	2.84871	-1.24589	0.910518	0.953419		-3.12175	-2.60458	-2.5499	1.37506	1.91229		3.05952	0.502547	3.10996	-1.05391		0.669408	0.927824	1.57398	1.45398	-2.02332	0.826677	-1.00818	0.487268		3.08787
							-3.08278	2.5894	2.61723	0.959772	0.25456	-3.12287	-0.0332784		-2.91719	2.15801	0.553668	-0.800421	1.99762	1.12255	0.238754	1.01929		-3.08278	-2.04426	3.05167	0.25456	1.22665		0.619543	-2.472	2.21724	-1.76564		-0.553716	-1.78725	2.19744	2.18799	-1.26895	1.99205	2.63512	-0.212869		-3.10455
							2.17291	-2.27658	1.7629	2.65853	-2.69664	1.8547	1.3025		-2.39781	1.6132	1.27692	-1.40224	0.523129	-0.171543	2.41751	0.0800484		2.17291	0.059205	-2.78108	-2.69664	0.786914		1.31	3.04892	2.93868	2.2797		-1.65161	0.296679	2.72711	1.56106	-0.228658	2.80163	-2.70142	2.1317		-2.75809
							1.1258	2.81199	1.78142	2.01168	3.12826	-1.76904	0.532418		-2.49026	0.618962	0.745552	-1.87416	-0.139966	1.29608	-2.21032	-1.16284		1.1258	2.54186	-2.04987	3.12826	1.068		0.111966	-2.09607	-3.0199	2.81252		2.02783	2.41919	1.37313	0.618456	-1.97354	-0.992155	-2.06735	-1.80473		2.98953
							-0.205808	-3.11908	1.12333	-2.08696	2.69781	-1.02149	1.58598		-1.26971	-0.290507	-0.0535688	-1.36181	-0.847907	1.98184	-0.832404	-1.85448		-0.205808	-2.89146	0.127609	2.69781	-2.72088		-0.318452	-1.11789	2.43251	-2.58391		0.728828	-0.344086	2.83285	-1.4511	0.632818	1.07416	3.07648	-1.05133		2.74098
							0.296642	-2.59016	1.97524	3.04694	-2.7954	-1.4051	-1.39794		-1.89951	-1.08175	-2.17804	1.3005	-1.48564	0.473826	0.604899	-2.85739		0.296642	2.01939	1.67716	-2.7954	3.05633		2.73919	-3.13747	2.34766	-0.703426		-1.09771	-1.44363	2.6752	-0.520664	1.54025	1.87786	-2.63411	-2.29871		-2.93324
							3.09382	-2.5417	1.16939	2.50782	0.202907	-1.05652	-2.35226		-2.87853	-0.180555	-2.686	1.73417	-0.72274	1.2477	1.33266	2.89988		3.09382	2.93211	1.0692	0.202907	1.63201		-3.10128	-3.06499	3.12519	0.530307		1.5315	-1.68765	-2.79278	2.17555	-2.9683	0.599111	-1.60682	-1.48139		-2.58746
							-1.66079	1.24719	-2.31776	-2.89071	-3.13408	-1.75062	0.575901		3.01742	1.77288	2.8315	-2.35012	-1.30127	1.10087	-3.10018	0.307433		-1.66079	2.20078	1.83061	-3.13408	-0.53357		3.13866	-2.59061	-2.59844	2.41653		2.02627	-1.36124	2.84189	-2.81648	-1.98843	-0.816769	-0.840456	-0.32988		-1.99133
							0.218226	2.65191	2.41721	2.68171	-3.13852	-0.906172	1.1081		-1.1473	-2.87731	-2.75308	-2.14943	-2.55208	2.59022	-2.57083	-0.275476		0.218226	1.04498	-3.1141	-3.13852	-1.81169		3.12016	-1.66326	2.65327	-2.56938		2.24807	-2.37401	-1.56018	2.8636	-0.938939	-2.95655	2.27817	-2.39869		0.942712
							2.27086	1.93457	-0.148582	2.47958	-1.87351	0.607579			2.81024	2.08546	1.37079	2.34373	2.79426	3.10637	-1.63558	-0.0817526		2.27086	0.146462	-1.85346	-1.87351	2.64535		-2.97181	-2.47183	-2.97441	-1.41225		-0.193462	0.000548385	2.10926	1.85765	0.0745013	-1.57911	-2.98364	-0.40353		-1.53673
							-1.02867	0.704918	-3.1076	2.82653	2.14494	1.60399			-3.04741	1.38001	-0.791015	1.63687	1.71028	-0.0723129	-0.497412	-0.675858		-1.02867	2.74671	-2.54641	2.14494	1.75575		-3.13163	-3.09348	2.52133	-0.89229		-3.07298	0.76479	-1.92511	1.46549	-0.217454	0.353396	-0.0204198	2.06347		-2.39301
							-3.12867	2.93433	2.49692	2.09698	-0.965324	-2.78058			-0.570396	-0.100525	-1.29848	0.17092	0.774146	-1.88151	-0.427291	2.3783		-3.12867	-0.463199	-1.09229	-0.965324	1.1754		-3.11134	-3.05205	-2.38628	2.41583		2.06772	1.04576	-2.34661	0.967799	0.481617	2.47883	-1.41929	-1.07915		-3.07195
							-3.06062	1.84109	1.95846	1.43893	2.85084	-1.81661			0.23917	-1.94885	-2.54457	-1.59042	0.0880132	-0.305656	2.80775	-2.78291		-3.06062	-2.51216	0.892631	2.85084	-0.659725		2.93669	2.403	-2.83665	1.94717		-2.58321	-1.48331	2.78514	-2.77049	2.06874	-3.11945	-2.48834	0.118031		2.63994
							-1.30599	2.45585	0.551122	1.93733	-0.796581	-1.09832			3.00621	2.5786	2.61258	-2.42484	-1.29202	-1.69349	-2.71596	-1.55563		-1.30599	1.7336	2.33052	-0.796581	-1.54939		0.333219	-3.07518	1.41933	2.57852		-1.42239	-2.54965	-2.18181	2.38739	-2.36035	-2.84263	-1.74129	0.941612		-1.14446
							-2.66983	1.90752	-1.79168	-2.97092	0.333879	-0.510967			-2.26931	1.10554	1.83419	1.53519	-1.87784	-0.532467	-2.03119	-2.07394		-2.66983	-1.48836	-2.55325	0.333879	2.34595		-0.260271	-2.66125	-0.364883	2.94106		0.649554	2.95673	0.333184	1.89374	-1.57888	2.70734	-1.29163	1.65864		0.216039
							-2.53756	-1.55227	-0.587349	2.77032	1.3708	0.667227			-1.5419	-0.208236	0.943378	0.353404	2.74359	3.03336	-1.45298	-1.39593		-2.53756	-2.23468	2.40189	1.3708	1.86803		-1.87631	-2.1878	0.538937	-0.891897		1.97961	2.29363	-0.889725	-1.87156	-0.667067	-2.92902	-2.80978	-3.13412		-1.50068
							2.84451	-1.60891	2.33468	2.39544	-1.38881	2.85341			-0.66842	2.80869	-0.0717505	1.95413	-1.91689	2.13276	-1.90589	-0.566265		2.84451	-2.49821	2.96538	-1.38881	1.12746		-3.1332	2.0261	-1.05423	2.60899		2.57236	2.96913	0.752376	-2.75162	-0.080337	1.79307	-2.93608	-2.45449		-0.884584
							-2.64105	0.964777	0.133394	3.07336	-2.63988	-2.85444			1.46961	2.08585	-0.968925	1.03407	-2.54034	1.32422	-1.34838	0.673466		-2.64105	1.37429	0.0479994	-2.63988	0.280246		1.03628	2.7692	2.10327	-0.653659		2.5363	2.08147	-2.93544	2.75076	-1.60847	1.01464	-1.93168	2.44367		-1.04179
							2.8795	1.92279	-1.00538	3.11012	3.02656	-2.01785			-2.7696	2.77243	-1.61573	0.284429	-3.12124	1.99076	2.19931	-1.945		2.8795	2.80581	-2.89471	3.02656	-0.447742		1.73449	-2.07382	-2.26707	-0.0645799		-1.42928	3.12894	-1.57697	-2.40293	2.48215	-2.10174	-1.39901	-2.72357		-0.116248
							1.25786	2.39766	0.456854	2.7917	3.12957	-1.31136			1.65675	-1.92419	2.8864	-0.205339	-2.83142	-1.4509	2.94544	-0.184435		1.25786	-2.81264	-1.13639	3.12957	2.81759		2.68731	2.24778	-1.03945	1.27654		-2.08025	1.81302	-3.13543	2.41698	3.12616	-0.747004	-1.98676	-1.46434		2.03112
							1.95424	1.78557	2.29408	2.2673	2.47976	-0.901204			2.78638	-1.35565	2.42292	-0.736083	2.18946	-1.85409	-2.76709	0.16321		1.95424	2.53159	-2.226	2.47976	3.0739		-2.90827	-3.0348	-1.18967	2.68254		1.8301	-3.04182	-2.78663	-1.83449	-3.0049	-1.85318	-1.34022	-0.69141		1.50153
							1.35361	-2.7635	1.41892	2.94769	2.114	-1.98742			-2.38274	2.84583	2.75261	-1.70809	1.54371	-0.276304	0.261416	-0.236092		1.35361	-1.39857	-2.39787	2.114	-2.77414		1.29483	3.08458	-0.373071	-2.99384		0.430113	-2.43492	-0.895702	-2.98529	0.44597	0.922358	1.49196	0.369338		2.90912
							-2.27888	0.126957	-0.375224	-2.97148	2.80403	0.207763			2.81629	-2.78568	1.48698	-0.875762	-1.80645	0.908632	1.17276	0.274708		-2.27888	-1.86956	-3.09307	2.80403	1.16482		0.84381	3.00915	0.90226	2.64181		0.721392	-1.74963	-0.119273	-2.73901	2.19992	2.60377	3.08871	0.973915		-0.274752
							-1.76278	1.52717	-0.772096	2.10323	-2.86152	-0.0682031			1.83161	-2.0391	0.275735	-0.417045	-2.49511	-2.62422	1.9824	1.65298		-1.76278	2.69687	2.4126	-2.86152	2.0909		0.980995	-0.73045	-1.2968	1.56047		0.440804	2.83169	-2.94703	-0.0681213	1.75877	0.487855	2.77069	-2.22743		0.351525
							0.117075	0.723027	-1.38455	1.44823	-0.0196109	2.34543			3.08318	-1.32013	1.51825	-0.946935	1.10584	-1.59292	2.81066	2.02916		0.117075	2.71434	0.820821	-0.0196109	2.74241		2.22664	-0.419473	2.66907	2.09488		1.52537	1.88869	-2.39372	1.70787	2.4147	0.0748458	1.90857	-1.84557
							-1.20668	-2.64977	1.96172	1.94066	-0.910255	1.35453			1.80526	-2.06637	-0.722439	-1.04621	-0.0377297	-0.927944	-2.95174	2.75264		-1.20668	-0.743141	0.450659	-0.910255	-1.36668		1.49725	2.7497	0.121923	-0.533441		0.987909	0.532487	-1.85538	2.93535	-2.36999	2.23238	3.01365	-0.772745
							-2.73422	1.46906	1.26645	0.935156	2.30535	-2.7743			3.09815	-2.85389	-0.6254	-1.96133	-1.05574	3.01052	-1.20588	0.930838		-2.73422	2.14358	2.26728	2.30535	-0.96218		3.12128	2.05956	0.189961	1.77123		2.94818	0.805428	-2.36987	-2.8397	-1.73439	-1.82809	-2.66021	0.331106
							3.05339	-2.95058	-0.405407	0.83846	1.47301	2.75832			-2.13875	3.07475	-1.56288	-1.38307	-1.77537	0.69029	-0.418868	0.386783		3.05339	-0.551674	2.8433	1.47301	-2.57776		2.48926	2.49014	-2.44019	0.932175		2.31526	1.96457	2.88778	3.1307	2.06148	-2.44411	2.86471	2.53331
							2.65891	3.12429	1.99303	-2.51288	0.562075	2.42206			1.42057	-2.85745	-2.33033	-0.491654	-2.76577	1.63469	0.29682	-0.866583		2.65891	-1.95331	1.85791	0.562075	2.71386		1.96693	1.76728	-3.07291	2.80455		2.27563	2.56269	2.24957	-2.74503	2.62306	-2.02766	-2.79283	-2.79871
							-2.70033	-2.60576	0.69083	-1.00858	2.41816	3.00959			-2.97888	-2.32634	-3.00476	0.330234	3.0288	2.49819	1.04938	-1.60144		-2.70033	-2.89018	2.84472	2.41816	2.02931		-2.36333	1.47575	2.86237	2.06322		2.4427	-0.706731	0.182327	2.11906	-1.48529	-0.794986	-2.1515	-1.98161
							2.98151	-1.12935	-2.48767	1.09176	1.634	2.54731			1.0564	-1.86248	2.77448	-1.14469	2.61998	-2.32387	-2.34809	1.93882		2.98151	2.42255	1.87271	1.634	0.917356		1.59734	0.524736	-2.90458	2.79244		-0.303747	0.259372	0.967859	1.55153	-1.2727	-2.74915	-1.70285	-2.29371
							-3.1359	2.82896	2.41771	1.88402	-1.51797	0.432356			-2.335	-1.75612	1.67207	-0.00189933	2.37879	0.181139	1.32496	2.60681		-3.1359	0.0167065	-1.0946	-1.51797	0.0179978		0.421996	-0.508463	-1.38804	-0.852057		2.53133	2.77958	0.649777	0.490223	2.97914	-0.104659	-0.973809	-1.9917
							-2.7558	3.11745	-3.1039	2.77609	-2.44748	-2.30362			-1.95986	-0.788971	0.731914	0.529766	1.66548	1.03527	-1.80994	1.35715		-2.7558	-0.802111	-1.77526	-2.44748	-0.959746		-0.486805	2.4012	2.16803	0.0457793		3.09971	1.49362	2.04835	-0.179667	-2.24733	-0.705251	-0.400146	-0.944839
							-2.49618	3.13353	-1.89328	-2.13133	2.631	-3.10975				-2.3509	2.04278	-0.0235459	0.955675	-1.77773	-3.09558	1.15294		-2.49618	-1.58878	2.06416	2.631	3.10013		2.84689	1.71371	1.05845	0.906626		-2.68227	1.44197	-3.06387	-2.21503	-2.95544	-1.81286	0.861589	-0.390161
							-1.76487	2.23508	1.33362	1.20024	-3.11285	2.3689				-0.639306	1.4444	-1.04836	0.362943	-0.26911	2.7904	-2.22655		-1.76487	-2.04163	1.66727	-3.11285	2.49004		2.53856	0.107514	-2.64599	2.84715		-1.88418	0.0309895	-2.03644	2.18759	1.67868	-2.84685	-1.2798	-1.04581
							-1.51995	-2.45525	-0.796957	2.12603	-3.00538	3.12624				0.625158	1.33101	1.62152	-1.32802	1.44766	-2.3333	1.6375		-1.51995	2.97162	1.2507	-3.00538	1.84312		-3.11661	1.33696	2.60124	-2.84795		0.40779	0.450713	0.0480031	-2.28087	-2.65745	2.81236	-2.71083	-0.443521
							-2.41235	-1.15155	0.531866	1.07305	-3.13321	-3.05631				0.878183	-1.22201	1.61435	-1.68981	2.52585	-2.83398	2.17645		-2.41235	1.97025	3.13993	-3.13321	0.468947		2.74126	-1.88599	-2.29502	2.34977		2.23166	-2.42685	1.58078	1.9158	2.60199	-2.92472	2.97689	0.309383
							-0.83355		-1.00734	1.62726	-0.880971	-2.80036				1.33181	-1.67698	1.48258	-0.796713	1.49274	-2.27046	2.10094		-0.83355	1.22819	-2.02774	-0.880971	1.1355		2.4276	2.56092	1.74557	1.54193		2.14237	-1.86418	0.888942	2.56736	-1.29983	2.62037	-2.33208	0.737817
							1.02795		0.578264	0.172688	-3.11278	3.10049				3.08996	1.30227	2.3715	-0.0768644	2.92746	-2.95901	1.36927		1.02795	0.35475	-1.19881	-3.11278	2.3276		2.81657	-3.11764	2.51911	1.57336		-1.92175	0.311155	1.66362	-2.08977	1.13709	0.674814	-1.42422	1.27128
							1.52484		-2.04503	1.54366	2.83193	1.65635				3.11279	-0.407609	2.60279	0.804125	-1.59714	-1.86539	2.65218		1.52484	-0.521432	1.80855	2.83193	-2.09847		-0.564521	-2.18391	0.0634871	-2.90969		2.906	-0.723219	2.69237	-0.97421	-1.51415	-1.50559	-0.934942	2.23382
							-2.02082		-1.6461	-0.112093	-2.97527	1.03517				-2.71626	-1.57548	1.67114	1.68931	2.05873	0.345629	-2.65608		-2.02082	2.12025	-2.10667	-2.97527	-1.6746		1.98934	1.77831	-2.89606	2.4007		-1.86076	-0.184717	-2.74612	-1.83881	-2.35526	-1.07477	-1.48824	2.9701
							-1.37891		-1.66934	0.870833	-2.4166	0.46254				-1.96929	-2.23385	0.887289	0.693002	1.24174	2.14773	-0.641008		-1.37891	-0.108924	-1.64756	-2.4166	-2.48858		-2.94546	2.58778	-1.82624	1.74351		3.0045	-1.90837	1.23059	-0.712644	-3.00374	-0.0864907	-2.97391	-2.53682
							-0.336705		-2.34495	2.0109	2.90749	2.00663				-2.31178	-2.87006	-0.784109	0.385303	1.67831	0.720469	-0.154418		-0.336705	-2.14593	-0.357061	2.90749	-2.20286		0.0151615	-1.55539	-2.95003	2.92934		1.66277	-1.38338	-0.665821	-1.35413	1.5506	0.153249	-1.79228	-0.66973
							-2.09792		0.702728	2.67998	-2.75968	1.31738				1.43457	2.62497	-1.69454	1.08023	-2.93625	0.104092	-1.16538		-2.09792	-2.88708	2.10382	-2.75968	-0.28576		-2.31153	-1.03938	3.08422	0.864773		1.79126	0.689926	2.81609	-0.145038	1.9555	-0.355485	-2.63412	0.346055
							1.56917		1.69262	2.11458	-2.07601	2.63592				2.22115	-2.72489	3.05551	-0.329053	-2.32425	-0.0203646	-1.7313		1.56917	-3.13169	-2.3008	-2.07601	2.73912		1.74626	2.98774	-2.49338	1.77035		2.97675	-1.38343	-2.7849	-2.79547	2.43538	-3.05209	1.03577	1.23781
							-0.730845		1.3677	2.59656	3.09367	-3.03048				2.76343	0.466362	1.07304	1.45403	0.536184	0.517745	-1.07675		-0.730845	-0.424808	-1.43696	3.09367	2.29918		1.89606	2.77895	-2.57926	1.57717		2.70302	0.674393	3.07543	2.42042	-0.841527	-3.0036	1.46443	1.93385
							-2.88866		-0.224379	-1.67707	2.5781	-2.34746				-2.82838	-0.543967	1.4664	2.03486	1.22934	-3.13425	1.60275		-2.88866	-1.1305	-2.60738	2.5781	1.56203		2.61424	2.07409	2.69934	1.11784		0.0920084	1.1374	-0.284845	3.06317	0.033462	-1.09385	2.72774	2.52628
							-3.09933		2.21436	-1.19204	-2.83118	-2.79671				-2.01477	0.366236	-2.7084	2.71786	1.58322	2.52118	2.5389		-3.09933	1.88324	0.191225	-2.83118	-3.11401		0.619586	2.80301	2.67534	-0.988997		3.12985	0.365751	-0.845957	-2.79605	0.0648625	-0.0731702	2.31448	-3.1388
							-2.91635		-2.53096	-1.64641	-1.97428	3.03123				-2.53664	-0.45197	-1.71777	0.379837	0.19635	0.317454	-1.24241		-2.91635	0.550928	2.35528	-1.97428	-1.66465		3.00641	-3.09083	1.59097	-0.117154			-0.301316	0.179904	-2.1402	-1.2801	-0.925771	1.67434	0.127737
							2.67859		1.7488	0.303032	-1.43018	-3.02567				-2.55014	-1.2066	-2.98495	-0.6366	0.725143	-1.2197	-1.68578		2.67859	1.23586	3.0085	-1.43018	2.00204		-2.82577	2.72767	1.27652	2.0069			0.502334	-3.05665	-2.48663	-2.16609	0.249131	1.59826	0.976276
							0.842541		-1.23691	2.92705	0.470792	-2.55659				-1.9045	-0.656159	2.55665	-1.58907	-0.833531	0.422754	1.45276		0.842541	-0.471225	-2.70319	0.470792	-1.94638		-0.111949	-3.10997	2.50652	0.393274			-0.244677	2.12375	-0.916998	3.11464	1.17257	2.67909	1.77928
									1.62035	-2.76651	2.78793	-3.13803				-1.20908	2.29973	1.83815	1.01223	0.349608	0.109213	1.6902			2.27628	-2.11245	2.78793	-1.87885		1.63267	-2.5125	-1.17358	-2.78348			-1.3607	2.86887	2.4653	2.52816	1.31825	3.12155	2.40093
									2.26594	2.63121	2.44623	-2.88261				0.695664	-2.95061	0.399546	-0.234917	2.07711	2.10915	-2.46554			2.81821	-2.68979	2.44623	2.11786		1.00555	-1.53831	-0.469298	-1.87642			-1.53695	-1.57565	2.62389	-2.59155	-0.656939	2.83764	0.320547
									-1.68878	1.1872	-2.97073	2.29856				-2.88656	0.565686	-0.313476	-1.68924	1.21427	3.05631	-2.08514			0.521787	2.34725	-2.97073	2.1618		-2.24834	-2.72576	2.44664	-1.63925			-2.19644	-3.05438	-2.2795	2.83646	3.02887	1.57558	-2.71967
									2.23529	-1.66847	-2.47707	-2.89629				0.0881667	-0.329129	-0.941014	-3.13006	1.68614	-0.893776	-0.842623			2.85163	2.0368	-2.47707	-1.89459		2.9535	2.99907	0.230825	2.06276			0.180027	0.512992	1.68276	2.38081	-2.49379	2.48213	-2.46245
									1.47232	-0.800621	2.50235	1.49312				3.02698	0.436339	-0.219927	-2.64927	-0.768212	-0.440012	2.0049			-2.43544	-0.911445	2.50235	-0.719237		-3.06185	-2.79823	-0.792676	1.07121			-0.47581		2.43754	1.32118	-1.81904	1.94205	-1.58129
									1.25188	0.438432	2.46069	1.96417				-2.42624	0.816314	1.19243	2.89214	0.0841139	0.048091	2.73284			1.03731	-0.28106	2.46069	-1.57933		2.79595	-1.30752	-0.0955909	0.432914			2.04422		1.55138	0.258807	-2.95498	-2.22223	-0.785538
									-2.30349	2.53394	-0.77162	0.148385				-3.05817	-0.126544	2.29087	2.80331	0.861266	-1.47548	-2.82942			2.23378	-2.18389	-0.77162	-2.44656		1.72487	1.0382	2.48377	-1.10741					3.1149	0.908726	-2.86623	-0.605574	-1.1392
									-2.35108	2.1462	0.669378	-1.19644				2.35105	1.3578	1.11038	2.19183	2.35012	1.1751	-2.88407			1.7592	0.731085	0.669378	-2.11255		-2.07756	-1.49978	1.0177	2.46077					-2.43243	2.66777	2.86251	1.08865	-2.39114
									-0.680829	-2.86523	1.92235	2.72601				2.77761	2.28876	1.78654	1.17405	-2.43595	-2.3283	2.17292			-2.72508	2.66743	1.92235	2.69289		3.06656	-1.34171	2.60708	2.21124					2.41763	1.75684	1.23784	1.04126	-2.86229
									0.00232803	3.0039	-2.59093	-2.98849				-2.75415	-3.0809	2.24901	0.519041	-1.64629	1.66473	2.47219			-3.09186	-1.67741	-2.59093	1.20881		-1.61924	0.197755	3.13083	1.31754					3.01932	1.03344	-1.18233	0.732966	-3.06671
									-0.455187	-2.4004	-1.73299	-1.35983				3.04186	-2.41462	2.96292	-0.401007	-3.11817	2.52583	1.34097			2.44804	-2.27807	-1.73299	3.02479		-0.880205	1.7858	3.05786	3.03416					-1.83963	0.458095	-0.384751	-2.0902	-2.9526
									-0.510099	0.519108	-2.74298	2.98086				0.304601	-1.97842	0.150318	-1.13739	-2.84147	1.06899	0.80449			2.02973	-0.700605	-2.74298	1.26361		-2.69421	-1.02574	-1.40878	3.01455					-2.81389	-3.13828	0.362238	-1.12522	2.79579
									0.551994	1.54579	0.00424893	2.98625				-1.65038	-2.03231	2.45866	-1.74888	-2.1873	-3.13236	-0.294884			1.4007	-1.31013	0.00424893	0.349382		0.135209	-1.61876	-2.35821	-1.39387					2.62107	3.11906	2.16016	0.455952	-3.11572
									-0.505542	2.87082	2.66358	2.38887				-0.48204	1.60229	-2.53685	1.40811	-1.09496	-2.72913	-1.40094			0.510433	1.6524	2.66358	2.62622		-2.5866	1.69688	-1.20841	0.554519					2.39971	2.77553	2.36162	-0.297571	3.08426
									-0.884473	-2.67393	-2.87347	1.3169				0.659032	2.38832	-0.587351	2.01894	0.177744	1.86827	-2.79367			-0.449948	0.880496	-2.87347	0.741523		2.27388	2.22073	1.01951	-2.98709					1.92838	-2.70624	1.90094	-2.42725	-2.75408
									-0.0114721	-3.13998	0.490174	1.60409				1.18324	-2.4192	0.190027	1.28675	1.64703	-1.05084	2.2667			2.15066	-1.27279	0.490174	0.157563		-2.24642	-0.929494	2.06196	2.40818					2.71801	-1.93161	2.67227	0.380771	3.07484
									-2.82	-2.11383	1.19513	-2.61261				-1.52433	-1.03508	1.1489	-3.02931	2.51559	-1.371	1.71097			1.2507	2.17442	1.19513	2.47147		0.409107	-1.85399	-2.46209	1.68354					-2.61585	-1.19773	2.04974	-2.82491	-2.67487
									0.650969	-0.899972	-2.93957	-2.09044				-2.32208	-1.21847	-1.77754	2.32486	-2.20614	-2.80664	0.661924			0.359011	1.69609	-2.93957	-1.16171		-2.90975	-2.45184	-2.49724	0.136731					-2.04932	-0.460279	2.64748	2.91913	-0.88156
									2.87447	-0.185049	-2.63985	-2.39854				-3.11918	-0.662962	0.0970163	1.0308	0.660638	-1.60313	-0.765689			1.77509	2.5751	-2.63985	-1.06898		0.911106	1.46389	-1.6935	-3.02199					-2.52452	1.8668	0.198518	1.81854	-0.839494
										-1.30943	2.09682	-1.37182				2.86261	-1.89949	0.78531	0.753541	2.72445	-0.314614	-1.80338			2.9001	0.50712	2.09682	-0.492194		1.68703	3.08468	-2.24444	-3.00745					-1.55585	2.25892	1.387	2.49822	-0.0631487
										-1.94596	1.49438	-2.20126				3.13111	-1.88358	-2.14575	1.2644	-2.8009	-2.44818	-2.62505			1.54004	-1.93113	1.49438	2.69363		3.01694	2.16404	-2.55576	-0.953655					-2.73658	1.333	-1.38492	-2.89954	1.11714
										-2.38339	0.41585	2.77714				2.40726	-1.25569	-1.24154	1.12115	-2.9375	2.18755	3.0013			2.89571	2.13434	0.41585	-2.33518		-0.256909	2.67051	-3.11755	0.966279					-1.50532	3.06436	-0.122823	-3.0891	1.79068
										3.09743	-0.927117	2.13146				-3.08696	-0.28363	0.00218799	1.83098	-0.779552	2.30823	1.7181			2.1405	-0.126285	-0.927117	0.375124		-2.96772	0.736677	2.90718	-2.54719					1.28851	2.1903	0.85906	-2.98539	-2.88708
										2.98866	-0.962858	3.05948				-2.70622	-0.876969	-2.614	2.37461	-1.6616	2.1281	0.460348			1.80904	0.76606	-0.962858	0.0818022		2.58903	-1.47582	-0.229199	0.855084					1.3683	1.28965	1.62994	-1.7291	3.04403
										-2.5032	-1.58077	-2.61581				0.679874	-0.489204	-1.58672	-3.032	-1.75024	1.95027	-0.669894			-0.539631	-3.03541	-1.58077	1.35232		-1.92266	2.8268	-1.38365	1.70558					0.833962	0.0932867	0.666967	-1.23268	-2.97265
										3.10148	-2.8082	2.88109				0.126501	-1.10647	0.312825	2.84872	-0.801019	-0.0677324	-1.56519			2.73211	3.07755	-2.8082	2.18232		1.35717	0.145506	-2.36667	-0.0441836					-0.347467	-2.01016	1.59323	-3.10339	-2.07218
										-2.69863	-2.82935	-2.67192				-0.312725	-0.295797	1.74183	2.61868	1.30587	1.19183	-1.28059			0.0691351	-0.856235	-2.82935	-1.11588		0.390698	-0.391665	-1.24556	-0.407902					-2.2777	2.95047	2.23428	2.88907	-0.00889703
										-2.52225	2.80308	-1.9867				2.29642	0.357444	0.813346	3.10253	1.32267	2.49041	-1.69057			-1.48455	3.05163	2.80308	-1.35771		-2.6813	2.00073	-1.30734	2.38194					-2.89353	-2.79149	3.09476	0.372349	2.03736
										-0.170128	2.36449	1.97659				-1.09711	2.61898	-0.524245	-2.91122	1.96054	-0.920198	-2.21957			-3.0713	2.84568	2.36449	-2.98772		2.97413	2.69325	-0.376196	-3.00466					-2.09164	2.84232	2.62589	1.12077	2.97635
										1.21124	-2.75374	-2.29068				3.03323	1.12833	-1.9363	-2.44113	0.392707	2.85905	-1.09309			2.55211	-2.81623	-2.75374	-2.47288		2.35659	-0.20424	0.203708	3.00631					-1.47056	0.184722	-2.76445	1.58845	2.72757
										0.56357	1.61687	-2.97359				-2.56847	-1.89807	2.40349	0.162424	0.743453	0.660503	-0.611211			1.60462	-2.42855	1.61687	-1.88389		0.048713	2.79758	-2.76603						2.02021	1.13611	0.803225	-1.02567	-1.64686
										0.977967	2.89309	2.33461				-1.5045	-2.75317	1.6594	-0.279408	-0.285981	2.40224	-1.98048			-2.92241	3.07994	2.89309	2.70871		1.86288	-2.31411	0.792628						2.34461	-0.447518	1.65341	-2.96407	-0.466211
										1.10222	2.47709	2.10915				2.33876	2.72602	-1.75847	0.936052	0.684793	-3.04936	0.578623			-2.10923	2.72255	2.47709	0.726725		1.14329	2.74738	-2.41226						0.852704	-2.76355	2.2255	-2.12345	1.46489
										-0.999925	-2.6721	2.10613				3.10496	1.66457	0.439287	-1.12355	1.13103	-1.9392	-0.211965			-2.9027	2.15498	-2.6721	-2.02915		0.176305	-2.93797	2.7552						-2.38454	2.88193	-1.51966	-1.51416	2.80373
										-1.88407	-2.84106	1.49986				0.366005	0.521074	-2.81429	-0.15083	-2.516	-0.388999	-1.08472			2.7839	-2.8788	-2.84106	2.29907		-3.08443	-1.21902	2.0281						-1.79301	0.275834	-2.17518	1.3622	-3.02741
										1.23699	0.7945	1.91881				-1.83431	-1.15332	-0.171846	0.0160683	2.26204	1.3205	-0.780736			1.75347	3.12012	0.7945	2.28237		2.44501	0.482735	-0.16913						1.86668	-1.01591	2.92659	1.95337	2.87092
										2.43318	0.508912	-0.865785				-0.488979	2.95947	2.327	-1.98862	3.12193	1.67194	0.245464			1.00392	-3.0528	0.508912	1.69509		2.67163	-2.77454	-2.92376							-2.49741	2.18537	2.82594	-2.49445
										2.84032	-2.62668	-1.94828				-1.73591	-2.52319	2.92619	-2.46183	1.02532		0.757641			-2.38951	2.68777	-2.62668	-1.75376		1.56176	2.18844	-1.64152							3.10316	3.06183	0.231839	-1.46205
										-3.04222	-1.41088	2.73627				-1.43098	2.47259	-2.67767	2.68264	1.64374		2.50118			1.89936	1.86219	-1.41088	-2.34461		2.4383	-2.96786	-2.58266							2.58786	-0.33606	-1.9195	-2.04431
										-2.73632	-2.52663	2.18273				2.79264	0.880905	-0.242607	2.16667	1.83298		-0.208877			-0.54628	-0.562997	-2.52663	-0.187722		-0.928065	-2.32698	2.75054							2.5003	-1.25514	2.90177	-2.82074
										2.59297	0.421052	1.24822				2.88319	0.293559	2.51075	0.806452	-2.40092		0.508511			-2.43746	0.671815	0.421052	-1.03402		-3.04235	-1.64344	-1.23374							0.433159	-2.42	-2.84702	-2.54938
										-2.66666	-2.76031	-1.17247				-2.01499	-0.360989	-2.71801	-2.1851	3.10428		-0.472753			-1.42692	3.07037	-2.76031	-1.94984		1.3626	0.780392	1.18875							0.741847	-1.00355	1.23589	1.55501
										-2.02403	-1.75187	-2.12201				0.530558	3.05068	-1.70865	-3.02952	-2.78343		-0.504601			-2.34841	1.56204	-1.75187	2.72127		-3.00445	1.90482	2.36706							1.3014	0.772465	-0.310285	-3.03336
										-1.51281	2.03167	-3.03222				1.28836	2.54639	-1.01379	2.86911	0.405724		-1.13638			2.5432	-2.12643	2.03167	1.20076		0.976952	2.72517	-2.98243							-2.58653	1.61779	2.15047	-2.8152
										-0.669566	2.4888	2.61231				2.15981	1.84271	0.607602	2.00761	0.671114		2.54921			1.87402	-1.47893	2.4888	0.0598336		2.46146	-2.19391	0.410365							-2.70444	0.481003	1.94945	-3.03985
										-0.408362	-0.429391	1.87181				-2.98911	1.48395	1.01223	0.675528	0.690193		-2.51996			0.995283	2.84001	-0.429391	-0.878991		2.97694	-2.89203	-0.20012							1.21981	1.36929	2.09599	2.56197
										-1.04935	0.88278	2.82783				-1.43555	-0.522017	1.70007	0.13974	1.76782		2.83393			0.227476	2.51167	0.88278	1.55009		2.02729	2.76541	2.82624							3.06046	2.14343	1.22304	2.98581
										0.103228	0.800461	-3.05673				-2.77484	-1.33481	-2.86609	0.416418	2.59211		-2.55994			0.954345	1.34828	0.800461	-3.1258		1.80445	-2.85248	-0.954448							2.23223	0.661061	-0.324114	1.89433
										-1.78671	-2.10657	2.90765				-2.0839	-0.991862	-2.02663	1.20087	-0.0530525		-1.54684			0.324478	-1.035	-2.10657	2.71284		-0.761017	1.57462	-1.20115							0.764636	1.6596	0.567769	-1.61208
										-0.944691	1.78659	-2.389				-1.85703	-2.12946	-2.95518	-0.291467	2.07154		2.69148			-1.50362	-0.670994	1.78659	1.55289		-1.13099	2.25309	-2.06074							1.50443	1.0324	-1.33512	-1.72403
										-0.786139	-1.67771	0.642477				-1.0753	3.03405	2.27115	1.74114	2.69406		2.17598			0.766002	2.47043	-1.67771	0.253535		-1.83598	-2.87415	-2.3903							0.660828	-1.15153	2.79027	1.97044
										1.49622	-1.64129	1.72258				0.242833	2.73249	1.63977	1.01901	-2.73588		-1.79137			1.27709	2.97118	-1.64129	1.76319		-2.84693	1.106	-2.93024							-0.270455	0.643466	0.866281	1.48443
										-2.89386	-1.44711	2.7016				1.19563	-2.91196	1.1442	-2.1162	-2.13835		-1.13568			-1.62328	-1.62257	-1.44711	2.31072		2.44408	0.409086	2.88242							-2.56048	-0.573665	1.6161	2.11594
										-0.675224	0.109628	-2.78564				1.78202	-1.92773	0.368382	-2.80439	2.12169		-1.86729			-0.769184	2.0104	0.109628	1.75062		-0.200394	-2.86806	2.56358							-0.906865	1.21693	-0.156924	1.57508
										-0.193135	0.878228	1.40366				2.64609	-1.27602	-0.136073	-3.09627	-1.77039		-2.30131			-1.4872	-1.18836	0.878228	2.14004		1.32184	2.85964	-2.4719							-0.204591	2.39125	-3.05536	2.51526
										2.26426	-2.57789	2.1479				3.12017	-0.19291	-0.403392	2.7568	-0.174904		-1.77994			-2.58223	-0.112552	-2.57789	1.55744		2.03061	-3.10325	2.63803							-2.65217	-2.63486	-2.80288	1.50554
										2.96939	-1.32984	2.95662				-2.6739	0.521926	-0.345944	1.35683	1.07113		1.33397			2.82377	0.00241301	-1.32984	1.50325		2.09356	-2.82203	-0.776196							-1.67953	-1.21462	0.0252901	1.51556
										-2.37865	0.683656	-2.80238				-1.81735	0.0710914	0.165963	0.57588	-0.772478		2.67027			-0.100791	-2.44896	0.683656	1.08362		2.47835	-1.61006	-1.98069							0.516999	-2.13086	0.324187	-1.55043
										-1.26633	-2.21416	-2.16336				-0.851833	1.53599	-0.0179167	0.619572	3.11855		3.09258			-0.775476	1.88618	-2.21416	0.119455		-0.621714	-1.03106	-2.12175							2.61615	-2.96751	0.126978	-2.2678
										1.50824	2.97703	-0.105605				0.324586	-2.32154	2.02782	1.19162	2.3415		2.81426			0.929941	3.1382	2.97703	-1.03768		-3.10857	-0.802111	-1.17119							-2.56156	2.69468	0.533471	2.87014
										0.758688	0.0752867	1.66861				1.10991	0.694099	2.91846	2.14938	-0.388292		1.86897			1.83514	0.0796001	0.0752867	3.13473		1.75145	2.3583	-0.372547							-0.276995	2.00221	0.783542	2.07064
										1.42742	-2.01075	0.700606				1.77486	0.983641	-3.04336	2.70237	0.046603		-0.496335			-0.181519	1.67165	-2.01075	1.78519		-0.820037	-2.92009	1.97285							-2.89325	0.983037	0.387683	1.14968
										0.781376	-0.120206	1.71143				-2.66119	2.14828	3.06658	-1.48251	-0.0476255		3.07482			2.57364	0.738355	-0.120206	1.12897		-2.21578	2.23943	1.16601							2.8165	1.9603	1.27849	0.446861
										1.45436	-1.63271	2.38924				2.33603	2.74297	-2.67324	-2.67543	-2.77248		3.0748			1.8251	1.77119	-1.63271	0.136636		1.88913	-3.1286	-2.37757							-2.09471	1.82639	2.23678	-0.216416
										0.523418	1.80878	-3.07719				2.65987	1.19946	3.04038	-1.64993	-2.24401		2.75411			0.964692	2.62127	1.80878	-1.52028		-0.562844	2.5452	-0.599775							-1.53894	2.95181	2.87696	-1.0398
										-1.7489	2.04462	2.49088				-2.88137	1.923	-2.32529	-1.75695	-0.267246		2.14406			-0.565786	0.133048	2.04462	0.0255186		-1.0747	-2.86575	-2.51194							-0.820165	-2.77934	0.0620281	-2.78858
										0.720719	2.16879	-2.55524				-1.12536	1.35744	2.39181	0.380233	0.410457		1.53295			2.41485	0.947118	2.16879	-1.9302		-1.93173	-2.85757	2.94312							0.128301	-2.04277	-1.47358	2.94019
										0.609822	-2.43817	-1.67177				-0.114476	0.535665	-3.12472	-0.660589	2.04438		0.790262			1.13757	1.83957	-2.43817	-2.72554		-2.84343	-2.25296	-0.0581639							1.41549	-1.02315	-0.867121	-1.3521
										1.17856	-1.80097	-0.875318				0.985532	0.127698	-0.700021	-1.47812	1.15008		3.1072			1.21753	2.22669	-1.80097	1.5845		2.90122	-1.33176	-3.10726							2.18176	-1.14245	-1.6652	0.0609162
										0.842836	-2.30123	-2.66039				2.85446	0.738833	-0.0135204	-2.18566	0.710608		-2.56997			2.85361	2.84071	-2.30123	0.586097		-0.436219	-1.79844	-0.93913							2.79572	-2.70869	1.5982	2.00043
										0.565977	-1.96495	0.165008				-2.49538	1.35985	0.438951	-3.08704	-1.05153		3.04005			-0.43482	-2.35468	-1.96495	-0.673376		-0.887869	-2.93464	-2.40592							-2.88749	0.522185	0.71163	2.8058
										-1.70159	0.0314983	-0.571727				-0.986251	2.13623	0.199591	1.97493	2.19363		-2.86502			0.11771	0.155815	0.0314983	-2.34038		-1.34271	-2.27789	3.12853							-0.811214	1.33595	3.10576	3.08464
										-1.09467	-0.922848	-1.42314				-0.146739	2.62098	1.38077	1.37852	-2.86848		-2.13384			1.37541	2.55874	-0.922848	2.6343		2.5821	-1.3319	3.01779							3.04283	2.28127	-1.00269	2.87889
										-1.08847	-1.9044	-0.806589				0.939878	2.52977	2.207	-2.86646	-0.212739		-1.72275			3.06745	-1.92182	-1.9044	1.63771		1.75247	0.198635	2.0052							-2.93948	-2.76158	2.92002	-2.42147
										-0.256226	2.18284	-1.44639				1.94345	2.11999	-2.11826	-2.12564	0.577966		-2.7411			2.7077	1.36242	2.18284	0.620393		2.54139	0.868499	0.485332							-1.63173	0.180878	2.11213	-1.07075
										-0.940691	1.54835	-0.885966				2.54417	-0.364151	0.872419	-1.24423			1.60911			1.44831	-1.90245	1.54835	2.64942		3.00491	-0.675024	2.99634							-2.79168	1.148	-1.13494	-0.413882
										-1.18695	2.70039	0.814456				-1.56881	-2.33559	0.384955	-0.324224			2.20855			1.79534	-3.06265	2.70039	1.29596		2.27136	0.997362	1.0785							-1.31672	1.85224	2.99692	0.855955
										-0.773592	-1.00231	1.49295				-0.76976	-2.49715	1.99764	-1.20269			1.40372			0.813415	2.85354	-1.00231	2.00622		1.85558	0.518757	2.22395							-1.62242	-2.08103	-0.839651	1.31638
										-0.118106	2.20624	-3.09243				0.262492	2.35319	2.68004	0.361364			1.97319			-0.337767	3.05244	2.20624	2.51396		-2.56222	2.18044	-1.66547							-1.08869	-1.35263	0.0213782	-0.860839
										2.92636	-0.496521	2.81525				1.68689	-1.70332	1.68419	1.17175			-2.45828			-0.899545	2.64063	-0.496521	1.75115		0.793803	-0.0667048	1.18966							-3.01352	1.50845	1.79165	2.58258
										-2.66344	-0.433794	-2.87034				2.20482	3.05364	1.16914	0.154023			-0.588086			-1.56127	-3.10265	-0.433794	2.4637		1.87126	-0.23084	-1.59485							2.34126	2.18094	-1.91113	-2.80759
										-1.97342	1.47552	2.83495				2.7969	-2.17906	1.29324	-0.611837			1.76832			-2.7388	0.476808	1.47552	-2.95539		1.0859	-0.0131193	-0.72095							-3.02571	-2.45622	-1.69603	-2.30269
										1.03452	2.96097	-3.10445				-2.75829	-0.984437	0.0494553	-3.10534			2.65625			-2.70333	0.707024	2.96097	-1.80803		-1.66823	-2.88311	-0.583794							3.00232	-1.59803	2.07625	1.81535
										3.01853	0.575671	2.46622				-2.22168	-0.414402	1.5852	2.46615			1.29913			2.58461	-1.58844	0.575671	1.40924		-2.41705	2.76572	-2.87459							2.0001	-0.691282	-2.69348	-3.09186
										1.36753	-1.42633	2.16028				1.5656	0.243043	2.84405	1.63598			2.11324			-1.99791	-2.75351	-1.42633	-1.2943		0.263441	-2.98459	-1.06864							2.53246	0.953437	2.49988	2.82214
										-0.589541		1.52543				2.67686	1.37954	-1.10123	0.977339			2.9073			0.323816	-2.2441		-2.20227		-1.4875	-2.62622	1.1271							-0.0773691	1.58453	2.96482	2.79205
										-2.54849		2.4879				-1.86749	-2.95528	0.764147	0.221389			-2.79011			0.89451	-2.7923		-0.720754		-1.67977	-0.223829	2.11592							-0.0710887	2.30728	2.86405	2.011
										-1.4848		-1.8344				2.18277	-1.83327	-0.776102	-0.197131			-2.44811			2.17277	-3.09552		-1.30869		1.00228	1.77141	-2.10793							1.65623	-2.80626	2.0306	-2.97379
										2.93713		-1.16511				2.81067	0.879935	0.999538	0.740159			-2.32555			1.50192	-2.88954		-1.54214		-2.8371	2.60631	1.22958							-0.0823463	-2.01559	3.03748	2.79716
										2.41775		2.25297				-2.56687	1.35549	-2.55804	1.13757			-0.719132			-1.42469	-1.25745		2.27605		2.77972	-2.47228	2.02387							2.57538	0.888233	3.07176	-1.68095
										-2.84686		3.13823				-1.18241	2.67861	1.75388	-0.959229			-0.175557			-1.9733	-2.58652		0.778683		-2.30993	2.67267	-0.616449							-3.07196	1.87217	1.6057	-2.28155
										3.04684		-2.69684				-0.129214	-1.47661	3.11158	-1.49637			0.792886			-2.60022	0.550611		-0.632015		-3.11228	-1.70273	1.5979							-3.04382	2.75212	-1.52312	-2.86311
										-2.84279		0.911847				-2.44203	1.45929	-1.31846	2.50828			1.59654			-0.086587	-0.607233		-1.52544		1.88262	-2.58954	-0.120685							2.5323	0.0709619	-3.0022	2.86686
										3.04336		1.98082				-1.45951	-1.0302	-0.681902	-0.839517			0.0696371			-0.700929	-2.74813		-2.88137		2.38933	2.6008	2.85965							-1.77288	2.13061	0.793908	2.17203
										-3.03155		1.43179				-1.07259	-0.557589	-1.50592	-1.20581			1.42781			-2.22538	-3.11884		-0.13252		-0.972778	-0.863653	1.39999							2.58009	-3.11888	-1.63586	0.316889
										-2.1856		2.72784				-1.91192	0.0677624	-2.37092	-1.53954			2.14199			2.32821	-1.62824		-0.671995		1.62253	-1.49316	-2.81606							1.87538	-1.14159	0.179536	1.15614
										1.18711		-2.8481				-1.18309	3.1077	1.83459	-0.902779			-2.54996			2.67656	-2.23052		-2.82321		-0.89508	2.00203	1.56473							-0.0863731	-0.979091	-3.11174	2.76511
										-2.03294		-1.91079				3.02017	-2.83439	1.85372	-0.092037			1.55264			-0.750048	1.72236		2.85941		2.24997	-1.38096	-0.967414							2.49208	-1.90668	2.36205	0.173918
										1.76323		1.26288				-2.68108	0.156953	2.68282	-1.96591			-0.831345			-1.09584	0.84298		1.55642		-1.63059	1.26459	0.743448							1.80035	1.69693	1.24637	1.20815
										-1.91196		2.72237				-1.13936	2.03601	0.937551	-0.439364			-1.3949			-0.402485	1.95794		0.726932		2.76349	-0.332397	0.207051							0.715942	2.29993		2.07933
										2.89297		-2.90772				-2.57531	0.17332	1.50902	0.718159			-1.77437			1.46173	0.873026		-0.400725		1.21933	0.198184	0.490351							2.80089	2.7976		0.108907
										-1.88286		2.3892				1.4633	-2.75345	-2.27648	-1.12477			0.841025			-2.24383	1.46485		-1.03993		-0.439193	-0.587812	-0.880923							-2.7716	0.98534
										2.54722		-1.91787				2.01841	3.10151	-1.08819	-1.63798			-3.10474			1.08515	-2.53101		-1.88221		-1.33299	-1.76594	-0.410408							2.78105	1.70779
										1.78976		1.46109				1.57551	-2.35604	2.91402	0.705482			2.81601			0.455257	-3.08827		-2.5015		-2.12171	-0.236674	1.23812							0.647948	-2.59348
										0.465291		1.55202				-2.68745	-0.0433221	0.134469	0.0503966			-3.13865			1.52626	1.9115		-0.474046		-3.12288	1.15646	0.741092							1.64545	-1.55716
										1.68952		2.27054				-2.28202	-0.408841	2.17307	-1.94238			2.24014			-0.773775	-3.13897		1.75623		0.176464	2.07922	-2.65971							2.6709	2.79655
										2.08893		1.16448				2.7112	-2.45147	2.6591	-2.47782			-1.64345			1.36183	-2.80216		-0.27932		-1.83064	2.91143	-1.38677							-0.152452	-0.578229
										0.757715		2.48801				2.85554	2.57718	-1.78413	-2.76269			-2.29646			-2.77961	-1.82354		-1.43599		-2.76578	-2.51674	-0.717178							1.05403	0.913265
										-1.12882		0.523888				0.751175	-1.62005	0.202795	-1.66291			0.655037			1.79164	-0.392345		0.415583		1.31651	-1.88545	-0.566277							1.40722	2.27142
										-2.07106		-0.170958				1.27748	-1.05994	1.05905	-1.67962			1.10893			-2.56881	1.41628		-0.402627		0.292839	-0.243472	-0.84673							0.68074	-2.10472
										-1.26798		1.98104				-0.207768	2.94862	-2.24795	-0.269243			1.66376			2.53244	2.70909		2.68787		-2.8678	1.32214	-1.50158							1.44058	-0.984422
										3.05229		2.77809				0.731718	-2.47305	-3.12462	0.515931			1.18678			1.72626	0.690661		-0.466034		-2.57526	0.901408	-1.18012							-1.87825	-1.89543
										1.94675		-2.61592				-2.02681	3.04667	2.73156	0.13542			3.13942			0.856404	-2.04766		2.73699		2.68253	2.16432	2.62055							1.57119	-2.326
										2.46432		2.10702				-1.54617	2.68668	2.16595	1.53981			-3.07234			1.59733	2.70857		-2.79205		2.10992	2.88441	-1.25969							0.626974	-2.00236
										0.954125		0.336133				-0.371885	-2.84805	-2.75434	-2.34262			-1.65327			-2.8274	-0.386586		2.3952		1.95405	2.75743	-0.684819							-0.0818276	-2.24602
										-2.54872		-0.822532				-1.48646	3.0579	-1.39041	1.32012			-2.76606			0.0424001	-0.884179		-2.88335		-3.12171	-2.93123	0.430507							0.531368	2.64682
										0.348327		-0.212155				-0.421805	2.79048	0.175519	0.329447			2.07436			-1.79344	2.8717		2.86159		-3.10912	2.57521	2.19093							-2.56329	0.617106
										-0.839442		0.412223				-0.131418	-2.88274	2.56971	-0.651012			-2.58973			-0.841033	1.37546		-2.14596		-0.601924	2.50492	-2.65489							2.22905	2.89257
										1.91819		-0.94196				1.1844	-2.03125	-2.41322	1.40414			2.68253			-0.204808	2.59291		-0.925451		-0.394863	-2.82497	0.493929							0.991565	-1.93737
										-2.71959		-0.108923				0.210213	-2.36031	-1.09513	1.94659			2.81799			-0.0416483	-1.96802		0.52499		-1.15004	-2.1671	0.615584							0.00936433	2.42543
										-0.621845		0.537735				-0.617925	2.74555	2.90009	2.30704			1.99509			-2.8841	-2.94788		-0.869303		1.04199	0.355075	1.49134							-0.738092	0.516462
										2.7056		-2.49155				-2.73593	-2.54127	2.87824	1.15891			1.30516			1.45172	3.05623		2.328		2.04415	-2.60084	-1.08804							-0.389969	2.86236
										-2.92897		-2.40816				2.18548	-1.90504	-2.79648	1.03461			2.62112			-0.476052	2.41607		1.98653		1.15727	0.533977	2.59358							0.128593	-2.5695
										-1.36301		2.91582				0.908356	-0.646563	2.51941	0.265682			-0.432404			-1.23396	-2.66108		2.3165		-0.198398	-1.68967	2.49794							0.47486	-1.84973
										-0.293518		-2.62442				0.352786	0.035184	0.225024	1.48651			-3.09351			0.266644	2.77417		1.46059		3.11084	1.82637	0.182193							-2.28855	-0.652081
										-2.83842		-1.92941				2.49647	1.14934	1.47722	0.47968			-0.481078			-2.52946	-2.84726		0.769514		1.54944	2.4574	-0.612133							-0.196968	-1.906
										-2.08705		0.105731				1.39361	1.80993	-3.11623	0.345668			-1.28351			0.787346	-2.7446		2.55747		1.0283	2.86203	2.4436							-0.650476	-2.84342
										-2.68211		-1.02071				0.374958	2.54675	-2.43061	1.17211			-0.672908				2.65788		1.32936		1.67177	-3.0751	1.5778							-1.68273	-0.63093
										-1.94529		-2.60178				-0.28544	-2.34061	0.714313	0.486533			0.922				0.829567		-1.32462		2.30839	2.71115	1.9674							0.229573	-2.32325
										0.803713		2.91339				0.0747018	-2.27777	0.118625	-2.58736			0.319631				-0.460109		-0.364159		-1.49159	1.91334	-3.09234							1.98245	-2.58866
										-2.54811		2.17254				-0.800055	-0.652119	1.26325	-2.58872			2.14377				-1.51652		0.2636		2.81735	-1.59784	2.84431							-2.44268	-0.100748
										2.80448		1.33875				0.412559	0.0148192	-2.83226	-0.387673			-2.58435				-1.09521		-1.23622		-1.1642	-1.6549	-3.0899							-1.49481	-0.380103
										2.23488		0.796898				0.192338	0.172318	2.46761	-2.69381			2.57112				2.25621		0.916162		1.00945	-1.59447	-2.08895							2.43876	2.55765
										1.40151		-0.199323				-1.36028	-0.567551	1.77718	0.951555			-2.78943				2.9063		2.58849		1.50935	-2.85317	-3.00284							3.11866	3.06291
										-2.91957		-1.26971				1.96591	-2.13544	-0.225376	2.81874			2.31479				2.40284		-2.41526		-2.11619	-1.08054	1.9878							-1.95981	2.52777
										0.0811032		-2.79081				1.45401	-0.156001	-0.891322	-3.09153			-3.08731				1.84516		-1.25134		-1.29714	-2.59499	-0.00107831							-1.28362	3.06206
										2.55973		2.48252				2.22179	0.464516	2.83778	-2.07683			3.13839				-2.42679		-0.63912		-0.257744	-1.73031	-2.06314							-1.93745	2.65479
										3.11555		1.30667				1.07596	-2.86491	2.01458	0.382382			-1.23582				2.51073		-0.0999877		-0.8437	-0.793158	-1.03334							2.41062	1.66021
										-2.28772		-0.503878				0.388298	-2.29287	1.17105	0.760307			-0.272127				-3.08438		0.527606		2.77369	2.06829	-1.0727							3.07245	1.777
										2.42521		1.14734				1.05323	-2.47903	-3.05946	2.67134			1.62066				0.0864622		0.19571		2.22267	-1.2571	-0.692891							3.1047	1.41527
										-0.687973		-1.74486				-0.0603402	2.3873	0.271869	-2.16089			2.714				2.67954		-2.42069		-1.69348	1.75755	-1.10377							-3.11896	-2.97806
										-2.03116		-2.87953				0.773865	1.24269	-0.0877982	1.15668			-0.536182				-1.32115		-2.88104		1.06145	3.09144	-2.38962							-2.82831	-1.78646
										0.799321		-2.79511				-0.852622	2.69297	1.00427	1.98915			0.124041				-2.08257		-2.52386		-2.10489	-2.9647								2.26459	-2.52645
										1.76489		2.65316				0.217923	1.40672	2.47061	2.90667			0.884765				-2.98557		-2.19098		2.07688	1.85141								-3.07195	2.60763
										-2.75703		2.73872				0.763297	0.328456	0.908865	-2.37395			1.5102				-3.02001		-1.81397		2.1404	-2.54477								-1.92619	-2.77258
										1.229		1.23499				2.94904	-0.57899	-1.6228	-2.82057			1.11301				2.832		1.49105		-1.20157	-1.24626								-0.92213	1.90445
										0.0676112		-0.890214				-2.48001	-1.27581	-0.947138	2.93865			0.772032				-2.75812		0.648984		-2.57559	-0.27845								1.76456	1.35436
										0.244325		-1.39886				-1.77904	2.86099	-2.05363	-2.29892			2.76763				1.51928		2.97937		2.22145	0.335499								-2.68319	2.69295
										1.02097		-1.58349				-0.927421	2.23294	-2.57537	-1.28596			1.81104				1.60907		-2.74129		-0.163808	-3.14068								-0.0059997	-2.13872
										2.99012		-0.231432				0.0173605	2.89087	2.58297	-0.674382			1.11796				-1.4519		0.392537		-0.795145	-2.40833								-0.78961	-2.78132
										-2.33577		0.749827				0.530436	-2.83972	1.49663	0.194046			2.11533				-0.447271		-0.567529		0.0436238	-1.45571								-0.964326	3.03601
										-1.6157		1.40755				2.75095	-0.848229	-1.90337	1.66993			2.81616				0.201882		-1.81372		0.507869	-0.262643								-0.446039	1.91773
										-2.8215		2.81397				-2.22952	2.82692	-1.20212	2.56501			2.06174				0.140309		-0.638814		-0.408864	-2.91696								0.0960328	0.732881
										2.76865		2.34909				-1.66829	2.82453	-3.10861	-1.29496			0.0208552				-2.95892		1.04125		1.98063	2.01669								1.40406	-2.51194
										1.24131		-1.43829				-1.03489	0.0575236	-3.11296	-0.463486			-3.02907				-2.35471		0.563443		1.49011	1.25008								-0.613083	0.213518
										1.93978		-0.908427				-0.113088	2.59203	2.05728	-1.60412			2.14861				-2.49882		1.85375		-2.79686	0.104548								1.31119	2.48226
										1.0383		-2.43471				0.610459	0.0968586	0.588859	-2.65828			-0.841027				-0.506019		-2.55861		-1.2404	-2.66155								3.10902	-1.07001
										-1.53198		1.66114				1.45824	1.0378	-0.0474277	2.66034			2.10677				0.378836		0.604799		-2.62071	-1.90522								2.62928	2.27308
										-0.990657		-1.09459				2.00112	2.03932	-2.13855	2.62112			1.52748				-0.973993		-1.80788		0.845345	-2.50085								2.5351	1.62458
										-1.63793		2.6285				2.98775	1.66044	-1.25318	2.46191			0.834285				2.79162		-1.30137		-0.300264	-1.51771								-2.72219	-2.31098
										-1.3298		2.29402				0.825084	0.886301	-2.7721	2.52616			-0.467671				-3.12295		0.614837		-1.963	1.01607								2.41746	0.267726
										-0.265437		2.87503				-0.21089	-0.324534	2.87962	-1.96246			0.851142				1.19906		1.5324		0.960646	2.28846								2.07034	3.02853
										-1.87218		2.51554				-1.30124	-2.69372	2.26998	-1.31452			1.86118				1.78347		-2.82984		2.14796	-1.95158								1.31523	2.73636
										-2.76024		-1.22654				-0.0415142	-1.64019	1.70386	1.60396			-3.02353				-2.88795		2.44865		-2.82994	-1.66586								2.4226	-0.299018
										3.03065		0.213126				-0.979124	2.77738	1.7068	0.013222			1.84143				-2.44201		-2.98215		-2.61105	-0.974483								-3.10625	0.365823
										-3.03513		0.518673				-2.00277	-2.86382	2.85415	-1.17912			1.92014				-0.674986		1.26677		1.45826	2.9489								2.49461	1.11344
										-2.50053		-0.142028				-2.49002	-2.46214	-2.45859	-0.649714			0.326687				0.740068		-1.06623		2.58139	0.859683									-2.8887
										1.55168		-0.548578				2.84097	-2.83228	1.86845	-0.935124			-2.47038				1.62392		0.0474838		1.96737	-1.79051									-0.62845
										2.29462		0.0448666				-3.00426	-0.623665	1.31049	-0.0402704			-0.229334				1.70519		2.49476		1.0645	-1.13329									0.392341
										2.81731		1.25075				-0.0117172	-2.18275	0.396293	0.65354			0.279717				-2.9027		-0.793151		-2.78627	1.97787									-1.06296
										2.99359		2.23608				1.88364	2.90817	0.930169	-2.53161			-0.571809				-1.81474		2.46378		-1.14705	-1.89482									1.48045
										-2.17043		2.24623				2.71373	-1.243	2.2134	-1.39695			-2.85404				2.1543		1.70211		0.987588	-2.52084									-2.80907
										-2.88598		1.60321				2.13929	1.06959	-2.86627	-0.597353			-2.20156				0.859639		-2.35557		-2.88256	-2.13173									-0.849245
										3.05342		0.935935				1.60525	0.241569	-0.745916	-0.390253			3.11702				2.13993		0.540549		0.253941	-2.97762									0.419498
										2.76133		-0.192365				0.550613	-0.325495	-0.189778	1.25535			1.39214				2.09752		-3.12569		1.12069	2.37598									2.33747
										-3.03225		2.19718				0.0011455	-1.21581	3.06483	0.261056			-0.747813				0.360486		-2.81017		2.82756	1.67224									-3.09839
										-2.38953		1.48645				0.719406	2.22811	3.00167	-0.931104			-1.50663				0.320948		-0.18438		-2.31673	-1.25009									-1.40078
										-3.11136		-1.9366				0.203051	-2.82259	2.03581	-1.59661			-0.706389				-2.96086		1.0146		-0.305444	0.561925									-0.495295
										-2.13084		2.44166				-0.753081	2.5282	1.77829	-2.8131			-1.41453				2.7567		2.27703		1.262	-2.11209									2.4333
										2.18092		-2.90152				-0.0224592	-0.540041	2.35217	2.61169			1.20225				-3.07916		-2.07799		3.13687	-3.08623									1.13906
										-3.06827		3.11176				0.768719	-1.14137	-2.97984	2.40377			3.02606				2.48242		-3.01792		-2.84112	2.30689									2.73029
										2.43336		2.52495				0.257107	-2.18441	-2.58883	1.27083			-2.79194				-0.339348		2.988		-3.11827	2.64017									-2.8235
										1.90208		1.58156				1.18628	-2.89331	1.83185	0.477371			-2.05793				-0.586992		-2.84092		2.47668	-3.11188									-1.27664
										2.81126		0.975532				-1.31023	2.65034	2.58217	-2.85622			-2.50875				-2.07586		-2.24692		-0.392463	2.61826									-0.602657
										-1.60829		1.79516				-0.71006	1.79053	-2.88938	-1.43458			-1.58309				0.768718		0.661975		1.4723	1.8612									0.166196
										-0.551474		1.64655				0.186289	0.833522	-1.44473	-0.609773			-2.34272				2.79532		1.4433		-1.34016	2.23456									0.970915
										-2.23101		-3.12761				1.76418	0.179439	-2.35472	-0.380109			-0.652343				-0.151184		2.27001		-2.36337	2.67381									0.341545
										-0.212693		0.589701				-2.73405	-2.55281	0.103932	0.86003			-0.353949				0.922139		-2.30424		1.98937	-0.0342796									-2.14139
										-0.266167		1.09997				-1.66066	3.08169		0.0252161			-0.667081				2.20164		-1.40524		-0.825097	-2.16713									-0.502012
										-1.07828		-2.02192				-0.93301	3.07727		0.272704			2.84217				2.58448		-2.87451		-1.7395	2.12564									-1.6895
										2.42315		-2.56729				-0.0961384	2.82622		-1.18062			-2.60279				2.0641		-2.09011		-3.09243	2.66159									-1.67866
										-2.87338		-2.99574				0.566139	1.98042		-1.1483			-2.12066				-2.22996		1.88134		2.44203	-1.79676									-0.876462
										2.48052		3.08899				0.0109309	0.756016		3.1025			2.83364				2.82665		1.05403		-1.75706	3.04964									-0.343809
										1.40577		0.362218				1.61491	-0.149583		0.76727			2.81074				1.02609		-0.271041		1.84993	0.852422									2.82088
										-1.44226		0.0833129				2.38149	-0.860127		1.02293			0.114618				2.99589		-2.34182		2.43346	-2.84515									-1.89137
										2.88398		-0.191417				-2.79945	-2.81451		-2.67486			-1.42821				1.88567		-3.0276		2.37698	-1.81544									-1.49013
										1.95425		-0.913452				-0.11657	3.08079		-0.936395			1.76986				2.2479		2.54062		1.91665	-2.69902									1.45527
										2.72939		-1.35987				-0.574589	-3.06208		-0.346131			-1.88607				-2.4074		1.82955		2.96813	-2.14284									-2.02708
										-0.202449		-0.54757				0.484494	2.49566		0.347339			2.60955				-0.0725586		1.13999		-2.34547	-2.68128									-0.555459
										-0.970871		0.929512				2.81067	-2.10495		-1.08887			-1.07921				2.5502		0.601209		-3.04859	3.06254									-0.285466
										2.63456		0.396221				1.78061	2.66054		1.86565			0.853549				0.601177		-0.480552		0.315206	0.983663									2.549
										-2.82219		0.451441				1.3045	2.02261		-2.72314			-2.37492				-0.0613925		-1.07131		1.0958	2.35589									0.657231
										0.826198		0.122155				2.06219	1.14137		1.75118							-1.94219		2.08481		3.04938	-2.09117									-2.75617
										-0.574367		2.02545				2.68122	0.663185		-2.32134							-2.63983		-1.38516		-3.07322	2.17996									2.81125
										-1.23925		2.63138				1.66283	0.905755		3.10264							-1.55777		0.964616		-1.27711	-2.22938									-2.113
										-0.752441		-0.645562				1.19936	-0.066045		-0.124219							-0.0262132		-1.25632		2.66154	-1.59593									-2.62297
										0.996844		-1.50624				0.0960001	2.49755		-1.14155							-2.24977		-3.0705		2.22255	-1.30292									2.33679
										1.66527		-0.139894				1.62789	-1.62548		3.10004							1.0834		2.64573		-1.80957	-2.1798									0.509315
										0.425387		2.30714				1.59729	0.259555		-2.54625							1.91176		-2.25599		-2.34857	2.60814									-0.022564
										-0.455277		-2.32394				-1.4121	-0.652416		2.27953							-1.92743		-2.80046		3.12604	2.11553									1.50881
										0.27343		1.93825				-1.16063	-1.45258		-1.47307							-2.90415		-0.467245		-3.10161	3.07722									1.06108
										-2.33459		0.897345				-1.63214	2.67834		2.354							2.70279		-0.952513		-2.5073	-3.0806									3.02991
										-1.27242		2.09553				-1.40253	-2.19806		-1.81492							1.40978		-2.87403		-1.08377	2.77959									-3.03949
										-0.746412		-3.10108				2.96063	-1.38557		-2.85671							3.05855		0.0397611		2.74766	1.83519									2.80978
										1.08315		2.52089				-2.06853	-2.1739		2.91906							-2.18133		-1.54481		-2.58991	1.23045									3.03917
										-2.34215		2.75606				2.03187	0.830495		-1.46169							-1.0571		-0.773136		1.01913	2.33579									-1.46104
										-0.949884		-3.10149				-2.00625	-2.38659		-0.700657							3.08497		-1.86408		1.94527	-2.95409									-2.65896
										-0.487347		-2.438				-2.13485	2.92831		-1.31459							-0.141194		-1.16797		-2.60245	-2.24421									-1.78237
										1.65745		-2.88149				-1.38615	0.209263		-0.200756							2.89131		1.58974		-2.06574	-1.04049									-2.49485
										-0.314538		-1.69041				-1.02637	2.25786		0.384825							-0.466216		0.605802		2.18627	-1.00653									-1.32959
										1.50032		-2.44937				2.59336	-0.84233		-1.99043							1.34663		-0.0918084		-2.75398	3.04823									-0.203673
										0.442948		-0.270358				2.08468	-0.504357		0.819156							2.77926		-0.970514		-1.96003	-2.75114									-1.0669
										-0.592328		-1.08623				2.86186	0.282067		-0.124885							-1.27749		-2.09625		-0.00588235	-1.8628									-1.66848
										1.22827		2.92981				2.04216	0.19578		-1.17062							-0.432439		-3.01812		2.80088	1.81266									-1.51675
										0.507468		1.13524				1.1728	0.66544		0.766174							-0.633261		2.45708		1.92726	-0.68814									-2.53682
										1.16584		-1.92436				0.330446	-0.499109		-1.48741							-2.84946		1.6928		2.22028	-1.56641									-1.02099
										1.83697		-2.75672				-0.48444	2.25644		1.5606							-2.13954		1.40103		0.9657	-1.76215									-2.02296
										0.567687		-2.23038				-1.12007	1.28619		-2.95861							-1.75235		1.28034		0.449094	-0.486561									-1.30169
										0.800812		-3.10112				-1.90598	2.89096		1.18632							1.74745		-1.68171		2.98749	0.125203									-0.908326
										0.136899		-2.47055				2.01116	2.15471		0.680822							1.90395		2.41965		2.09767	2.20755									-2.2589
										-0.917114		3.03589				0.419918	1.4825		-0.32236							-2.83397		-2.61883		-1.75216	2.89137									-1.76206
										-0.361702		-3.13072				-0.863348	-3.13161		2.81243							-2.48631		-0.999105		0.54891	1.44845									-2.41611
										-0.104512		-2.24803				-1.5694	2.92672		0.508149							2.87295		-3.04363		0.511355	0.979665									-1.57501
										-2.60104		-2.06699				-2.41693	-0.836016		-2.73908							-0.530642		2.49162		-0.641097	2.1382									-2.21958
										0.525419		-3.12707				2.42502	0.173908									1.93086		2.99843		-1.39392	1.15356									3.02855
										-0.125915		3.12594				1.09921	2.02822									-1.82209		-2.84046		-1.98779	-1.7068									-1.96682
										0.974391		-2.84397				0.548238	2.82904									2.41601		-1.50853		-1.62643	2.59257									-1.22511
										1.01691		3.00968				-0.944261	-2.74278									0.199687		-0.232597		-1.78536	0.135124									-2.97618
										0.960048		-2.54271				-2.72681	-0.900717									1.76593		0.401069		-2.3464	-1.55922									1.11881
										2.70488		-2.00207				-1.94912	-1.6609									2.81959		-0.87171		-2.93797	1.03844									1.79
										-2.12055		-2.83813				-0.968377	-1.00632									2.73638		1.7191		-0.552087	2.13643									-3.01756
										0.322831		-2.03577				0.306309	-0.401253									2.53451		-2.22574		-3.05602	-3.02087									-2.01377
										3.12721		-2.97617				1.61361	-1.24821									-1.18851		-1.38879		1.88495	-2.15702									-0.198208
										2.59607		-2.357				2.23351	-0.1105									-2.46462		-0.524473		2.59041	2.22737									1.07311
										2.72659		2.7112				-2.18225	2.44307									-0.251162		-1.79133		2.50141	-0.906331									2.38919
										-1.01725		1.93431				2.87079	3.11141									2.71728		-2.58445		2.54488	2.04159									3.06355
										1.37026		-2.64912				-2.88285	-3.01439									-2.5369		-3.04051		-2.15993	2.35473									-1.72053
										-3.02152		-3.11541				-3.12641	-1.7532									2.73515		2.71415		0.692434	-3.1319									-0.531197
										0.0310433		3.08439				2.80111	-1.12664									-2.88993		2.1755		-2.72851	-3.06763									0.997814
										2.02915		2.8586				-2.79183	-0.649668									-0.721822		2.66251		0.75311	-0.243498									3.08963
										2.87096		-2.66209				1.71297	0.899049									1.30647		1.67534		2.43173	1.98849									-3.02591
										0.568989		-2.02026				0.986706	2.34151									2.48815		0.972712		-3.06567	-1.40874									2.31629
										2.41422		-2.75022				0.896767	-2.49319									2.95281		3.09167		2.63086	-2.40395									0.829519
										-1.55342		-0.0753713				-0.663846	-1.7847									-2.51858		1.14166		-0.160326	-2.8593									0.162203
										-2.3737		0.518406				0.204198	1.76069									-1.04201		1.71858		0.786686	2.51285									2.49551
										1.93691		1.78908				-0.968497	-2.00351									-2.40769		0.125399		-2.23496	1.99189									2.95335
										0.0562175		2.2959				2.45184	0.382179									-2.03701		-1.75864		2.17862	1.15596									-1.23695
										-0.972897		-0.351437				2.62882	0.449702									1.36723		-2.42621		-0.0830332	0.897837									1.87018
												-1.24392				-2.43045	2.01183									2.12165		-1.59446		-0.919067	-2.00971									-0.769928
												-2.20086				-1.64777	2.57236											2.65637		1.80566	2.89815									-1.81168
												0.837621				-0.992496	-2.6594											-2.82535		1.59714	3.12807									-2.68508
												0.0611663				1.28685	-2.38919											2.48266		-0.565373	-3.08885									-0.117499
												1.62546				-2.04398	-2.88615											-2.94224		1.57516	-1.79507									2.17399
												0.270821				1.40833	-2.13437											-2.88302		1.28169	-0.38793									-1.3437
												0.557978				2.52928	2.83131											2.39005		1.37242	-0.466622									2.66924
												1.50574				-0.343983	2.1362											1.58345		-0.698024	1.02423									-3.00461
												-2.73088				0.407266	0.960965											0.535284		1.93941	0.412658									2.61201
												2.87905				-0.891233	1.86612											-0.745955		-2.71731	1.68648									0.246429
												-0.700875				-2.82579	1.65413											-1.63469		-1.95787	-2.88125									-1.6462
												-1.94239				-2.51733	-2.59987											0.822652		-3.05939	-2.77774									-2.11813
												-0.797922				-1.11685	0.710512											1.64905			-0.955732									2.72188
												-2.81926				-0.591096	2.08055											2.19938			0.656785									1.85649
												2.28564				-2.94968	-0.11396											2.59316			-1.95846									0.992931
												-0.618258				2.51498	0.270253											-0.415551			-2.8546									0.163349
												0.363504				1.60086	-0.749604											1.46417			0.474993									-1.04218
												2.70868				0.785134	-2.13217											-1.83037			1.83315									-0.441732
												2.77986				0.212915	2.85153											0.597472			-2.49925									-3.07975
												2.57219				0.521178	-1.79345											1.8936			-0.745313									1.82524
												0.464603				-0.231931	-0.644595											2.56787			-1.54255									1.01226
												-0.30028				-0.554397	-1.55888											-3.03105			-0.465048									2.80159
												1.92461				-1.70845	-1.77163											-2.90652			2.87973									-1.27032
												1.72747				-2.83971	-0.478228											2.6894			-2.83924									0.365346
												1.84711				2.8726	0.803475											1.51674			2.89879									2.31911
												-2.75029				-0.469977	1.17591											0.781025			-2.77205									2.86616
												2.71408				-1.43573	-2.83824											-0.213749			2.9461									0.754666
												3.06306				2.7686	2.96994											-3.0285			1.77535									0.042036
												3.07113				2.1376	-2.92299											1.88932			1.65461									2.4776
																-2.97297	-1.8639											2.72693			-0.576614									-2.58412
																-2.15277	-2.88296											2.19106			1.39442									0.439979
																-0.327819	1.37412											1.28694			0.852512									0.747236
																-1.52922	1.44105											-0.75062			1.10854									1.21913
																-0.353573	1.38221											-2.21866			1.66188									0.69135
																0.551193	0.349423											1.14346												-2.62972
																1.26138	-0.178442											2.55442												3.05554
																2.06976	1.1241											-3.10531												1.86425
																0.868288	-1.50702											2.53056												0.0144064
																1.82304	-0.943995											-1.03199												0.199483
																1.03251	-0.416206											-2.71843												1.56616
																1.7425	2.65288											-2.49914												0.773414
																2.66604	-2.12126											2.17434												-2.7812
																-3.14099	-0.408535											3.05018												1.12272
																-2.83657	-0.193596											0.277125												-0.160634
																-1.43547	0.88432											-0.049216												-3.00167
																-2.20599	1.52303											-0.844752												-1.68788
																-3.07609	2.13852											2.7963												-0.949028
																0.825663	2.68123											-0.592554												1.93422
																0.00831835	-0.634783											-2.43343												2.38936
																2.22844	-0.884306											-3.02782												-1.81472
																-0.958054	0.585021											-2.13923												2.42266
																2.24851	-0.558088											-2.89308												-2.05777
																2.35949	2.69638											-1.10682												-1.37833
																2.99331	-2.57957											-2.27392												-2.42607
																0.819274	2.06792											-1.6659												0.961362
																-2.78136	0.69784											-2.74282												1.85831
																2.68964	-0.309679											2.85616												1.00688
																-2.93011	-1.839											-0.459776												1.70811
																0.400885	-0.47225											1.1039												2.78199
																1.73128	-1.32699											-2.55067												-0.531705
																2.1127	-0.410389											-2.12424												-0.018332
																1.69214	1.186											-2.7461												2.06205
																2.29136	-0.53706											0.6879												2.3046
																3.08154	-1.47359											-1.09851												1.59412
																1.91062	-0.512876											-1.8634												0.616332
																1.3483	0.0799384											0.439179												0.215659
																-0.0630587	0.965996											-2.22123												-2.76449
																-1.02298	0.546508											-1.76868												-1.80743
																-1.69677	-0.229532											-2.13451												0.879641
																-1.01479	-0.909673											-0.846797												1.87541
																1.18576	-0.414613											0.892087												-0.185841
																0.49956	-0.903074											-2.39009												-1.46087
																-0.954839	-0.0888823											0.076265												-0.519371
																1.85438	1.125											1.72312												0.111686
																2.33011	0.015472											2.78202												-1.42171
																0.829641	-0.671093											-2.32467												2.3584
																0.148079	1.43398											-1.65814												0.707503
																-2.55149	1.36442											-0.766311												-1.92417
																2.51742	0.816903											-1.94474												-2.95828
																1.85243	2.83375											-1.11229												-1.33315
																-2.97198	1.60634											-3.04598												-0.565346
																2.09314	1.39807											-1.50874												1.35869
																0.75489	-1.19732											-1.9423												0.910511
																1.45318	2.59213											-1.26605												1.6293
																-1.10041	-1.34759											-0.454353												1.89104
																0.212092	1.2981											1.08517												0.830252
																-3.08539	0.256199											1.56633												1.53833
																2.63627	2.51263											-1.7962												-2.08722
																-0.64445	2.01058											2.6713												-1.00097
																3.08482	-2.81782											-2.00931												-1.53259
																-2.87464	1.84409											2.94178												2.60277
																1.58266	0.679016											-0.510612												0.65324
																2.25835	1.01											-2.4023												0.158298
																-2.93586	0.813157											-1.02744												-2.91026
																2.8345	1.45278											1.77811												3.09516
																-2.28496	2.21974											2.81082												2.75029
																3.11846	-2.39256											-3.09262												-0.483106
																2.51925	3.06341											3.12174												-0.882694
																1.70012	2.23797											2.45264												-1.68701
																-0.0406934	-2.25104											1.70764												1.62082
																-0.775058	-1.70931											0.354358												1.8659
																-1.40891	-0.902482											-1.74319												1.73533
																-2.27249	-0.563179											2.35074												-1.81019
																2.96939	0.938014											-0.417265												1.64848
																2.58965	0.409136											-2.34143												-0.707411
																0.833678	-2.76373											-0.39027												-0.30293
																0.151671	2.89917											2.18472												1.13184
																2.26048	-2.30081											2.77944												1.87544
																-2.70361	-0.899884											-2.97774												2.78203
																0.234653	-0.516537											1.1872												-2.89764
																-2.4879	1.8772											2.50378												2.5492
																3.12011	1.40758											-1.50787												1.73702
																1.07877	2.81729											0.807393												-1.97109
																1.78403	-2.97421											1.2637												-2.31265
																0.679816	-2.5641											-2.32766												1.50458
																-0.143431	-2.39405											-1.77163												2.39996
																-0.863489	0.477904											1.87335												-2.81636
																-1.87871	2.13361											-2.51194												3.0941
																3.03421	3.05222											-2.41477												-2.24177
																-2.91599	1.95301											-2.9637												-0.393234
																-2.8971	2.89393											0.643982												2.6251
																-1.04866	-2.78135											-0.134977												1.58817
																2.8343	-1.28757											-1.28036												1.87929
																2.34178	2.97096											0.54298												1.02932
																3.1152	0.0511692											-1.83515												-0.163836
																-2.01723	0.0521626											-2.07766												-1.27009
																1.78005	2.25675											0.837384												-0.355279
																0.227046	2.92646											-2.17452												0.957346
																-2.13298	-1.26894											-1.18925												3.03252
																3.0972	2.07488											-0.451646												-0.889297
																-3.04636	-1.34024											-1.43487												-3.12748
																-3.10538	0.620901											-1.80479												-2.45227
																2.64872	-0.556828											-2.63997												-1.75578
																2.12392	0.0320002											-1.95186												-1.09764
																0.178946	-2.64247											1.89004												2.22393
																2.75393	-2.35198											2.22535												-2.22253
																1.76106	2.48592											2.83207												-1.17764
																0.775972	1.5393											-1.37281												-0.0378155
																-1.15296	0.813339											-2.93426												-1.7394
																2.47473	0.259052											-2.66925												2.04549
																-2.75878	-2.74254											1.78353												2.77196
																0.594546	-2.63104											1.02367												-0.115918
																-2.91068	2.84298											-1.20494												1.65526
																2.76883	-1.28259											-0.331052												-2.19355
																-0.00999399	-1.81984											-2.31699												-1.74828
																-1.9528	2.44184											-2.86985												-0.501575
																1.50521	-1.34988											0.982891												-0.991549
																1.61467	-0.736354											-0.20685												1.18944
																-0.0890629	1.74446											0.960678												-1.19178
																2.9859	-0.3059											1.73596												2.40803
																1.9905	1.62696											2.52932												-2.775
																0.308566	-1.88049											-0.623442												-2.28928
																-2.81229	-3.05198											-1.32497												1.60687
																-0.325158	-3.10325											-2.16897												0.199095
																-1.25263	-0.65308											2.70463												-0.858424
																-0.252039	1.27896											1.96231												3.07823
																-2.8285	-2.25188											-0.210685												2.803
																2.73227	-0.0955212											-0.880051												2.78808
																0.353357												2.16226												2.73396
																2.06431												-2.98104												1.32712
																0.770675												-1.65043												-0.585798
																-1.79447												-0.729302												-0.505832
																2.82459												-1.17358												-1.56282
																1.95095												2.52045												-0.902407
																1.04519												0.503499												-1.97068
																0.517181												2.77797												-2.48223
																-1.83994												1.31334
																-3.14016												-1.60072
																-3.11335												-2.20342
																2.6535												2.2732
																2.11224												-0.011724
																1.15783												1.44724
																-0.605257												-1.50498
																-0.474455												-0.675894
																-0.900667												-1.39925
																2.4788												2.15759
																-2.14188												-0.123378
																-1.06622												1.21869
																-0.203329												0.228283
																0.391098												-0.578312
																0.963184												-0.390769
																2.40477												-1.10541
																-2.76921												-0.357295
																-1.95191												-0.660967
																-1.1393												1.10392
																-0.660485												2.07972
																1.56889												2.5283
																-1.51531												1.98061
																-1.50147												-1.19661
																-2.22737												-0.424939
																-3.06785												-0.970971
																2.62545												-1.90982
																1.61034												-2.88966
																0.387876												2.37185
																3.04158												-0.892327
																-2.60736												0.917361
																-0.620614												-2.01783
																-0.138155												-2.24432
																-1.68394												-0.0748691
																-3.02328												0.967784
																2.65301												1.47327
																0.610128												0.905662
																1.10242												2.5374
																-2.93661												1.97095
																-0.91149												2.50976
																1.77166												0.729294
																2.49138												-3.09632
																-2.38673												-2.67599
																3.09056												2.02586
																2.91437												-1.69008
																2.88511												-2.95039
																-3.01471												-2.77091
																-2.54786												-1.20202
																-2.23626												2.64715
																2.8748												-1.94577
																-2.91753												-2.44009
																-2.37692												2.52741
																-1.59305												3.108
																-2.52586												2.26528
																-0.926558												2.72238
																-1.44018												-0.916757
																-3.00292												-2.61092
																0.350337												-0.809852
																0.950098												-2.86135
																-1.67107												-2.33966
																1.55764												2.49251
																2.20826												-1.11563
																3.12574												2.76488
																-2.94047												2.68127
																2.27061												0.490651
																-2.95605												-0.974049
																2.41176												0.229759
																1.40492												-0.968008
																0.692701												-0.00304735
																2.96108												1.86528
																-1.55677												-0.562784
																2.84796												0.847868
																1.20654												0.0147853
																3.0752												2.85624
																-3.10012												2.13708
																-1.16787												1.73519
																-0.196943												2.88471
																0.101519												2.78234
																-3.10041												0.210894
																2.18265												-0.0128978
																3.01134												-2.50317
																2.47293												2.23573
																2.2333
																3.0977
																-2.48663
																2.82652
																-3.04851
																-3.05913
																-2.25944
																-1.18216
																-0.115798
																0.514391
																2.49393
																-2.58959
																-1.97178
																-1.21851
																-0.688904
																0.427
																2.75405
																-1.13013
																1.88357
																-2.43535
																-1.94736
																2.02648
																0.659993
																0.42837
																-0.157327
																-0.80883
																-0.649887
																-1.75803
																1.09231
																0.178205
																-0.411639
																0.444215
																-0.147773
																-0.770387
																-0.138713
																0.922485
																2.94328
																0.48648
																0.56408
																2.73937
																3.13425
																2.97744
																-2.62449
																-1.56424
																-2.14325
																-1.25169
																-1.84272
																-0.789744
																0.790524
																-2.189
																2.70084
																1.56054
																1.81485
																2.69865
																-3.13271
																2.68155
																1.54093
																1.18633
																0.653299
																-2.38683
																-1.50151
																-0.377063
																2.18038
																-1.02081
																-2.39702
																-1.72729
																-2.71479
																-2.18546
																1.92215
																-2.30068
																-2.36411
																2.60647
																0.904573
																0.64779
																-0.459555
																2.39682
																1.76418
																2.36276
																1.39356
																-1.62206
																-0.584093
																-3.10224
																-2.42126
																-1.44456
																-2.88777
																-2.4522
																-2.82169
																2.57439
																1.63525
																1.84194
																1.2989
																1.81285
																-3.04658
																-2.85477
																-2.42561
																3.12746
																2.72693
																-2.3437
																-2.93219
																0.892271
																1.66214
																0.934639
																-3.01266
																2.64509
																-2.88647
																-1.49067
																-2.84199
																3.07396
																-2.60632
																-2.75884
																-2.37989
																-2.95459
																2.30575
																1.09752
																0.469685
																2.87363
																0.217401
																-0.568641
																-0.760533
																3.01702
																2.53874
																1.60231
																2.22523
																0.346121
																2.11428
																1.2151
																-0.0742144
																-0.702333
																-0.133773
																0.326443
																-0.375444
																1.54101
																2.36641
																1.56146
																2.49254
																-1.18542
																1.68048
																0.865766
																0.20355
																-0.293945
																0.970029
																0.693317
																1.67128
																0.978518
																2.28619
																2.62247
																-3.06392
																1.98144
																2.92354
																1.96518
																2.59618
																-1.13052
																-1.70213
																3.10897
																3.01415
																2.82903
																1.84554
																0.389375
																0.816165
																0.871473
																-0.192441
																2.55369
																2.88955
																-2.768
																3.13176
																-2.89225
																1.83652
																1.40211
																2.02669
																-3.08883
																-2.80997
																-1.60942
																-0.880791
																-0.697721
																0.137867
																0.891004
																1.59557
																-2.89653
																-0.188739
																0.640919
																2.05737
																2.65884
																-2.57223
																2.56104
																1.9192
																1.27666
																-2.04723
																-1.13392
																-0.0989494
																0.46084
																-2.71162
																2.59721
																-0.671964
																-2.99982
																3.06628
																-2.42438
																-2.1354
																2.88031
																3.13252
																1.94759
																-3.12138
																-2.55907
																1.33172
																2.77059
																0.821078
																0.190083
																-0.501034
																0.218342
																-0.327685
																0.405677
																0.780121
																0.0889916
																0.124344
																-0.930635
																-1.65682
																-0.388592
																0.155501
																2.57909
																0.597165
																-2.82476
																-2.69218
																-2.14782
																2.56396
																1.5962
																-2.5153
																2.69997
																-1.39896
																1.19044
																1.49613
																2.46101
																-2.94887
																1.8296
																-0.610553
																2.80929
																-2.80487
																-1.64697
																-2.77451
																2.81636
																2.18017
																1.52878
																-0.214901
																-1.10859
																-3.11013
																-0.289413
																-0.313691
																0.776667
																-2.09302
																0.26574
																-0.139661
																0.646601
																-0.864825
																1.75419
																-2.78165
																-1.33243
																-2.83385
																2.90389
																1.04404
																-3.10982
																-2.07926
																-1.05511
																-1.56941
																0.668984
																1.3265
																0.863203
																0.362519
																-0.942887
																-0.43825
																2.18988
																1.47548
																-2.69523
																-2.54238
																-1.29091
																0.0901314
																0.74004
																-2.52421
																-1.79308
																-0.700343
																-1.51177
																-2.88608
																2.89394
																2.15836
																-0.826817
																-0.324972
																-1.45953
																-2.79878
																-0.480886
																-1.39957
																1.35082
																0.573902
																1.32498
																1.91131
																2.54224
																-3.08969
																-0.696474
																-0.0683113
																-1.03363
																-1.3898
																-0.424085
																0.699171
																0.0383396
																-2.94483
																-2.36966
																-1.12825
																-0.517597
																-1.80173
																-2.55117
																0.122999
																2.793
																-2.10961
																-2.18163
																-1.35867
																-1.57238
																1.58059
																-0.311549
																2.25243
																2.02092
																2.58851
																-2.8308
																1.15317
																2.96845
																-2.28092
																-1.65699
																0.714679
																2.62217
																1.36867
																-2.50656
																-1.24438
																-0.596569
																2.61067
																2.30551
																-2.64453
																-1.22466
																-2.11252
																-0.275545
																-1.27378
																0.769043
																-2.33643
																0.976653
																1.42268
																0.0315053
																0.982635
																-0.672164
																1.88129
																-3.07514
																-1.72107
																-0.546732
																2.2868
																0.766134
																-0.667371
																-0.760416
																-0.237463
																2.2512
																-0.405784
																1.20678
																-2.97202
																-0.0674599
																-0.69622
																1.06296
																-1.98184
																1.8394
																-0.0936338
[truncated: 20 more columns]
