# Supplementary material for: Feeding state functionally reconfigures a sensory circuit to drive thermosensory behavioral plasticity
Source: eLife. 2020 Oct 19;9:e61167. doi: 10.7554/eLife.61167 (PMC7644224; doi:10.7554/eLife.61167)
Supplement: Figure 2—source data 1. [file elife-61167-fig2-data1.xlsx]

## Sheet: Fig 2A
N2_fed_NGM	N2_st_NGM	N2_fed_Histamine_during stv	N2_st_Histamine_during stv	odr-1p_hiscl_fed_NGM_during stv	odr-1p_hiscl_st_NGM_during stv	odr-1p_hiscl_fed_Histamine_during stv	odr-1p_hiscl_st_Histamine_during stv		N2_fed_NGM	N2_st_NGM	N2_fed_Histamine_during assay	N2_st_Histamine_during assay	odr-1p_hiscl_fed_NGM_during assay	odr-1p_hiscl_st_NGM_during assay	odr-1p_hiscl_fed_Histamine_during assay	odr-1p_hiscl_st_Histamine_during assay
0.10386	-0.10458	0.32574	0.27316	0.28444	0.085784	0.22299	-0.03153		0.10386	-0.10458	0.24957	0.072264	0.28444	0.034514	0.29976	0.22227
0.31208	-0.00516	0.38182	-0.17222	0.15268	0.034514	0.22304	0.096		0.31208	-0.00516	0.37879	0.17875	0.16364	0.085784	0.11472	0.081673
0.36488	-0.09735	0.31957	0.093878	0.39239	-0.00179	0.2615	0.02299		0.36488	-0.09735	0.41337	0.00179	0.39239	0.071502	0.37112	0.40235
0.28445	0.06718	0.44141	0.054642	0.45984	0.05122	0.45637	-0.20443		0.28445	0.06718	0.37374	0.094941	0.13287	0.051392	0.50243	0.17552
0.32703	0.1127	0.2465	0.13694	0.44942	0.027529	0.19137	0.01724		0.32703	0.1127	0.45982	0.139241	0.15268	-0.00179	0.18313	0.012853
0.2844	0.096	0.23391	0.065334	0.16364	0.092121	0.23838	0.10416		0.2844	0.096	0.3846	0.1139	0.45984	0.05122	0.72494	0.41848
0.4638	0.05122	0.34496	0.129241	0.13287	-0.02253	0.11778	0.031219		0.4638	0.05122	0.2998	0.09712	0.44942	0.027529	0.25852	0.30853
0.2875	0.02753	0.35982	0.0139		0.045021		0.064662		0.2875	0.02753	0.3842	0.1202		0.092121		0.22234
0.2823	0.10583	0.2846	0.10712		0.051392		0.061186		0.2823	0.10583				-0.02253
0.1927	0.08972	0.3198			0.071502				0.1927	0.08972				0.045021
0.39423	-0.09471								0.39423	-0.09471

## Sheet: Fig 2B
N2_fed_NGM	N2_st_NGM	N2_fed_ATR	N2_st_ATR	ceh-36p_GtACR_NGM_fed	ceh-36p_GtACR_NGM_st	ceh-36p_GtACR_ATR_fed	ceh-36p_GtACR_ATR_st
0.32	0.05	0.57	-0.17	0.6	-0.1	0.583333	0.48
0.29	0.11	0.3	-0.05	0.555556	0.38462	0.357143	0.666667
0.45	0.08	0.38	0.2	0.8	0.066667	0.285714	0.181818
0.39	0.058	0.21	0.14	0.375	0.090909	0.454545	0.5
0.38	0.12	0.5	0.12	0.692308	0.21429	0.375	0.5
0.49	-0.04	0.65	0.08	0.4	0.2	0.538462	0.166667
0.24	0.1	0.48	0.04	0.454545	0.142857	0.615385	0.5

## Sheet: Fig 2C
frame (2Hz)	wt-fed	wt-stv			wtfed	wt-stv	Time
1 to 30	0.0952	0.0455			0.7143	0.3182	0
31 to60	0.1429	0.0455			0.7143	0.3182	0.5
61 to 90	0.0952	0.0909			0.7143	0.3182	1
91 to 120	0.1429	0.0909			0.7143	0.3182	1.5
121 to 150	0.0952	0.2273			0.7143	0.3182	2
151 to 180	0.0476	0.1818			0.7143	0.3636	2.5
181 to 210	0.0952	0.3636			0.7143	0.3636	3
211 to 240	0.1429	0.3636			0.7143	0.3636	3.5
241 to 270	0.1429	0.4545			0.7619	0.3636	4
271 to 301	0.1429	0.4091			0.7619	0.4545	4.5
					0.7619	0.4545	5
					0.7619	0.4545	5.5
					0.7619	0.4545	6
					0.7619	0.4545	6.5
					0.7619	0.4545	7
					0.7619	0.4545	7.5
					0.7619	0.5	8
					0.7619	0.5	8.5
					0.7619	0.5	9
					0.7619	0.5	9.5
					0.7619	0.5	10
					0.7619	0.5	10.5
					0.7619	0.5	11
					0.7619	0.5	11.5
					0.7619	0.5	12
					0.7619	0.5455	12.5
					0.7619	0.5455	13
					0.7619	0.5455	13.5
					0.7619	0.5455	14
					0.7619	0.5455	14.5
					0.7619	0.5455	15
					0.7619	0.5455	15.5
					0.7619	0.5455	16
					0.7619	0.5455	16.5
					0.7619	0.5455	17
					0.7619	0.5455	17.5
					0.7619	0.5455	18
					0.7619	0.5455	18.5
					0.7619	0.5455	19
					0.7619	0.5455	19.5
					0.7619	0.5455	20
					0.7619	0.5909	20.5
					0.7619	0.5909	21
					0.7619	0.5909	21.5
					0.8095	0.5909	22
					0.8095	0.5909	22.5
					0.8095	0.5909	23
					0.8095	0.5909	23.5
					0.8095	0.6364	24
					0.8095	0.6364	24.5
					0.8095	0.6364	25
					0.8095	0.6364	25.5
					0.8095	0.6364	26
					0.8095	0.6818	26.5
					0.8095	0.6818	27
					0.8095	0.7273	27.5
					0.8095	0.7273	28
					0.8095	0.7273	28.5
					0.8095	0.7273	29
					0.8095	0.7273	29.5
					0.8095	0.7273	30
					0.8095	0.7273	30.5
					0.8571	0.7273	31
					0.8571	0.7273	31.5
					0.8571	0.7273	32
					0.8571	0.7273	32.5
					0.8571	0.7273	33
					0.9048	0.7273	33.5
					0.9048	0.7273	34
					0.9048	0.7273	34.5
					0.9524	0.7273	35
					0.9524	0.7727	35.5
					0.9524	0.7727	36
					0.9524	0.7727	36.5
					0.9524	0.7727	37
					0.9524	0.7727	37.5
					0.9524	0.7727	38
					0.9524	0.7727	38.5
					0.9524	0.7727	39
					0.9524	0.7727	39.5
					0.9524	0.7727	40
					0.9524	0.7727	40.5
					0.9524	0.7727	41
					0.9524	0.7727	41.5
					0.9524	0.7727	42
					0.9524	0.7727	42.5
					0.9524	0.7727	43
					0.9524	0.7727	43.5
					0.9524	0.7727	44
					0.9524	0.7727	44.5
					0.9524	0.7727	45
					0.9524	0.7727	45.5
					1	0.8182	46
					1	0.8182	46.5
					1	0.8182	47
					1	0.8182	47.5
					1	0.8182	48
					1	0.8182	48.5
					1	0.8182	49
					1	0.8182	49.5
					1	0.8182	50
					1	0.9091	50.5
					1	0.9091	51
					1	0.9091	51.5
					1	0.9091	52
					1	0.9091	52.5
					1	0.9091	53
					1	0.9091	53.5
					1	0.9091	54
					1	0.9091	54.5
					1	0.9091	55
					1	0.9091	55.5
					1	0.9091	56
					1	0.9091	56.5
					1	0.9091	57
					1	0.9091	57.5
					1	0.9091	58
					1	0.9091	58.5
					1	0.9091	59
					1	0.9091	59.5
					1	0.9091	60
					1	0.9091	60.5
					1	0.9091	61
					1	0.9091	61.5
					1	0.9091	62
					1	0.9091	62.5
					1	0.9091	63
					1	0.9091	63.5
					1	0.9091	64
					1	0.9091	64.5
					1	0.9091	65
					1	0.9091	65.5
					1	0.9091	66
					1	0.9091	66.5
					1	0.9091	67
					1	0.9091	67.5
					1	0.9091	68
					1	0.9091	68.5
					1	0.9091	69
					1	0.9091	69.5
					1	0.9091	70
					1	0.9091	70.5
					1	0.9091	71
					1	0.9091	71.5
					1	0.9091	72
					1	0.9091	72.5
					1	0.9091	73
					1	0.9091	73.5
					1	0.9091	74
					1	0.9091	74.5
					1	0.9091	75
					1	0.9091	75.5
					1	0.9091	76
					1	0.9091	76.5
					1	0.9091	77
					1	0.9091	77.5
					1	0.9091	78
					1	0.9091	78.5
					1	0.9091	79
					1	0.9091	79.5
					1	0.9091	80
					1	0.9091	80.5
					1	0.9091	81
					1	0.9091	81.5
					1	0.9091	82
					1	0.9545	82.5
					1	0.9545	83
					1	1	83.5
					1	1	84
					1	1	84.5
					1	1	85
					1	1	85.5
					1	1	86
					1	1	86.5
					1	1	87
					1	1	87.5
					1	1	88
					1	1	88.5
					1	1	89
					1	1	89.5
					1	1	90
					1	1	90.5
					1	1	91
					1	1	91.5
					1	1	92
					1	1	92.5
					1	1	93
					1	1	93.5
					1	1	94
					1	1	94.5
					1	1	95
					1	1	95.5
					1	1	96
					1	1	96.5
					1	1	97
					1	1	97.5
					1	1	98
					1	1	98.5
					1	1	99
					1	1	99.5
					1	1	100

## Sheet: Fig 2D
Histogram	AWC			Cumsum
time	wt-fed	wt-stv		fed	stv	time
1 to 30	0.15	0.15		0.7	0.8	0
31 to60	0	0.1		0.7	0.8	0.5
61 to 90	0.1	0.1		0.7	0.8	1
91 to 120	0.2	0.05		0.7	0.8	1.5
121 to 150	0.15	0.1		0.7	0.8	2
151 to 180	0.1	0.1		0.7	0.8	2.5
181 to 210	0.1	0.1		0.7	0.8	3
211 to 240	0.2	0		0.7	0.8	3.5
				0.75	0.8	4
				0.75	0.9	4.5
				0.75	0.9	5
				0.75	0.9	5.5
				0.75	0.9	6
				0.75	0.9	6.5
				0.75	0.9	7
				0.75	0.9	7.5
				0.75	0.9	8
				0.75	0.9	8.5
				0.8	0.9	9
				0.8	0.9	9.5
				0.85	0.9	10
				0.85	0.9	10.5
				0.85	0.9	11
				0.85	0.9	11.5
				0.85	0.9	12
				0.85	0.9	12.5
				0.85	0.9	13
				0.85	0.9	13.5
				0.85	0.9	14
				0.85	0.9	14.5
				0.85	0.9	15
				0.9	0.9	15.5
				0.9	0.9	16
				0.9	0.95	16.5
				0.9	0.95	17
				0.9	0.95	17.5
				0.9	0.95	18
				0.9	0.95	18.5
				0.9	0.95	19
				0.95	0.95	19.5
				1	0.95	20
				1	0.95	20.5
				1	0.95	21
				1	0.95	21.5
				1	0.95	22
				1	0.95	22.5
				1	0.95	23
				1	0.95	23.5
				1	0.95	24
				1	0.95	24.5
				1	0.95	25
				1	0.95	25.5
				1	0.95	26
				1	0.95	26.5
				1	0.95	27
				1	0.95	27.5
				1	0.95	28
				1	0.95	28.5
				1	0.95	29
				1	0.95	29.5
				1	0.95	30
				1	0.95	30.5
				1	0.95	31
				1	0.95	31.5
				1	0.95	32
				1	0.95	32.5
				1	0.95	33
				1	0.95	33.5
				1	0.95	34
				1	0.95	34.5
				1	0.95	35
				1	0.95	35.5
				1	0.95	36
				1	0.95	36.5
				1	0.95	37
				1	0.95	37.5
				1	0.95	38
				1	0.95	38.5
				1	0.95	39
				1	0.95	39.5
				1	0.95	40
				1	0.95	40.5
				1	0.95	41
				1	0.95	41.5
				1	0.95	42
				1	0.95	42.5
				1	0.95	43
				1	0.95	43.5
				1	0.95	44
				1	0.95	44.5
				1	0.95	45
				1	0.95	45.5
				1	0.95	46
				1	0.95	46.5
				1	0.95	47
				1	0.95	47.5
				1	0.95	48
				1	0.95	48.5
				1	0.95	49
				1	0.95	49.5
				1	0.95	50
				1	0.95	50.5
				1	0.95	51
				1	0.95	51.5
				1	0.95	52
				1	0.95	52.5
				1	0.95	53
				1	0.95	53.5
				1	0.95	54
				1	0.95	54.5
				1	0.95	55
				1	0.95	55.5
				1	0.95	56
				1	0.95	56.5
				1	0.95	57
				1	0.95	57.5
				1	0.95	58
				1	0.95	58.5
				1	0.95	59
				1	1	59.5
				1	1	60
				1	1	60.5
				1	1	61
				1	1	61.5
				1	1	62
				1	1	62.5
				1	1	63
				1	1	63.5
				1	1	64
				1	1	64.5
				1	1	65
				1	1	65.5
				1	1	66
				1	1	66.5
				1	1	67
				1	1	67.5
				1	1	68
				1	1	68.5
				1	1	69
				1	1	69.5
				1	1	70
				1	1	70.5
				1	1	71
				1	1	71.5
				1	1	72
				1	1	72.5
				1	1	73
				1	1	73.5
				1	1	74
				1	1	74.5
				1	1	75
				1	1	75.5
				1	1	76
				1	1	76.5
				1	1	77
				1	1	77.5
				1	1	78
				1	1	78.5
				1	1	79
				1	1	79.5
				1	1	80
				1	1	80.5
				1	1	81
				1	1	81.5
				1	1	82
				1	1	82.5
				1	1	83
				1	1	83.5
				1	1	84
				1	1	84.5
				1	1	85
				1	1	85.5
				1	1	86
				1	1	86.5
				1	1	87
				1	1	87.5
				1	1	88
				1	1	88.5
				1	1	89
				1	1	89.5
				1	1	90
				1	1	90.5
				1	1	91
				1	1	91.5
				1	1	92
				1	1	92.5
				1	1	93
				1	1	93.5
				1	1	94
				1	1	94.5
				1	1	95
				1	1	95.5
				1	1	96
				1	1	96.5
				1	1	97
				1	1	97.5
				1	1	98
				1	1	98.5
				1	1	99
				1	1	99.5
				1	1	100
				1	1	100.5
				1	1	101
				1	1	101.5
				1	1	102
				1	1	102.5
				1	1	103
				1	1	103.5
				1	1	104
				1	1	104.5
				1	1	105
				1	1	105.5
				1	1	106
				1	1	106.5
				1	1	107
				1	1	107.5
				1	1	108
				1	1	108.5
				1	1	109
				1	1	109.5
				1	1	110
				1	1	110.5
				1	1	111
				1	1	111.5
				1	1	112
				1	1	112.5
				1	1	113
				1	1	113.5
				1	1	114
				1	1	114.5
				1	1	115
				1	1	115.5
				1	1	116
				1	1	116.5
				1	1	117
				1	1	117.5
				1	1	118
				1	1	118.5
				1	1	119
				1	1	119.5
				1	1	120
