# Supplementary material for: Feeding state functionally reconfigures a sensory circuit to drive thermosensory behavioral plasticity
Source: eLife. 2020 Oct 19;9:e61167. doi: 10.7554/eLife.61167 (PMC7644224; doi:10.7554/eLife.61167)
Supplement: Figure 3—figure supplement 1—source data 1. [file elife-61167-fig3-figsupp1-data1.xlsx]

## Sheet: Sheet1
Panel A								Panel B								Panel C						Panel D			Panel E						Panel F
	AIB			time	wtfed	wt-stv		Histogram	AIA			Cumsum				AIA-rising temp			20ºC			AIZ			N2_st	N2_st_NGM		AIAunc-103g/f_fed	AIAunc-103g/f_st		N2_NGM	N2_histamine		AIZ_hiscl_NGM	AIZ_hiscl_Histamine
frame (2Hz)	wt-fed	wt-stv		0	0.5	0.4348			wt-fed	wt-stv		fed	stv	time		wt-fed	wt-stv		fed	stv		wt-fed	wt-stv		0.10386	-0.10458		0.01743	-0.045361		0.95	0.95		0.85	0.35
1 to 30	0.2	0.1304		0.5	0.5	0.4348		1 to 30	0.6	0.5		0.2	0.3	0		2.92857	0		5.1429	0		13.7143	0		0.31208	-0.0051635		0.07053	0.11201		1.5	0.95		0.75	0.4
31 to60	0.3	0.3478		1	0.5	0.5217		31 to60	0.7	0.5		0.2	0.3	0.5		2.5	0		4.8462	4.9063		5.5	0		0.36488	-0.097353		0.060047	-0.04249		0.35	1.1		0.3	0.1
61 to 90	0.2	0.3043		1.5	0.5	0.5217		61 to 90	0.6	0.6		0.2	0.3	1		0	1.16667		5.8571	2		2.65	2.66667		0.28445	0.14452		-0.01559	0.045057		0.95	0.5		0.75	0.2
91 to 120	0.2	0.2174		2	0.5	0.5217		91 to 120	0.5	0.6		0.2	0.3	1.5		2.5	0		2.5833	5.6071		6.625	1.21429		0.32503	-0.03727		0.06257	0.31606		0.6	0.75		0.45	0.3
121 to 150	0.15	0.2174		2.5	0.55	0.5652		121 to 150	0.4	0.5		0.3	0.3	2		1.86765	0		0	0.8125		0	0		0.32844	-0.16063		0.1654	0.022702		0.55	0.6		0.6	0.45
151 to 180	0.1	0.2174		3	0.6	0.6087		151 to 180	0.6	0.5		0.3	0.3	2.5		4.77778	0		2.0333	1.5323		0	0		0.34359	0.043491		-0.09053	-0.036102		0.55	1		0.7	0.2
181 to 210	0.15	0.1739		3.5	0.6	0.6522		181 to 210	0.6	0.6		0.3	0.3	3		0	0		1.9444	1.6429		3.31818	7.95833		0.33098	0.1827					0.65	0.7		0.75	0.35
211 to 240	0.2	0.087		4	0.65	0.6522		211 to 240	0.6	0.5		0.3	0.3	3.5		1.56667	0		0	1.7368		0	0.5		0.39733	0.015887					0.6	1.45		0.65	0.15
241 to 270	0.15	0		4.5	0.65	0.6522						0.3	0.3	4		4.125	0		8	0		0	0.5		0.28195	-0.06445					1.15	0.95		1.3	0.15
271 to 301	0.1	0.0435		5	0.65	0.6522						0.3	0.3	4.5		3.5	4.5		2	0		1.77778	0		0.33205	0.32703					1.3	1.05		0.95	0.4
				5.5	0.65	0.6522						0.3	0.3	5		0	0					5.73333	0			-0.09471					0.9	0.75		0.25	0.1
				6	0.65	0.6522						0.3	0.3	5.5		3.72727	3.6					0.5	1.5								1	0.65		0.8	0.05
				6.5	0.65	0.6957						0.3	0.3	6		1.77778	4.33333					11	0								0.7	0.7		0.25	0.35
				7	0.7	0.6957						0.3	0.4	6.5		1.5	0					0	0								0.9	0.9		0.5	0
				7.5	0.7	0.6957						0.3	0.4	7		5.63636	0					0	1.40909								0.7	0.7		0.9	0.05
				8	0.7	0.6957						0.3	0.4	7.5		2.80769	3.625					0	0								1.2	1.2		0.45	0.45
				8.5	0.7	0.6957						0.3	0.4	8		3.33333	0					7.5	0.5								0.15	0.15		0.95	0.25
				9	0.7	0.6957						0.3	0.4	8.5		3.5	0					3.325	1.75								0.45	0.45		1.25	0.3
				9.5	0.7	0.6957						0.3	0.4	9		5.08333	0					0.5	0								0.65	0.65		0.55	0.1
				10	0.7	0.6957						0.3	0.4	9.5		2.97222	0					0	0								1.15	1.15
				10.5	0.7	0.6957						0.3	0.5	10		2.35714	0					1.94118	1.4
				11	0.7	0.6957						0.3	0.5	10.5								4.27273	1.5
				11.5	0.7	0.7391						0.3	0.5	11								5.73077	0
				12	0.7	0.7391						0.3	0.6	11.5								4.5	0
				12.5	0.7	0.7391						0.3	0.6	12								0	0
				13	0.7	0.7391						0.3	0.6	12.5								1	4.6875
				13.5	0.7	0.7391						0.3	0.6	13								3.06667
				14	0.75	0.7391						0.3	0.6	13.5								19.5
				14.5	0.75	0.7391						0.3	0.6	14								0
				15	0.75	0.7391						0.3	0.6	14.5
				15.5	0.8	0.7391						0.3	0.6	15
				16	0.8	0.7391						0.3	0.6	15.5
				16.5	0.8	0.7391						0.3	0.6	16
				17	0.8	0.7391						0.3	0.6	16.5
				17.5	0.8	0.7391						0.3	0.6	17
				18	0.8	0.7826						0.4	0.6	17.5
				18.5	0.8	0.7826						0.4	0.6	18
				19	0.8	0.7826						0.4	0.6	18.5
				19.5	0.8	0.7826						0.4	0.6	19
				20	0.8	0.7826						0.4	0.6	19.5
				20.5	0.8	0.7826						0.4	0.6	20
				21	0.8	0.7826						0.4	0.6	20.5
				21.5	0.8	0.7826						0.4	0.6	21
				22	0.8	0.7826						0.4	0.6	21.5
				22.5	0.8	0.7826						0.4	0.6	22
				23	0.8	0.7826						0.4	0.6	22.5
				23.5	0.8	0.8261						0.4	0.6	23
				24	0.8	0.8261						0.4	0.6	23.5
				24.5	0.8	0.8261						0.4	0.6	24
				25	0.8	0.8261						0.4	0.6	24.5
				25.5	0.8	0.8261						0.4	0.6	25
				26	0.8	0.8261						0.4	0.6	25.5
				26.5	0.8	0.8696						0.4	0.6	26
				27	0.8	0.8696						0.4	0.6	26.5
				27.5	0.8	0.8696						0.4	0.6	27
				28	0.8	0.913						0.4	0.6	27.5
				28.5	0.8	0.913						0.4	0.6	28
				29	0.8	0.913						0.4	0.6	28.5
				29.5	0.8	0.913						0.4	0.6	29
				30	0.8	0.913						0.4	0.6	29.5
				30.5	0.8	0.913						0.4	0.6	30
				31	0.8	0.913						0.5	0.6	30.5
				31.5	0.8	0.913						0.5	0.6	31
				32	0.8	0.913						0.5	0.6	31.5
				32.5	0.8	0.913						0.5	0.6	32
				33	0.85	0.913						0.5	0.6	32.5
				33.5	0.9	0.913						0.5	0.7	33
				34	0.9	0.913						0.5	0.7	33.5
				34.5	0.9	0.913						0.5	0.7	34
				35	0.9	0.913						0.5	0.7	34.5
				35.5	0.9	0.913						0.5	0.7	35
				36	0.9	0.913						0.5	0.7	35.5
				36.5	0.9	0.913						0.6	0.7	36
				37	0.9	0.913						0.6	0.7	36.5
				37.5	0.9	0.913						0.6	0.7	37
				38	0.9	0.913						0.6	0.7	37.5
				38.5	0.9	0.913						0.6	0.7	38
				39	0.9	0.913						0.6	0.7	38.5
				39.5	0.9	0.913						0.6	0.7	39
				40	0.9	0.913						0.6	0.7	39.5
				40.5	0.9	0.913						0.6	0.7	40
				41	0.9	0.913						0.6	0.7	40.5
				41.5	0.9	0.913						0.7	0.7	41
				42	0.9	0.913						0.7	0.7	41.5
				42.5	0.9	0.913						0.7	0.7	42
				43	0.9	0.913						0.7	0.7	42.5
				43.5	0.9	0.913						0.7	0.7	43
				44	0.9	0.913						0.7	0.7	43.5
				44.5	0.9	0.913						0.7	0.7	44
				45	0.9	0.913						0.7	0.7	44.5
				45.5	0.9	0.913						0.7	0.7	45
				46	0.9	0.913						0.7	0.7	45.5
				46.5	0.9	0.913						0.7	0.7	46
				47	0.9	0.913						0.7	0.7	46.5
				47.5	0.9	0.913						0.7	0.7	47
				48	0.9	0.913						0.7	0.8	47.5
				48.5	0.9	0.913						0.7	0.8	48
				49	0.9	0.9565						0.7	0.8	48.5
				49.5	0.9	0.9565						0.7	0.8	49
				50	0.9	0.9565						0.7	0.8	49.5
				50.5	0.9	0.9565						0.7	0.8	50
				51	0.9	0.9565						0.7	0.8	50.5
				51.5	0.9	0.9565						0.7	0.8	51
				52	0.9	0.9565						0.7	0.8	51.5
				52.5	0.9	0.9565						0.7	0.8	52
				53	0.9	0.9565						0.7	0.8	52.5
				53.5	0.9	0.9565						0.7	0.8	53
				54	0.9	0.9565						0.7	0.8	53.5
				54.5	0.9	0.9565						0.7	0.8	54
				55	0.9	0.9565						0.7	0.8	54.5
				55.5	0.9	0.9565						0.7	0.8	55
				56	0.9	0.9565						0.7	0.8	55.5
				56.5	0.9	0.9565						0.7	0.8	56
				57	0.9	0.9565						0.7	0.8	56.5
				57.5	0.9	0.9565						0.7	0.8	57
				58	0.9	0.9565						0.7	0.8	57.5
				58.5	0.9	0.9565						0.7	0.8	58
				59	0.95	0.9565						0.7	0.8	58.5
				59.5	0.95	0.9565						0.7	0.8	59
				60	0.95	0.9565						0.7	0.8	59.5
				60.5	0.95	0.9565						0.7	0.8	60
				61	0.95	0.9565						0.7	0.8	60.5
				61.5	0.95	0.9565						0.7	0.8	61
				62	0.95	0.9565						0.7	0.8	61.5
				62.5	0.95	0.9565						0.8	0.8	62
				63	0.95	0.9565						0.8	0.8	62.5
				63.5	0.95	0.9565						0.9	0.8	63
				64	0.95	0.9565						0.9	0.8	63.5
				64.5	0.95	0.9565						0.9	0.8	64
				65	0.95	0.9565						0.9	0.8	64.5
				65.5	0.95	0.9565						0.9	0.8	65
				66	0.95	0.9565						0.9	0.8	65.5
				66.5	0.95	0.9565						0.9	0.8	66
				67	0.95	0.9565						0.9	0.8	66.5
				67.5	0.95	0.9565						0.9	0.8	67
				68	0.95	0.9565						0.9	0.8	67.5
				68.5	0.95	0.9565						0.9	0.8	68
				69	0.95	0.9565						0.9	0.8	68.5
				69.5	0.95	0.9565						0.9	0.8	69
				70	0.95	0.9565						0.9	0.8	69.5
				70.5	0.95	0.9565						0.9	0.8	70
				71	0.95	0.9565						0.9	0.8	70.5
				71.5	0.95	0.9565						0.9	0.8	71
				72	0.95	0.9565						0.9	0.8	71.5
				72.5	0.95	0.9565						0.9	0.8	72
				73	0.95	0.9565						0.9	0.8	72.5
				73.5	0.95	0.9565						0.9	0.8	73
				74	0.95	0.9565						0.9	0.8	73.5
				74.5	0.95	0.9565						0.9	0.8	74
				75	0.95	0.9565						0.9	0.8	74.5
				75.5	0.95	0.9565						0.9	0.8	75
				76	0.95	0.9565						0.9	0.8	75.5
				76.5	0.95	0.9565						0.9	0.8	76
				77	0.95	0.9565						0.9	0.8	76.5
				77.5	0.95	0.9565						0.9	0.8	77
				78	0.95	0.9565						0.9	0.8	77.5
				78.5	0.95	0.9565						0.9	0.8	78
				79	0.95	0.9565						0.9	1	78.5
				79.5	0.95	0.9565						0.9	1	79
				80	0.95	0.9565						0.9	1	79.5
				80.5	0.95	0.9565						0.9	1	80
				81	0.95	0.9565						0.9	1	80.5
				81.5	0.95	0.9565						0.9	1	81
				82	0.95	0.9565						0.9	1	81.5
				82.5	0.95	0.9565						0.9	1	82
				83	0.95	0.9565						0.9	1	82.5
				83.5	0.95	0.9565						0.9	1	83
				84	0.95	0.9565						0.9	1	83.5
				84.5	0.95	0.9565						0.9	1	84
				85	0.95	0.9565						0.9	1	84.5
				85.5	0.95	0.9565						0.9	1	85
				86	0.95	1						0.9	1	85.5
				86.5	0.95	1						0.9	1	86
				87	0.95	1						0.9	1	86.5
				87.5	0.95	1						0.9	1	87
				88	0.95	1						0.9	1	87.5
				88.5	0.95	1						1	1	88
				89	0.95	1						1	1	88.5
				89.5	0.95	1						1	1	89
				90	0.95	1						1	1	89.5
				90.5	0.95	1						1	1	90
				91	0.95	1						1	1	90.5
				91.5	0.95	1						1	1	91
				92	0.95	1						1	1	91.5
				92.5	0.95	1						1	1	92
				93	0.95	1						1	1	92.5
				93.5	0.95	1						1	1	93
				94	0.95	1						1	1	93.5
				94.5	0.95	1						1	1	94
				95	1	1						1	1	94.5
				95.5	1	1						1	1	95
				96	1	1						1	1	95.5
				96.5	1	1						1	1	96
				97	1	1						1	1	96.5
				97.5	1	1						1	1	97
				98	1	1						1	1	97.5
				98.5	1	1						1	1	98
				99	1	1						1	1	98.5
				99.5	1	1						1	1	99
				100	1	1						1	1	99.5
												1	1	100
