# Supplementary material for: Feeding state functionally reconfigures a sensory circuit to drive thermosensory behavioral plasticity
Source: eLife. 2020 Oct 19;9:e61167. doi: 10.7554/eLife.61167 (PMC7644224; doi:10.7554/eLife.61167)
Supplement: Figure 3—source data 1. [file elife-61167-fig3-data1.xlsx]

## Sheet: Fig 3B
		AIA
frame (2Hz)		wt-fed	wt-stv
1 to 30		0.4762	0.0952
31 to60		0.5714	0.0476
61 to 90		0.5714	0.0952
91 to 120		0.619	0.0476
121 to 150		0.6667	0.1429
151 to 180		0.5714	0.1429
181 to 210		0.4762	0.1905
211 to 240		0.4762	0.1429
241 to 270		0.4286	0.1429
271 to 301		0.5714	0.0952

## Sheet: Fig 3C
wtfed	wt-stv		time
0.1429	0.7619		0
0.1429	0.7619		0.5
0.1429	0.7619		1
0.1429	0.7619		1.5
0.1429	0.7619		2
0.1429	0.7619		2.5
0.1429	0.7619		3
0.1905	0.7619		3.5
0.2381	0.7619		4
0.2381	0.7619		4.5
0.2381	0.8095		5
0.2381	0.8095		5.5
0.2381	0.8095		6
0.2381	0.8095		6.5
0.2381	0.8095		7
0.2381	0.8571		7.5
0.2857	0.8571		8
0.2857	0.8571		8.5
0.2857	0.8571		9
0.2857	0.8571		9.5
0.2857	0.8571		10
0.3333	0.8571		10.5
0.3333	0.8571		11
0.3333	0.8571		11.5
0.3333	0.8571		12
0.3333	0.8571		12.5
0.3333	0.8571		13
0.3333	0.8571		13.5
0.3333	0.8571		14
0.3333	0.8571		14.5
0.3333	0.8571		15
0.3333	0.8571		15.5
0.3333	0.8571		16
0.3333	0.8571		16.5
0.4286	0.8571		17
0.4286	0.8571		17.5
0.4286	0.8571		18
0.4286	0.8571		18.5
0.4286	0.8571		19
0.4286	0.8571		19.5
0.4286	0.8571		20
0.4762	0.8571		20.5
0.4762	0.8571		21
0.4762	0.8571		21.5
0.4762	0.8571		22
0.4762	0.8571		22.5
0.4762	0.8571		23
0.4762	0.8571		23.5
0.5238	0.8571		24
0.5238	0.8571		24.5
0.5238	0.8571		25
0.5238	0.8571		25.5
0.5238	0.8571		26
0.5238	0.8571		26.5
0.5238	0.8571		27
0.5238	0.8571		27.5
0.5238	0.8571		28
0.5238	0.8571		28.5
0.5238	0.8571		29
0.5238	0.9048		29.5
0.5238	0.9048		30
0.5238	0.9048		30.5
0.5238	0.9048		31
0.5238	0.9048		31.5
0.5238	0.9048		32
0.5714	0.9048		32.5
0.5714	0.9048		33
0.5714	0.9048		33.5
0.5714	0.9048		34
0.5714	0.9048		34.5
0.5714	0.9048		35
0.5714	0.9048		35.5
0.5714	0.9048		36
0.5714	0.9048		36.5
0.619	0.9048		37
0.619	0.9048		37.5
0.619	0.9048		38
0.619	0.9048		38.5
0.6667	0.9048		39
0.6667	0.9524		39.5
0.6667	0.9524		40
0.6667	0.9524		40.5
0.6667	0.9524		41
0.7143	0.9524		41.5
0.7143	0.9524		42
0.7143	0.9524		42.5
0.7143	0.9524		43
0.7143	0.9524		43.5
0.7143	0.9524		44
0.7143	0.9524		44.5
0.7143	0.9524		45
0.7143	0.9524		45.5
0.7143	0.9524		46
0.7143	0.9524		46.5
0.7143	0.9524		47
0.7143	0.9524		47.5
0.7143	0.9524		48
0.7143	0.9524		48.5
0.7143	0.9524		49
0.7143	0.9524		49.5
0.7143	0.9524		50
0.7143	0.9524		50.5
0.7143	0.9524		51
0.7143	0.9524		51.5
0.7143	0.9524		52
0.7143	0.9524		52.5
0.7143	0.9524		53
0.7143	0.9524		53.5
0.7619	0.9524		54
0.7619	1		54.5
0.7619	1		55
0.7619	1		55.5
0.7619	1		56
0.7619	1		56.5
0.7619	1		57
0.7619	1		57.5
0.7619	1		58
0.7619	1		58.5
0.7619	1		59
0.7619	1		59.5
0.7619	1		60
0.7619	1		60.5
0.7619	1		61
0.8095	1		61.5
0.8571	1		62
0.9048	1		62.5
0.9048	1		63
0.9048	1		63.5
0.9524	1		64
0.9524	1		64.5
0.9524	1		65
0.9524	1		65.5
0.9524	1		66
0.9524	1		66.5
0.9524	1		67
0.9524	1		67.5
0.9524	1		68
0.9524	1		68.5
0.9524	1		69
0.9524	1		69.5
0.9524	1		70
0.9524	1		70.5
0.9524	1		71
0.9524	1		71.5
0.9524	1		72
0.9524	1		72.5
0.9524	1		73
0.9524	1		73.5
0.9524	1		74
0.9524	1		74.5
0.9524	1		75
0.9524	1		75.5
0.9524	1		76
0.9524	1		76.5
0.9524	1		77
0.9524	1		77.5
0.9524	1		78
0.9524	1		78.5
0.9524	1		79
0.9524	1		79.5
0.9524	1		80
0.9524	1		80.5
0.9524	1		81
0.9524	1		81.5
0.9524	1		82
0.9524	1		82.5
0.9524	1		83
0.9524	1		83.5
0.9524	1		84
0.9524	1		84.5
0.9524	1		85
0.9524	1		85.5
0.9524	1		86
1	1		86.5
1	1		87
1	1		87.5
1	1		88
1	1		88.5
1	1		89
1	1		89.5
1	1		90
1	1		90.5
1	1		91
1	1		91.5
1	1		92
1	1		92.5
1	1		93
1	1		93.5
1	1		94
1	1		94.5
1	1		95
1	1		95.5
1	1		96
1	1		96.5
1	1		97
1	1		97.5
1	1		98
1	1		98.5
1	1		99
1	1		99.5
1	1		100

## Sheet: Fig 3D
		AIZ
frame (2Hz)		wt-fed	wt-stv
1 to 30		0.2759	0.1538
31 to60		0.4483	0.1154
61 to 90		0.5172	0.1923
91 to 120		0.4828	0.2308
121 to 150		0.4483	0.1923
151 to 180		0.3448	0.1923
181 to 210		0.3448	0.1538
211 to 240		0.3448	0.0769
241 to 270		0.3793	0.1154
271 to 301		0.3448	0.1154

## Sheet: Fig 3E
AIZ
wtfed	wt-stv		time
0.3448	0.5385		0
0.3448	0.5385		0.5
0.3448	0.6538		1
0.3448	0.6538		1.5
0.3793	0.6538		2
0.4138	0.6538		2.5
0.4138	0.6538		3
0.4138	0.6538		3.5
0.4138	0.6538		4
0.4138	0.6538		4.5
0.4138	0.6538		5
0.4138	0.6538		5.5
0.4138	0.6538		6
0.4138	0.6923		6.5
0.4138	0.6923		7
0.4138	0.6923		7.5
0.4138	0.6923		8
0.4138	0.6923		8.5
0.4138	0.7308		9
0.4483	0.7308		9.5
0.4483	0.7308		10
0.4483	0.7308		10.5
0.4483	0.7308		11
0.4483	0.7308		11.5
0.4483	0.7308		12
0.4483	0.7692		12.5
0.4483	0.7692		13
0.4483	0.7692		13.5
0.4483	0.7692		14
0.4483	0.8462		14.5
0.4483	0.8462		15
0.4483	0.8462		15.5
0.4483	0.8846		16
0.4828	0.9231		16.5
0.5172	0.9231		17
0.5172	0.9231		17.5
0.5172	0.9231		18
0.5172	0.9231		18.5
0.5172	0.9231		19
0.5172	0.9231		19.5
0.5172	0.9231		20
0.5172	0.9231		20.5
0.5172	0.9231		21
0.5172	0.9231		21.5
0.5172	0.9231		22
0.5172	0.9231		22.5
0.5172	0.9231		23
0.5172	0.9231		23.5
0.5172	0.9231		24
0.5172	0.9231		24.5
0.5172	0.9231		25
0.5172	0.9231		25.5
0.5172	0.9231		26
0.5172	0.9231		26.5
0.5517	0.9231		27
0.5517	0.9231		27.5
0.5517	0.9231		28
0.5517	0.9231		28.5
0.5517	0.9231		29
0.5517	0.9231		29.5
0.5517	0.9231		30
0.5517	0.9231		30.5
0.5517	0.9231		31
0.5517	0.9231		31.5
0.5862	0.9231		32
0.5862	0.9231		32.5
0.5862	0.9231		33
0.6552	0.9231		33.5
0.6552	0.9231		34
0.6552	0.9231		34.5
0.6552	0.9231		35
0.6552	0.9231		35.5
0.6552	0.9231		36
0.6552	0.9231		36.5
0.6897	0.9231		37
0.6897	0.9231		37.5
0.6897	0.9615		38
0.6897	0.9615		38.5
0.6897	0.9615		39
0.7241	0.9615		39.5
0.7241	0.9615		40
0.7241	0.9615		40.5
0.7241	0.9615		41
0.7241	0.9615		41.5
0.7241	0.9615		42
0.7241	0.9615		42.5
0.7241	0.9615		43
0.7241	0.9615		43.5
0.7241	0.9615		44
0.7241	0.9615		44.5
0.7241	0.9615		45
0.7241	0.9615		45.5
0.7241	0.9615		46
0.7586	0.9615		46.5
0.7586	0.9615		47
0.7931	0.9615		47.5
0.7931	0.9615		48
0.7931	0.9615		48.5
0.7931	0.9615		49
0.7931	0.9615		49.5
0.7931	0.9615		50
0.7931	0.9615		50.5
0.7931	0.9615		51
0.7931	0.9615		51.5
0.7931	0.9615		52
0.7931	0.9615		52.5
0.7931	0.9615		53
0.8276	0.9615		53.5
0.8276	0.9615		54
0.8276	0.9615		54.5
0.8276	0.9615		55
0.8276	0.9615		55.5
0.8276	0.9615		56
0.8276	0.9615		56.5
0.8276	0.9615		57
0.8276	0.9615		57.5
0.8276	0.9615		58
0.8276	0.9615		58.5
0.8276	0.9615		59
0.8276	0.9615		59.5
0.8276	0.9615		60
0.8276	0.9615		60.5
0.8276	0.9615		61
0.8276	0.9615		61.5
0.8276	0.9615		62
0.8276	0.9615		62.5
0.8276	0.9615		63
0.8276	0.9615		63.5
0.8276	0.9615		64
0.8276	0.9615		64.5
0.8276	0.9615		65
0.8276	0.9615		65.5
0.8276	0.9615		66
0.8276	0.9615		66.5
0.8621	0.9615		67
0.8621	0.9615		67.5
0.8621	0.9615		68
0.8621	0.9615		68.5
0.8621	0.9615		69
0.8621	0.9615		69.5
0.8621	0.9615		70
0.8621	0.9615		70.5
0.8621	0.9615		71
0.8621	0.9615		71.5
0.8621	0.9615		72
0.8621	0.9615		72.5
0.8621	0.9615		73
0.8621	0.9615		73.5
0.8621	0.9615		74
0.8621	0.9615		74.5
0.8966	0.9615		75
0.8966	0.9615		75.5
0.8966	0.9615		76
0.8966	0.9615		76.5
0.8966	0.9615		77
0.8966	0.9615		77.5
0.8966	0.9615		78
0.8966	0.9615		78.5
0.8966	0.9615		79
0.8966	0.9615		79.5
0.8966	0.9615		80
0.8966	0.9615		80.5
0.8966	0.9615		81
0.8966	0.9615		81.5
0.8966	0.9615		82
0.8966	0.9615		82.5
0.8966	0.9615		83
0.8966	0.9615		83.5
0.8966	0.9615		84
0.8966	0.9615		84.5
0.8966	0.9615		85
0.8966	0.9615		85.5
0.8966	0.9615		86
0.931	0.9615		86.5
0.931	0.9615		87
0.931	0.9615		87.5
0.931	0.9615		88
0.931	0.9615		88.5
0.931	0.9615		89
0.931	0.9615		89.5
0.931	0.9615		90
0.931	0.9615		90.5
0.931	0.9615		91
0.931	0.9615		91.5
0.931	0.9615		92
0.931	0.9615		92.5
0.931	0.9615		93
0.931	0.9615		93.5
0.931	0.9615		94
0.931	0.9615		94.5
0.931	0.9615		95
0.931	0.9615		95.5
0.931	1		96
0.9655	1		96.5
0.9655	1		97
0.9655	1		97.5
0.9655	1		98
0.9655	1		98.5
0.9655	1		99
0.9655	1		99.5
0.9655	1		100
0.9655	1		100.5
0.9655	1		101
0.9655	1		101.5
0.9655	1		102
0.9655	1		102.5
0.9655	1		103
0.9655	1		103.5
0.9655	1		104
0.9655	1		104.5
0.9655	1		105
1	1		105.5
1	1		106
1	1		106.5
1	1		107
1	1		107.5
1	1		108
1	1		108.5
1	1		109
1	1		109.5
1	1		110
1	1		110.5
1	1		111
1	1		111.5
1	1		112
1	1		112.5
1	1		113
1	1		113.5
1	1		114
1	1		114.5
1	1		115
1	1		115.5
1	1		116
1	1		116.5
1	1		117
1	1		117.5
1	1		118
1	1		118.5
1	1		119
1	1		119.5
1	1		120
1	1		120.5
1	1		121
1	1		121.5
1	1		122
1	1		122.5
1	1		123
1	1		123.5
1	1		124
1	1		124.5
1	1		125
1	1		125.5
1	1		126
1	1		126.5
1	1		127
1	1		127.5
1	1		128
1	1		128.5
1	1		129
1	1		129.5
1	1		130
1	1		130.5
1	1		131
1	1		131.5
1	1		132
1	1		132.5
1	1		133
1	1		133.5
1	1		134
1	1		134.5
1	1		135
1	1		135.5
1	1		136
1	1		136.5
1	1		137
1	1		137.5
1	1		138
1	1		138.5
1	1		139
1	1		139.5
1	1		140
1	1		140.5
1	1		141
1	1		141.5
1	1		142
1	1		142.5
1	1		143
1	1		143.5
1	1		144
1	1		144.5
1	1		145
1	1		145.5
1	1		146
1	1		146.5
1	1		147
1	1		147.5
1	1		148
1	1		148.5
1	1		149
1	1		149.5
1	1		150

## Sheet: Fig 3F
N2_fed_NGM	N2_st_NGM		N2_fed_Histamine	N2_st_Histamine		AIA_hiscl_fed_NGM	AIA_hiscl_st_NGM		AIA_hiscl_fed_histamine	AIA_hiscl_st_histamine
0.10386	-0.10458		0.45165	-0.08551		0.19221	0.04144		-0.0099068	-0.060677
0.31208	-0.00516		0.16512	-0.07309		0.17138	0.15918		-0.092039	0.10609
0.36488	-0.09735		0.24957	0.084451		0.27481	0.082723		0.22324	-0.11565
0.28445	0.06718		0.31171	0.072264		0.19203	-0.026951		0.11392	-0.11554
0.2844	0.1127		0.37879	0.17875		0.29585	-0.0599		0.028013	-0.091275
0.4638	0.096		0.41337	0.00179		0.13186	0.028594		-0.12729	0.21745
0.2875	0.05122		0.37374	0.094941		0.25028	0.050171		-0.055286	0.31347
0.2823	0.02753		0.45982	0.139241		0.15065	0.05449
0.1927	0.10583		0.3846	0.1139		0.204
0.39423	0.08972		0.2998	0.09712		0.28991
0.32703	-0.09471		0.3842	0.1202		0.20305
						0.20528

## Sheet: Fig 3G
N2_fed_NGM	N2_st_NGM		N2_fed_histamine	N2_st_histamine		AIZ_hiscl_fed_NGM	AIZ_hiscl_st_NGM		AIZ_hiscl_fed_Histamine	AIZ_hiscl_st_histamine
0.10386	-0.10458		0.45165	-0.08551		0.25961	0.016793		0.5107	0.040945
0.31208	-0.00516		0.16512	-0.07309		0.18567	0.11539		0.57583	0.047826
0.36488	-0.09735		0.24957	0.084451		0.23789	0.007099		0.44428	0.17273
0.28445	0.06718		0.31171	0.072264		0.41452	0.12727		0.40351	0.20644
0.32703	0.1127		0.37879	0.17875		0.14068	0.098808		0.16615	0.11794
0.2844	0.096		0.41337	0.00179		0.41258	0.042991		0.17798	0.14093
0.4638	0.05122		0.37374	0.094941		0.36601	0.13138		0.24331	0.15211
0.2875	0.02753		0.45982	0.139241		0.27062
0.2823	0.10583		0.3846	0.1139
0.1927	0.08972		0.2998	0.09712
0.39423	-0.09471		0.3842	0.1202

## Sheet: Fig 3H
N2_fed_NGM	N2_st_NGM		N2_fed_ATR	N2_st_ATR		ins-1(s)p::ChR_fed_NGM	ins-1(s)p::ChR_st_NGM		ins-1(s)p::ChR_fed_ATR	ins-1(s)p::ChR_st_ATR
0.32	0.05		0.57	-0.17		0.15	0.0769		0.75	0.5
0.29	0.11		0.3	-0.05		0.43	0.071		0.5	0.3
0.45	0.08		0.38	0.2		0.33	0.08		0.7	0.4
0.39	0.058		0.21	0.14		0.07	0.09		0.61	0.53
0.38	0.12		0.5	0.12		0.5	0.08		0.33	0.5
0.49	-0.04		0.65	0.08		0.38	-0.17		0.545455	0.23
0.24	0.1		0.48	0.04		0.44	0.12		0.5	0.17

## Sheet: Fig 3I
N2_fed	N2_st		AWC_eat-4 KO_fed	AWC_eat-4 KO_st
0.10386	-0.10458		0.126941	0.56805
0.31208	-0.0051635		0.021063	-0.06206
0.36488	-0.097353		0.17738	0.095652
0.28445	0.14452		0.36413	0.067775
0.32503	-0.03727		0.014903	0.49743
0.32844	-0.16063		0.19819	0.27506
0.34359	0.043491		0.160719	0.47489
0.33098	0.1827		0.28185	0.28185
0.39733	0.015887		0.20908	0.63577
0.28195	-0.06445		0.16327	0.41352
0.33205	0.32703			0.35586
	-0.09471
