# Supplementary material for: Feeding state functionally reconfigures a sensory circuit to drive thermosensory behavioral plasticity
Source: eLife. 2020 Oct 19;9:e61167. doi: 10.7554/eLife.61167 (PMC7644224; doi:10.7554/eLife.61167)
Supplement: Figure 4—figure supplement 1—source data 1. [file elife-61167-fig4-figsupp1-data1.xlsx]

## Sheet: Sheet1
Panel C
Fed					Stv
signal	back	intensity			Signal	back	intensity
333.147	242.321	90.826			332.364	265.691	66.673
323.764	259.07	64.694			304.337	221.461	82.876
332.345	247.81	84.535			342.41	279.351	63.059
320.96	241.574	79.386			330.936	295.155	35.781
326.464	266.642	59.822			346.52	242.048	104.472
318.087	221.892	96.195			354.006	266.291	87.715
360.698	298.988	61.71			354.066	282.619	71.447
344.556	256.718	87.838			349.748	269.835	79.913
295.784	237.686	58.098			334.461	240.421	94.04
272.008	210.923	61.085			353.948	262.982	90.966
365.637	302.203	63.434			303.77	244.247	59.523
352.082	279.666	72.416			369.088	254.508	114.58
373.137	275.81	97.327			356.777	287.238	69.539
348.299	285.962	62.337			370.129	265.25	104.879
357.99	270.472	87.518			306.373	222.076	84.297
368.894	289.468	79.426			367.158	263.44	103.718
390.601	310.865	79.736			343.791	235.584	108.207
397.358	326.356	71.002			316.699	241.68	75.019
381.515	291.515	90			310.916	226.43	84.486
373.831	288.152	85.679			374.035	266.879	107.156
148.626	72.552	76.074			353.51	297.988	55.522
190.341	79.424	110.917			347.073	275.869	71.204
149.016	75.764	73.252			161.502	70.003	91.499
200.282	79.903	120.379			160.852	66.125	94.727
154.473	66.159	88.314			158.655	72.581	86.074
136.041	67.144	68.897			175.596	73.382	102.214
146.29	62.659	83.631			174.791	76.771	98.02
150.802	70.218	80.584			152.099	71.933	80.166
192.338	65.099	127.239			153.031	72.79	80.241
144.68	59.607	85.073			171.556	74.272	97.284
134.681	60.078	74.603			161.665	63.449	98.216
152.644	61.655	90.989			146.469	56.89	89.579
143.182	62.895	80.287			142.469	58.54	83.929
62.895	59.169	3.726			121.189	55.069	66.12
137.092	61.809	75.283			115.663	53.054	62.609
118.377	58.786	59.591			144.592	54.219	90.373
154.21	58.025	96.185			127.647	52.615	75.032
129.356	57.309	72.047			138.612	56.967	81.645
123.308	57.955	65.353			163.245	54.439	108.806
123.697	58.649	65.048			143.097	53.336	89.761
