# Supplementary material for: Feeding state functionally reconfigures a sensory circuit to drive thermosensory behavioral plasticity
Source: eLife. 2020 Oct 19;9:e61167. doi: 10.7554/eLife.61167 (PMC7644224; doi:10.7554/eLife.61167)
Supplement: Figure 4—figure supplement 2—source data 1. [file elife-61167-fig4-figsupp2-data1.xlsx]

## Sheet: Sheet1
Panel A												Panel C												Panel D																					Panel E
N2_fed	N2_St		age-1_fed	age-1_st		pdk-1_fed	pdk-1_st		akt-1_fed	akt-1_st		WT_NGM_fed	WT_NGM_st		WT_auxin_fed	WT_auxin_st		daf-16AID_ASItir1_NGM_fed	daf-16AID_ASItir1_NGM_st	e	daf-16AID_ASItir1_auxin_fed	daf-16AID_ASItir1_auxin_st		N2_fed	N2_st		nlp-1_fed	nlp1_st		npr-11_fed	npr-11_st		tph-1_fed	tph-1_st		gcy-28_fed	gcy-28_St		ins-32_fed	ins-32_st		ins-26/35_fed	ins-26/35_st		AWC
0.10386	-0.10458		0.2127	-0.09219		0.087363	-0.18668		0.13933	-0.0453		0.13556	0.16155		0.16192	0.04675		0.179	0.077818		0.39686	0.015831		0.10386	-0.10458		0.23289	0.0093933		0.33042	0.020125		0.4345	0.17386		0.19752	0.09371		0.28974	0.38506		0.37957	0.019487		wt-fed	wt-stv	ins1-fed	ins1-stv
0.31208	-0.0051635		0.31766	0.04344		-0.09028	0.029551		0.17092	0.028991		0.2091	0.085526		0.23543	0.03908		0.11526	0.1945		0.2041	-0.065185		0.31208	-0.0051635		0.36633	0.14889		0.46805	0.16681		0.44469	-0.04345		0.36713	0.098219		0.48744	0.23728		0.3571	0.22398		4.35714	35	29	0
0.36488	-0.097353		0.27596	0.058704		-0.02551	0.080771		0.14021	0.037856		0.36909	0.074069		0.45227	0.053961		0.42194	0.081365		0.013905	0.155578		0.36488	-0.097353		0.23092	0.10664		0.115837	-0.08094		0.56655	-0.26199		0.37336	0.067299		0.39592	-0.20845		0.36842	0.060583		10.75	25	0	25.25
0.28445	0.14452		0.22892	0.1399		-0.12969	-0.20694		0.20046	0.12891		0.22945	0.12461		0.198421	0.12917		0.233113	-0.045654		0.095057	0.026604		0.28445	0.14452		0.34257	0.17661		0.27947	0.083138		0.31931	-0.01915		0.22705	-0.06221		0.33446	0.19903		0.37417	0.14199		17.25	7.83333	0	0
0.32503	-0.03727		0.12291	-0.13688		-0.09396	0.12969		0.21978	-0.11384		0.14415	0.07727		0.22979	-0.13305		0.28258	-0.084112		0.326604	0.013699		0.32503	-0.03727		0.70254	0.090162		0.26636	0.053041		0.15615	0.068182		0.25116	-0.04417		0.40805	-0.23343		0.47721	-0.04352		33	82	0	0
0.32844	-0.16063		0.22707	-0.01064		-0.06837	-0.13834		0.30499	-0.06037		0.23857	0.023163		0.205729	0.047619		0.21604	0.14248		0.16988	-0.017608		0.32844	-0.16063		0.60374	0.15128		0.3148	0.068533		0.20489	-0.02377		0.244143	0.00758		0.52145	0.39036		0.38707	-0.047875		45.5	7.5	0	0
0.34359	0.043491		0.22134	0.069096		0.10725	-0.09904		0.21614	-0.20052		0.12372	0.11078		0.23684	-0.01597		0.33333	0.042991		0.16155	0.031977		0.34359	0.043491		0.63686	0.15246		0.45188	0.020125		0.23377	-0.08094		0.39605	0.0886		0.43571	0.42273		0.23549	-0.012606		3.5	27	0	1
0.33098	0.1827		0.2127	0.060168			-0.23706			-0.17399		0.33273	0.10735		0.296843	0.072342					0.15961			0.33098	0.1827					0.38452	0.19895			0.083138						0.22398		0.23051	0.19884		0	20	0	0
0.39733	0.015887		0.28598	0.097187								0.2927	0.014141		0.21176	0.02422								0.39733	0.015887									0.053041						0.247					0	2	4.5	0
0.28195	-0.06445		0.27021	0.07955								0.27411	0.029665		0.21652	0.064411								0.28195	-0.06445									0.068533						0.083051					0	45.5	0	0
0.33205	0.32703		0.1877	0.047841								0.22847	0.230576		0.22287	0.09823								0.33205	0.32703															-0.23774					0	6.5	7	0
	-0.09471											0.20128	0.098532		0.38742	0.013153									-0.09471																				0	12	0	0
												0.19862	-0.03827		0.12957	0.19234																													0	25	0	0
																																													0	2	0	0
																																													0	41.5	4	97
																																													0	4	44.5	0
																																													0	0	16	0
																																													0	0	0	0
																																													0	0	0	0
																																													0	0	0	0
																																													0	0
																																													0	0
																																														0
[truncated: 4 more columns]
