# Supplementary material for: Feeding state functionally reconfigures a sensory circuit to drive thermosensory behavioral plasticity
Source: eLife. 2020 Oct 19;9:e61167. doi: 10.7554/eLife.61167 (PMC7644224; doi:10.7554/eLife.61167)
Supplement: Figure 4—source data 1. [file elife-61167-fig4-data1.xlsx]

## Sheet: Fig 4A
N2_fed	N2_st		ins-1 loxP_fed	ins-1_loxP_st		ins-1p_cre_fed	ins-1p_cre_st		ins-1loxP_AIA_Cre_fed	ins-1loxP_AIA_Cre_st		ins-1loxP_AIZ_Cre_Fed	ins-1loxP_AIZ_Cre_st		ins-1loxP_intestine_cre_fed	ins-1loxP_intestine_cre_St
0.10386	-0.10458		0.3121	0.02074		0.044975	0.34766		0.43097	0.02904		0.21863	0.13825		0.26472	0.27051
0.31208	-0.0051635		0.27935	0.16115		0.091709	0.30329		0.55949	0.13179		0.36984	0.1813		0.29505	0.37921
0.26488	-0.097353		0.22669	0.02656		0.15857	0.20061		0.23476	0.16692		0.49813	0.15585		0.38866	0.26347
0.28445	0.12452		0.45217	0.19248		0.23893	0.22941		0.25325	0.12017		0.40735	0.22442		0.25706	0.26735
0.22503	-0.03727		0.3904	0.092133		0.20851	0.29095		0.4397	0.035803		0.40396	-0.06512		0.29596	0.28883
0.32844	-0.16063		0.41928	-0.097716		0.45414	0.19145		0.3826	0.18147		0.22924	0.085806		0.25271	0.26986
0.44359	0.043491		0.11919	0.13055		0.30962	0.20961		0.23325	0.052901		0.23651	0.22602		0.48167
0.23098	0.1627		0.30982				0.38677		0.16695	0.093967			-0.045283
0.39733	0.015887		0.24991										0.023846
0.28195	-0.06445		0.12597										-0.0060314
0.43205	0.32703		0.23441
0.46909	-0.09471		0.28556
0.17139	0.11735		0.20257
0.37411	0.11078		0.2412
	0.029665

## Sheet: Fig 4D
N2_fed	N2_st		ins-1_fed	ins-1_st		daf-18_fed	daf-18_St		daf-16_Fed	daf-16_St		daf-2_fed	daf-2_st
0.32844	-0.16063		0.30231	0.14599		0.33112	0.24478		0.32437	0.18236		0.28686	0.17006
0.34359	0.043491		0.21618	0.29787		0.25604	0.21833		0.47116	0.55098		0.039191	0.16486
0.33098	0.1827		0.25752	0.26205		0.26336	0.033691		0.44124	0.43464		0.28934	-0.090504
0.39733	0.015887		0.21658	0.3899		0.20869	0.21201		0.43429	0.24247		0.36364	-0.13821
0.28195	-0.06445		0.4088	0.10084		0.32321	0.19764		0.57356	0.33604		0.28079	0.26735
0.33205	0.32703		0.12466	-0.024885		0.23481	0.077467		0.53513	0.40452		0.25059	0.17985
0.3048	-0.09471		0.35746	0.29875		0.085512	0.29215		0.48365	0.081556		0.34775	0.2443
0.63523	0.23327		0.19066	0.096452		0.11261	0.028799		-0.08311	0.28737		0.47703	0.36425
0.34799	0.1922		0.35425	0.43504					0.32977	0.3318		0.3159	-0.084569
0.4165	-0.033532		0.26942	0.21325					0.22069	0.2495		0.47271	0.29699
0.23512	0.037789			0.40565					0.048621	0.091894		0.53052
0.46971	0.029665			0.24039					0.41895	-0.03036		0.27236
0.21098	0.084069			0.21849						0.11309
0.21492	0.17461			0.4174
0.26853	0.27727			0.30944
0.20852	0.10718			0.34338
0.43273	0.1871
0.17139	0.029567

## Sheet: Fig 4E
N2_fed_NGM	N2_st_NGM		N2_fed_auxin	N2_st_auxin		daf-16AID_AWC_tir1_fed_NGM	daf-16AID_AWC tir1_st_NGM		daf-16AID_AWC_tir1_fed_auxin	daf-16AID_AWC tir1_st_auxin		daf-16AID_AWC_tir1_fed_auxin_during assay	daf-16AID_AWC_tir1_st_auxin_during assay
0.36909	0.074069		0.45227	0.053961		0.15982	0.081556		0.43671	0.25594		0.227445	0.08046
0.22945	0.12461		0.198421	0.12917		0.2495	0.0392864		0.28894	0.222642		0.36884	0.18258
0.14415	0.07727		0.22979	-0.13305		0.32977	0.10192		0.54427	0.19322		0.15799	0.055215
0.23857	0.023163		0.205729	0.047619		0.22069	0.091894		0.34749	0.49098		0.229508	-0.051693
0.12372	0.11078		0.23684	-0.01597		0.41895	-0.030355		0.33852	0.210039		0.46394	0.080189
0.33273	0.10735		0.296843	0.072342		0.28737	0.11309		0.234549	0.24476		0.12703	-0.022955
0.2927	0.014141		0.21176	0.02422		0.3318	0.048621			0.28894		0.34837	0.029508
0.27411	0.029665		0.21652	0.064411
0.22847	0.230576		0.22287	0.09823
0.20128	0.098532		0.38742	0.013153
0.19862	-0.03827		0.12957	0.19234
0.13556	0.16155		0.16192	0.04675
0.2091	0.085526		0.23543	0.03908

## Sheet: Fig 4F
frame (2Hz)		ins1-fed	ins1-stv
1 to 30		0	0.0526
31 to60		0	0.0526
61 to 90		0	0.0526
91 to 120		0	0.1053
121 to 150		0.0526	0.1053
151 to 180		0.1053	0.0526
181 to 210		0.0526	0.0526
211 to 240		0.0526	0.0526
241 to 270		0.1579	0.1053
271 to 301		0.1579	0.0526

## Sheet: Fig 4G
frame (2Hz)		ins1-fed	ins1-stv
1 to 30		0.75	0.5789
31 to60		0.7	0.5263
61 to 90		0.55	0.4211
91 to 120		0.6	0.4737
121 to 150		0.65	0.4737
151 to 180		0.75	0.5263
181 to 210		0.7	0.4737
211 to 240		0.65	0.5263
241 to 270		0.65	0.4211
271 to 301		0.45	0.4737

## Sheet: Fig 4H
		AWC			AIA
time		ins-1 fed	ins-1 stv		ins-1 fed	ins-1 stv
0		0.6842	0.8421		0.05	0.3158
0.5		0.6842	0.8421		0.05	0.3158
1		0.6842	0.8421		0.1	0.4211
1.5		0.6842	0.8947		0.1	0.4211
2		0.6842	0.8947		0.1	0.4211
2.5		0.6842	0.8947		0.1	0.4211
3		0.6842	0.8947		0.1	0.4211
3.5		0.6842	0.8947		0.1	0.4211
4		0.6842	0.8947		0.1	0.4211
4.5		0.7368	0.8947		0.1	0.4211
5		0.7895	0.8947		0.1	0.4211
5.5		0.7895	0.8947		0.1	0.4211
6		0.7895	0.8947		0.1	0.4211
6.5		0.7895	0.8947		0.15	0.4211
7		0.7895	0.8947		0.15	0.4211
7.5		0.8421	0.8947		0.2	0.4211
8		0.8421	0.8947		0.2	0.4211
8.5		0.8421	0.8947		0.25	0.4211
9		0.8421	0.8947		0.25	0.4211
9.5		0.8421	0.8947		0.25	0.4211
10		0.8421	0.8947		0.25	0.4211
10.5		0.8421	0.8947		0.25	0.4211
11		0.8421	0.8947		0.25	0.4211
11.5		0.8421	0.8947		0.25	0.4211
12		0.8421	0.8947		0.25	0.4211
12.5		0.8421	0.8947		0.25	0.4211
13		0.8421	0.8947		0.25	0.4211
13.5		0.8421	0.8947		0.25	0.4211
14		0.8421	0.8947		0.25	0.4211
14.5		0.8421	0.8947		0.25	0.4211
15		0.8421	0.8947		0.3	0.4211
15.5		0.8421	0.8947		0.3	0.4211
16		0.8421	0.8947		0.3	0.4211
16.5		0.8947	0.8947		0.3	0.4211
17		0.8947	0.8947		0.3	0.4211
17.5		0.8947	0.8947		0.3	0.4211
18		0.8947	0.8947		0.3	0.4211
18.5		0.8947	0.8947		0.3	0.4211
19		0.8947	0.8947		0.3	0.4737
19.5		0.8947	0.8947		0.3	0.4737
20		0.8947	0.8947		0.3	0.4737
20.5		0.8947	0.8947		0.3	0.4737
21		0.8947	0.8947		0.3	0.4737
21.5		0.8947	0.8947		0.3	0.4737
22		0.8947	0.8947		0.3	0.4737
22.5		0.8947	0.8947		0.3	0.4737
23		0.8947	0.8947		0.3	0.5263
23.5		0.8947	0.8947		0.3	0.5789
24		0.8947	0.8947		0.3	0.5789
24.5		0.8947	0.8947		0.3	0.5789
25		0.8947	0.8947		0.3	0.5789
25.5		0.8947	0.8947		0.3	0.5789
26		0.8947	0.8947		0.3	0.5789
26.5		0.8947	0.8947		0.3	0.5789
27		0.8947	0.8947		0.3	0.5789
27.5		0.8947	0.8947		0.3	0.5789
28		0.8947	0.8947		0.3	0.5789
28.5		0.8947	0.8947		0.35	0.5789
29		0.8947	0.8947		0.35	0.5789
29.5		0.9474	0.8947		0.35	0.5789
30		0.9474	0.8947		0.35	0.5789
30.5		0.9474	0.8947		0.35	0.5789
31		0.9474	0.8947		0.35	0.5789
31.5		0.9474	0.8947		0.35	0.5789
32		0.9474	0.8947		0.35	0.6316
32.5		0.9474	0.8947		0.35	0.6316
33		0.9474	0.8947		0.35	0.6316
33.5		0.9474	0.8947		0.4	0.6316
34		0.9474	0.8947		0.4	0.6316
34.5		0.9474	0.8947		0.5	0.6316
35		0.9474	0.8947		0.5	0.6316
35.5		0.9474	0.8947		0.5	0.6316
36		0.9474	0.8947		0.5	0.6316
36.5		0.9474	0.8947		0.5	0.6316
37		0.9474	0.8947		0.5	0.6316
37.5		0.9474	0.8947		0.5	0.6316
38		0.9474	0.8947		0.5	0.6316
38.5		0.9474	0.8947		0.5	0.6316
39		0.9474	0.8947		0.5	0.6842
39.5		0.9474	0.8947		0.5	0.6842
40		0.9474	0.8947		0.5	0.6842
40.5		0.9474	0.8947		0.5	0.6842
41		0.9474	0.8947		0.55	0.6842
41.5		0.9474	0.8947		0.55	0.6842
42		0.9474	0.8947		0.55	0.6842
42.5		0.9474	0.8947		0.55	0.6842
43		0.9474	0.8947		0.55	0.6842
43.5		0.9474	0.8947		0.55	0.6842
44		0.9474	0.8947		0.6	0.6842
44.5		0.9474	0.8947		0.6	0.6842
45		1	0.8947		0.6	0.6842
45.5		1	0.8947		0.6	0.6842
46		1	0.8947		0.6	0.6842
46.5		1	0.8947		0.6	0.6842
47		1	0.8947		0.6	0.6842
47.5		1	0.8947		0.6	0.6842
48		1	0.8947		0.6	0.6842
48.5		1	0.8947		0.6	0.6842
49		1	0.8947		0.6	0.6842
49.5		1	0.8947		0.65	0.7368
50		1	0.8947		0.65	0.7368
50.5		1	0.8947		0.65	0.7368
51		1	0.9474		0.65	0.7368
51.5		1	0.9474		0.65	0.7368
52		1	0.9474		0.65	0.7368
52.5		1	0.9474		0.65	0.7368
53		1	0.9474		0.65	0.7368
53.5		1	0.9474		0.65	0.7368
54		1	0.9474		0.65	0.7368
54.5		1	0.9474		0.65	0.7368
55		1	0.9474		0.65	0.7368
55.5		1	0.9474		0.65	0.7368
56		1	0.9474		0.7	0.7368
56.5		1	0.9474		0.7	0.7368
57		1	0.9474		0.7	0.7368
57.5		1	0.9474		0.7	0.7368
58		1	0.9474		0.7	0.7368
58.5		1	0.9474		0.7	0.7368
59		1	0.9474		0.7	0.7368
59.5		1	0.9474		0.7	0.7368
60		1	0.9474		0.7	0.7368
60.5		1	0.9474		0.7	0.7368
61		1	0.9474		0.7	0.7368
61.5		1	0.9474		0.7	0.7368
62		1	0.9474		0.7	0.7368
62.5		1	0.9474		0.7	0.7368
63		1	0.9474		0.7	0.7368
63.5		1	0.9474		0.7	0.7368
64		1	0.9474		0.7	0.7368
64.5		1	0.9474		0.7	0.7368
65		1	0.9474		0.7	0.7368
65.5		1	0.9474		0.7	0.7368
66		1	0.9474		0.7	0.7368
66.5		1	0.9474		0.7	0.7368
67		1	0.9474		0.75	0.7368
67.5		1	0.9474		0.75	0.8421
68		1	0.9474		0.75	0.8421
68.5		1	0.9474		0.8	0.8421
69		1	0.9474		0.8	0.8421
69.5		1	0.9474		0.8	0.8421
70		1	0.9474		0.8	0.8421
70.5		1	0.9474		0.8	0.8421
71		1	0.9474		0.8	0.8421
71.5		1	0.9474		0.8	0.8947
72		1	0.9474		0.8	0.8947
72.5		1	0.9474		0.85	0.8947
73		1	0.9474		0.85	0.8947
73.5		1	0.9474		0.85	0.8947
74		1	0.9474		0.85	0.8947
74.5		1	0.9474		0.85	0.8947
75		1	0.9474		0.85	0.8947
75.5		1	0.9474		0.85	0.8947
76		1	0.9474		0.85	0.8947
76.5		1	0.9474		0.85	0.8947
77		1	0.9474		0.85	0.8947
77.5		1	0.9474		0.85	0.8947
78		1	0.9474		0.9	0.8947
78.5		1	0.9474		0.9	0.8947
79		1	0.9474		0.9	0.8947
79.5		1	0.9474		0.9	0.8947
80		1	0.9474		0.95	0.9474
80.5		1	0.9474		0.95	0.9474
81		1	0.9474		0.95	0.9474
81.5		1	0.9474		0.95	0.9474
82		1	0.9474		0.95	0.9474
82.5		1	0.9474		0.95	0.9474
83		1	0.9474		0.95	0.9474
83.5		1	0.9474		0.95	0.9474
84		1	0.9474		0.95	0.9474
84.5		1	0.9474		0.95	0.9474
85		1	0.9474		0.95	0.9474
85.5		1	0.9474		0.95	0.9474
86		1	0.9474		1	0.9474
86.5		1	0.9474		1	0.9474
87		1	0.9474		1	0.9474
87.5		1	0.9474		1	0.9474
88		1	0.9474		1	0.9474
88.5		1	0.9474		1	0.9474
89		1	0.9474		1	0.9474
89.5		1	0.9474		1	0.9474
90		1	0.9474		1	0.9474
90.5		1	0.9474		1	0.9474
91		1	0.9474		1	0.9474
91.5		1	0.9474		1	0.9474
92		1	0.9474		1	0.9474
92.5		1	0.9474		1	0.9474
93		1	0.9474		1	0.9474
93.5		1	0.9474		1	0.9474
94		1	0.9474		1	1
94.5		1	0.9474		1	1
95		1	0.9474		1	1
95.5		1	0.9474		1	1
96		1	0.9474		1	1
96.5		1	0.9474		1	1
97		1	0.9474		1	1
97.5		1	1		1	1
98		1	1		1	1
98.5		1	1		1	1
99		1	1		1	1
99.5		1	1		1	1
100		1	1		1	1
