# Supplementary figures and images for: Feeding state functionally reconfigures a sensory circuit to drive thermosensory behavioral plasticity
Source: eLife journal article supplement (doi:10.7554/elife.61167), 2020-10-19

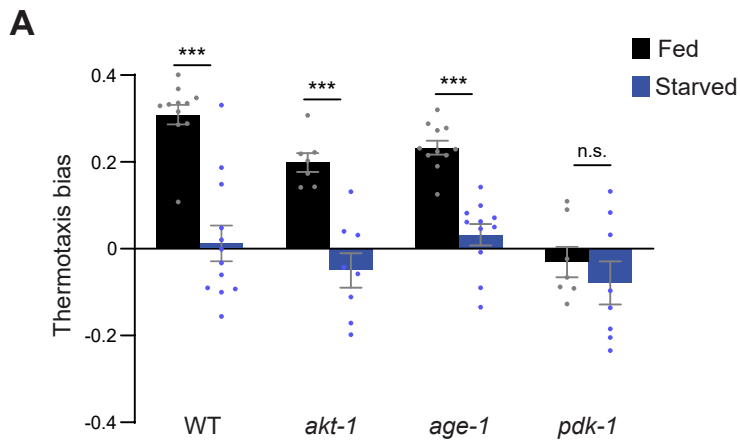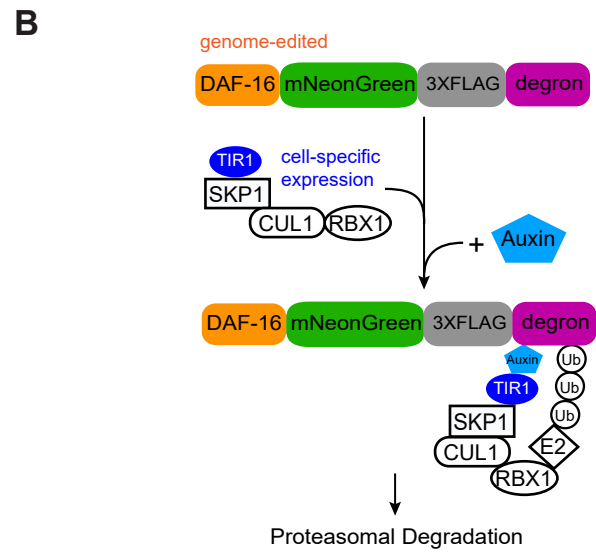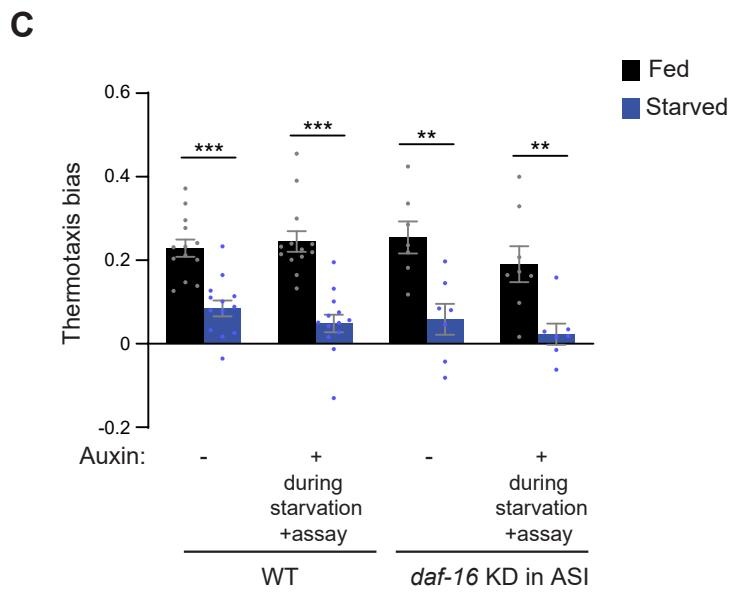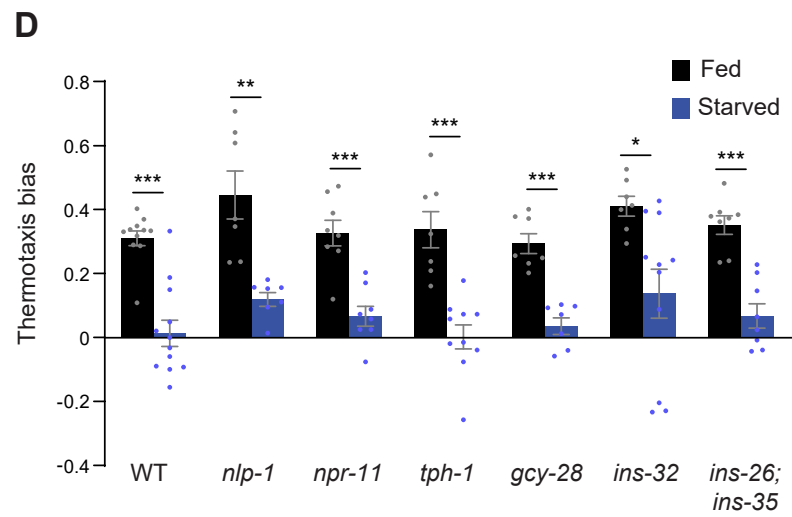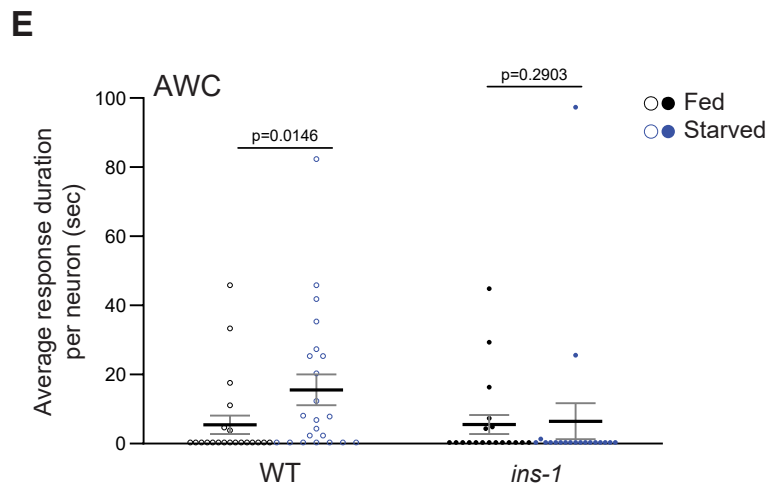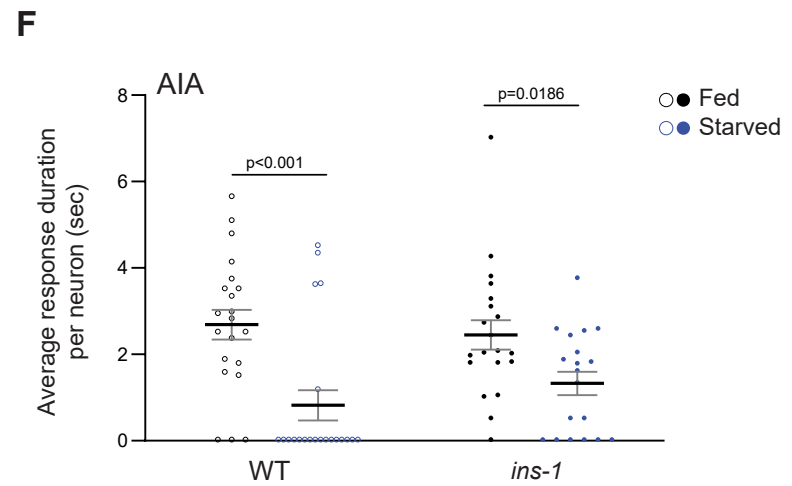

Supplement: supp [file elife-61167-supp-v1.zip]

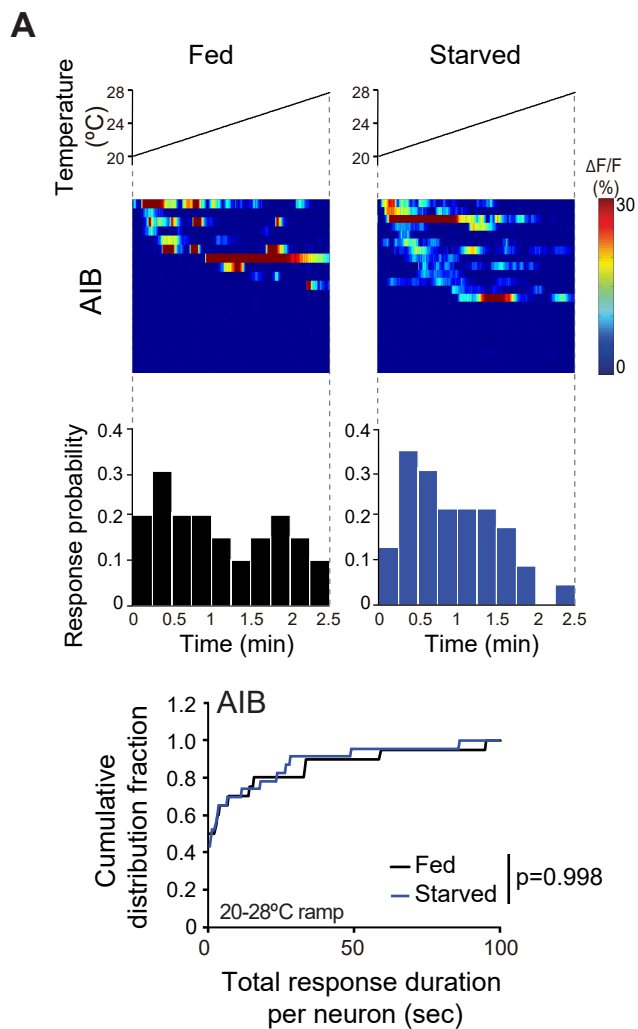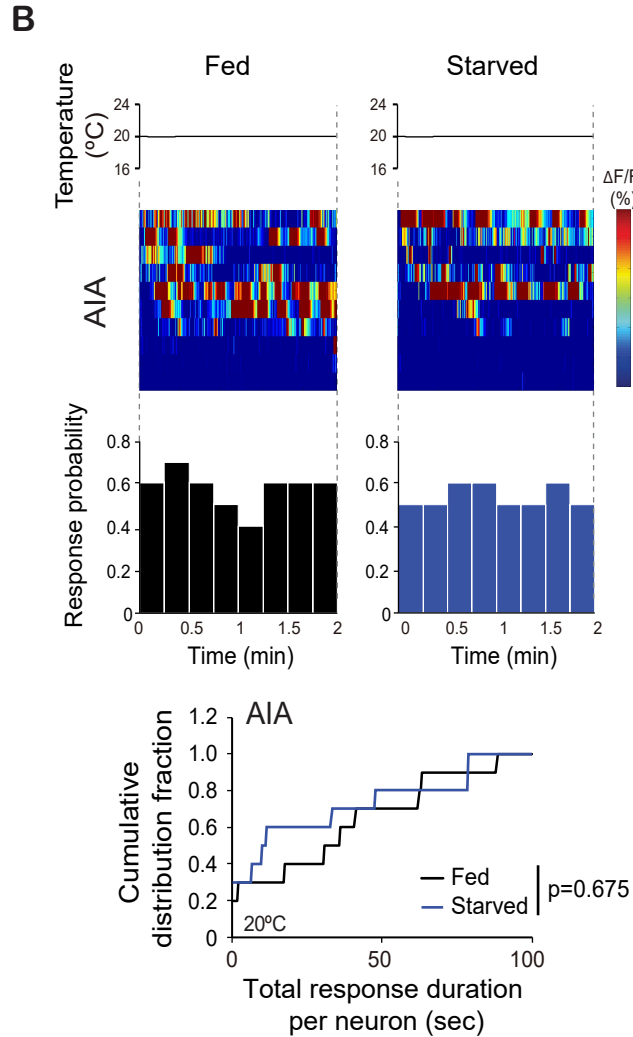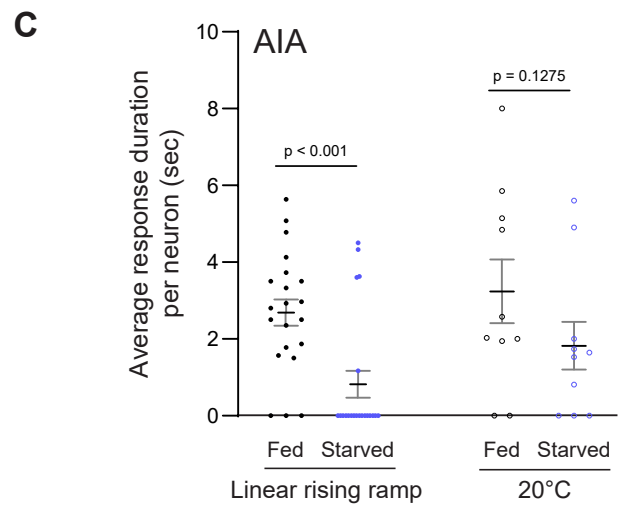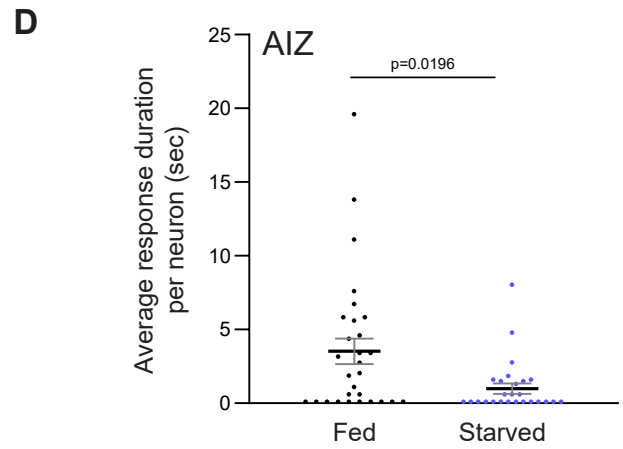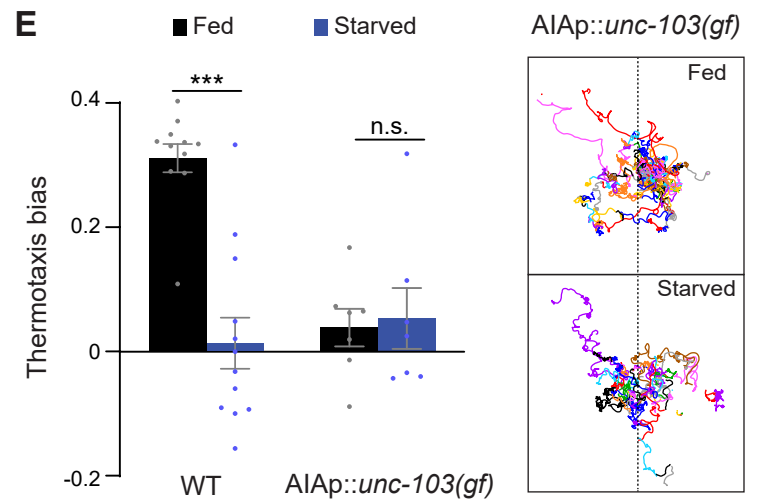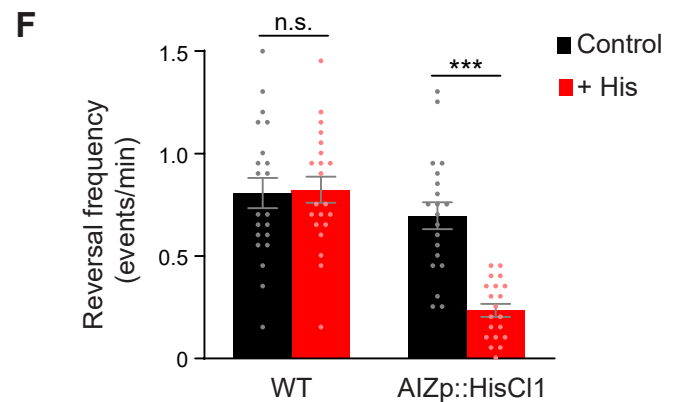

Supplement: supp [file elife-61167-supp-v1.zip]

**A** AWCp::HisCl1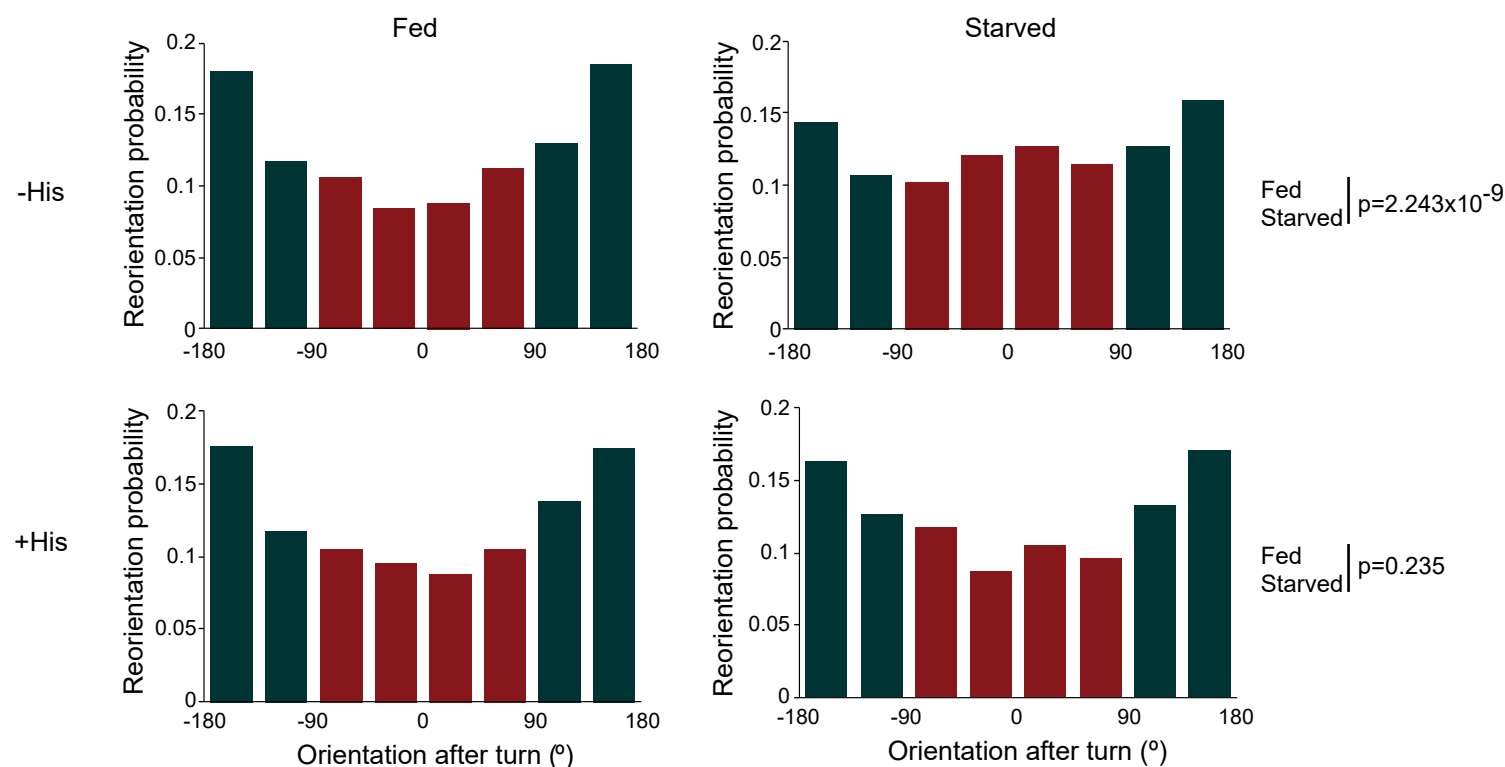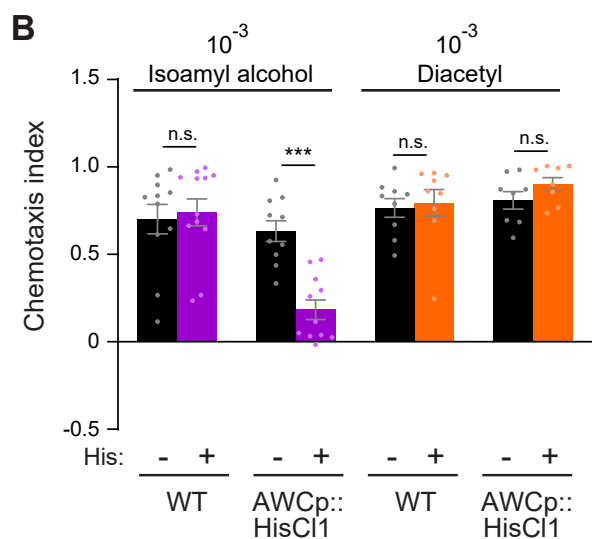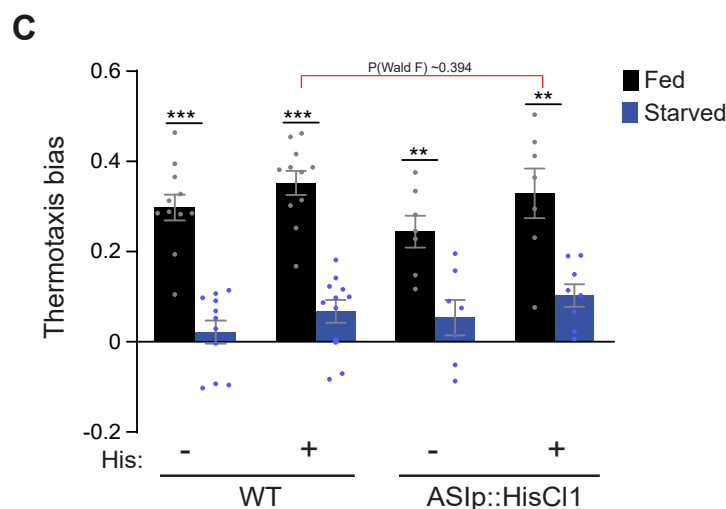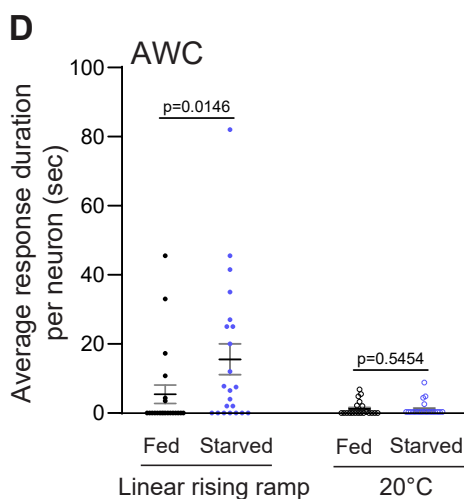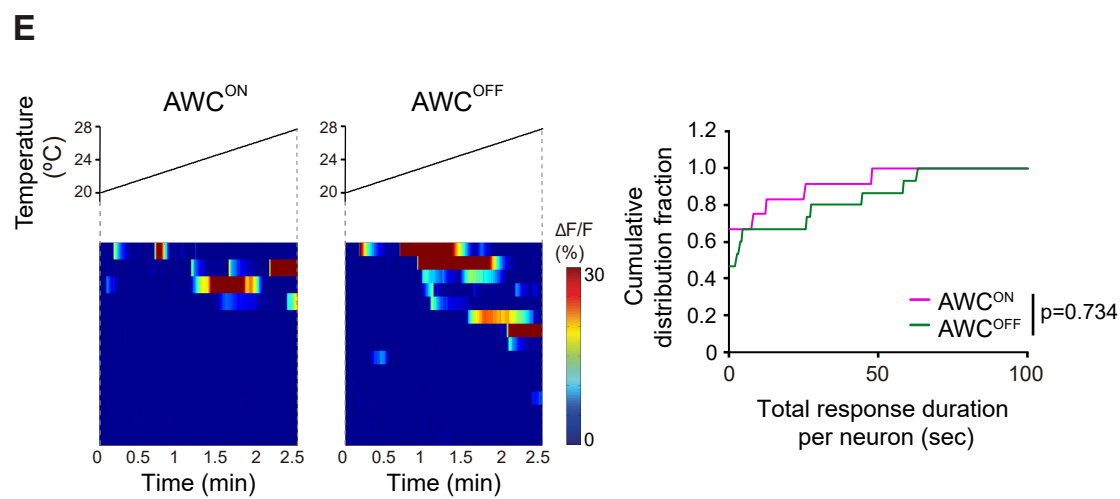

Supplement: supp [file elife-61167-supp-v1.zip]

**A**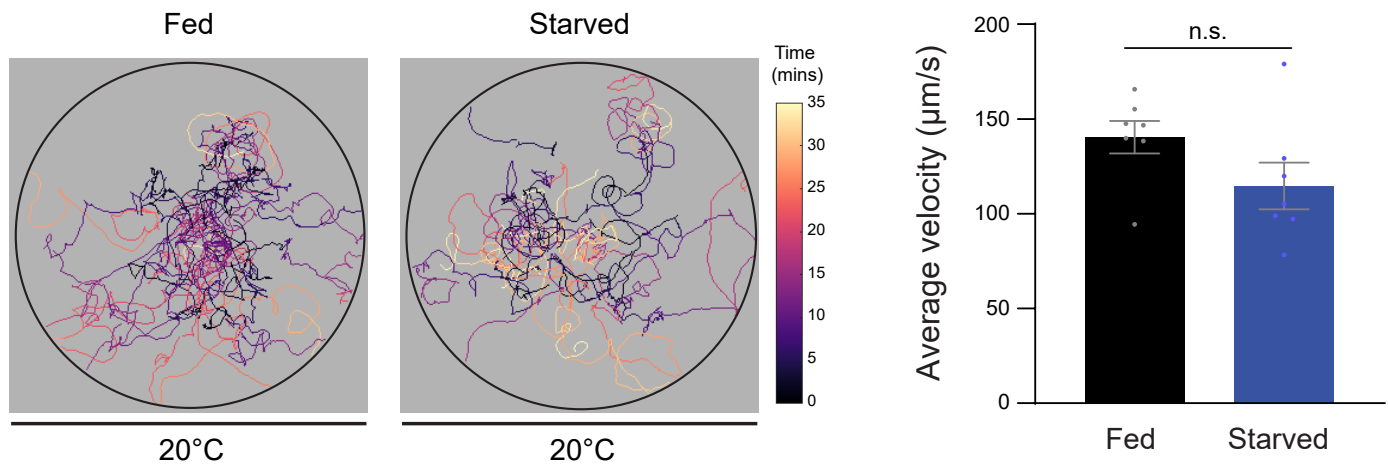**B**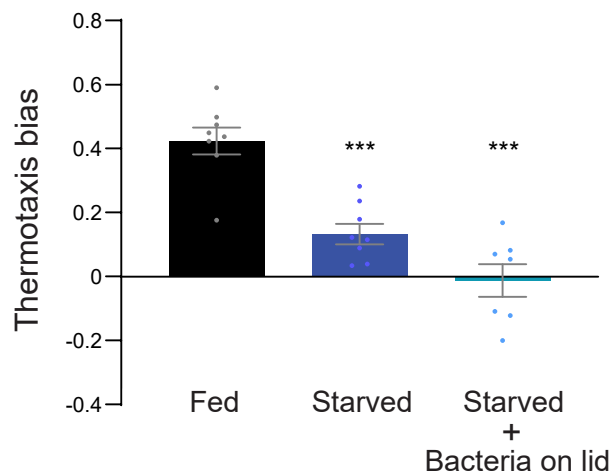**C**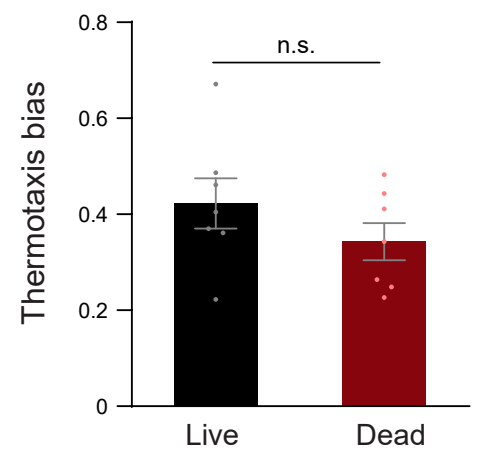

**Takeishi, Yeon et al**  
**Figure 1 - figure supplement 1**

Supplement: supp [file elife-61167-supp-v1.zip]

**A**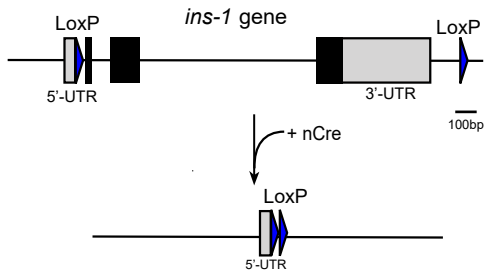**C**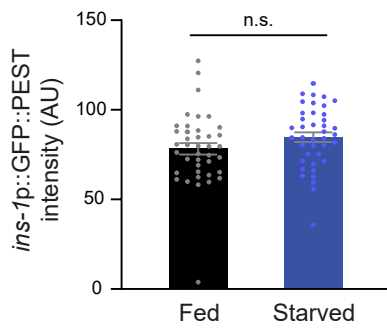**B**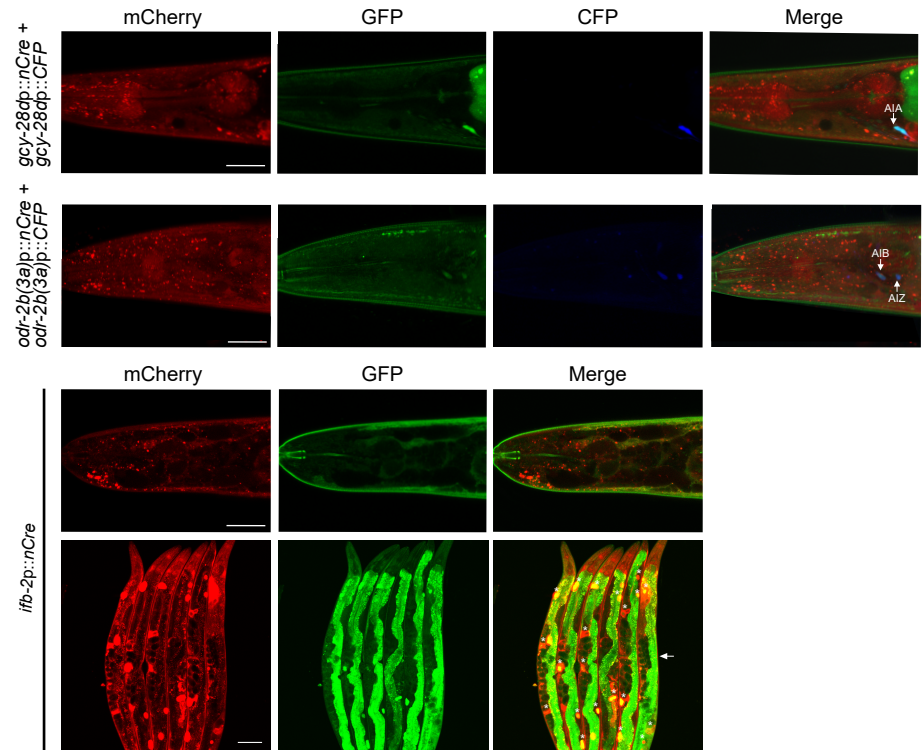

Takeishi, Yeon et al  
Figure 4 - figure supplement 1

Supplement: supp [file elife-61167-supp-v1.zip]

**A**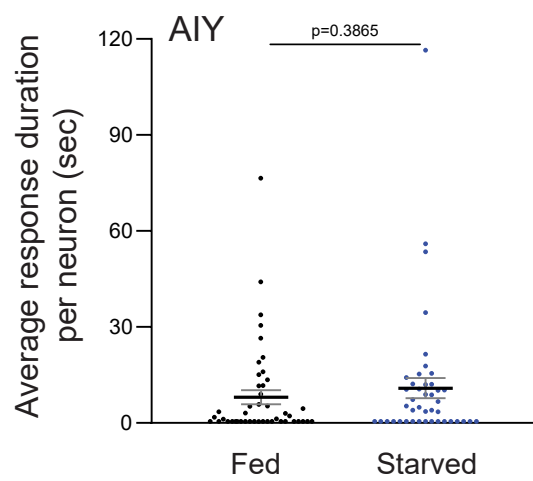**B**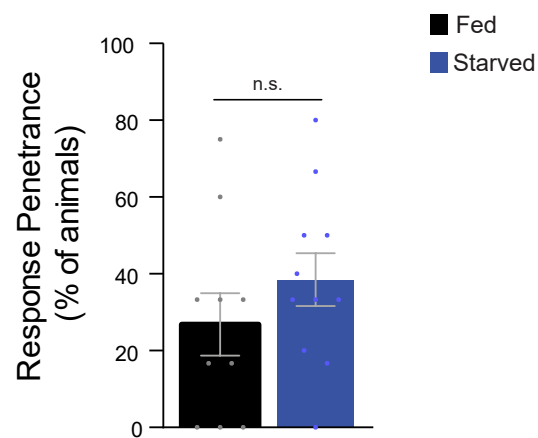

Takeishi, Yeon et al  
Figure 1 - figure supplement 2

Supplement: supp [file elife-61167-supp-v1.zip]
